# Supplementary material for: Effect of melatonin on quality of life and symptoms in patients with cancer: a systematic review and meta-analysis of randomised controlled trials
Source: PubMed Central journal article supplement — BMJ Open. 2022 Sep 14;12(9):e060912. doi: 10.1136/bmjopen-2022-060912 (PMC9476160; doi:10.1136/bmjopen-2022-060912), 2022-09-14
Supplement: bmjopen-2022-060912.draft_revisions.pdf [file bmjopen-2022-060912.draft_revisions.pdf]

# BMJ Open

BMJ Open is committed to open peer review. As part of this commitment we make the peer review history of every article we publish publicly available.

When an article is published we post the peer reviewers' comments and the authors' responses online. We also post the versions of the paper that were used during peer review. These are the versions that the peer review comments apply to.

The versions of the paper that follow are the versions that were submitted during the peer review process. They are not the versions of record or the final published versions. They should not be cited or distributed as the published version of this manuscript.

BMJ Open is an open access journal and the full, final, typeset and author-corrected version of record of the manuscript is available on our site with no access controls, subscription charges or pay-per-view fees (<http://bmjopen.bmj.com>).

If you have any questions on BMJ Open's open peer review process please email [info.bmjopen@bmj.com](mailto:info.bmjopen@bmj.com)

# BMJ Open

## Effect of melatonin on Quality of life and symptoms in cancer patients: a systematic review and meta-analysis of randomized controlled trials

|                               |                                                                                                                                                                                                                                                                                                                                                                                                                                                     |
|-------------------------------|-----------------------------------------------------------------------------------------------------------------------------------------------------------------------------------------------------------------------------------------------------------------------------------------------------------------------------------------------------------------------------------------------------------------------------------------------------|
| Journal:                      | <i>BMJ Open</i>                                                                                                                                                                                                                                                                                                                                                                                                                                     |
| Manuscript ID                 | bmjopen-2022-060912                                                                                                                                                                                                                                                                                                                                                                                                                                 |
| Article Type:                 | Original research                                                                                                                                                                                                                                                                                                                                                                                                                                   |
| Date Submitted by the Author: | 08-Jan-2022                                                                                                                                                                                                                                                                                                                                                                                                                                         |
| Complete List of Authors:     | Fan, Rongrong; Hunan Cancer Hospital, Bu, Xiaofan; Central South University Xiangya School of Nursing<br>Yang, Siyu; Hunan Cancer Hospital<br>Tan, Yan; Hunan Cancer Hospital, Department of Gastrointestinal surgery<br>Wang, Tongyu; Hunan Cancer Hospital, Department of Nursing Teaching and Research<br>Chen, Hongyun; Hunan Cancer Hospital, Department of Nursing Teaching and Research<br>LI, Xuying; Hunan Province, Department of Nursing |
| Keywords:                     | Adult oncology < ONCOLOGY, Pharmacology < TROPICAL MEDICINE, CLINICAL PHARMACOLOGY                                                                                                                                                                                                                                                                                                                                                                  |
|                               |                                                                                                                                                                                                                                                                                                                                                                                                                                                     |

SCHOLARONE™  
Manuscripts

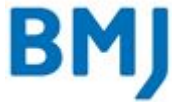

I, the Submitting Author has the right to grant and does grant on behalf of all authors of the Work (as defined in the below author licence), an exclusive licence and/or a non-exclusive licence for contributions from authors who are: i) UK Crown employees; ii) where BMJ has agreed a CC-BY licence shall apply, and/or iii) in accordance with the terms applicable for US Federal Government officers or employees acting as part of their official duties; on a worldwide, perpetual, irrevocable, royalty-free basis to BMJ Publishing Group Ltd ("BMJ") its licensees and where the relevant Journal is co-owned by BMJ to the co-owners of the Journal, to publish the Work in this journal and any other BMJ products and to exploit all rights, as set out in our [licence](#).

The Submitting Author accepts and understands that any supply made under these terms is made by BMJ to the Submitting Author unless you are acting as an employee on behalf of your employer or a postgraduate student of an affiliated institution which is paying any applicable article publishing charge ("APC") for Open Access articles. Where the Submitting Author wishes to make the Work available on an Open Access basis (and intends to pay the relevant APC), the terms of reuse of such Open Access shall be governed by a Creative Commons licence – details of these licences and which [Creative Commons](#) licence will apply to this Work are set out in our licence referred to above.

Other than as permitted in any relevant BMJ Author's Self Archiving Policies, I confirm this Work has not been accepted for publication elsewhere, is not being considered for publication elsewhere and does not duplicate material already published. I confirm all authors consent to publication of this Work and authorise the granting of this licence.

## Effect of melatonin on Quality of life and symptoms in cancer patients: a systematic review and meta-analysis of randomized controlled trials

Rongrong Fan<sup>1</sup>, Xiaofan Bu<sup>2</sup>, Siyu Yang<sup>3</sup>, Yan Tan<sup>4</sup>, Tongyu Wang<sup>5</sup>, Hongyun Chen<sup>6</sup>, Xuying Li<sup>7\*</sup>

### Affiliations

1 Master, Department of Nursing Teaching and Research, Hunan Cancer Hospital/Affiliated Cancer Hospital of Xiangya nursing school of Central South University, Changsha, China.

2 Master, Xiangya nursing school of Central South University, Changsha, China.

3 Master, Department of Nursing Teaching and Research, Hunan Cancer Hospital/Affiliated Cancer Hospital of Xiangya nursing school of Central South University, Changsha, China.

4 Master, Department of Gastrointestinal surgery, Hunan Cancer Hospital/Affiliated Cancer Hospital of Xiangya nursing school of Central South University, Changsha, China.

5 Master, Department of Nursing Teaching and Research, Hunan Cancer Hospital/Affiliated Cancer Hospital of Xiangya nursing school of Central South University, Changsha, China.

6 Master, Department of Nursing Teaching and Research, Hunan Cancer Hospital/Affiliated Cancer Hospital of Xiangya nursing school of Central South University, Changsha, China.

7 PHD, Department of Nursing, Hunan Cancer Hospital/Affiliated Cancer Hospital of Xiangya nursing school of Central South University, Changsha, China. Electronic address: lixuying@hnca.org.cn

### Abstract

**Objective** The study was to systematically review the effect of the melatonin on quality of life and symptoms among cancer patients.

**Design** Systematic review and meta-analysis.

**Methods** Nine databases were systematically reviewed from inception to November 2021 for randomized controlled trials (RCTs). Two reviewers critically and independently assessed the risk of bias and extracted data using the designed form. All analyses were performed with Review Manager 5.3.

**Results** A total of 19 qualified studies that included 2101 cancer patients (melatonin: 1078, control: 1023) were included in the meta-analysis. Results indicated that melatonin had no significant effect on QoL [SMD = -0.01, 95% CI (-0.14, 0.11), P = 0.83], sleep quality [SMD = -0.35, 95% CI (-0.73, 0.03), P = 0.07], fatigue [SMD = 0.34, 95% CI (-0.73, 0.06), P = 0.10], pain [SMD = -0.34, 95% CI (-0.7, 0.02), P = 0.06] and severity of stomatitis [OR = 0.6, 95% CI (0.31, 1.16), P = 0.13]. Melatonin had significant effect on incidence of stomatitis [OR = 0.49, 95% CI (0.35, 0.69), P < 0.001], but couldn't reduce the incidence of stomatitis among head and neck cancer patients [OR = 1.17, 95% CI (0.57, 2.39), P = 0.67]. Meanwhile, melatonin could improve depression among patients who experienced intervention duration greater than 14 days [SMD = -0.14, 95% CI (-0.27, -0.01), P = 0.03] and those who under operation [SMD = -0.17, 95% CI (-0.32, -0.03), P = 0.02].

**Conclusion** Finding showed that melatonin couldn't improve the QoL, sleep quality, fatigue, pain and stomatitis severity among cancer patients. However, melatonin could decrease the incidence of stomatitis, though no effect on the head and neck cancer patients. Melatonin could decrease depression of cancer patients under operation and those received longer melatonin duration. Our review stressed the need for more high-quality RCTs.

### PROSPERO registration number

CRD42021292855.

### Strengths and limitations of this study

- As there are few meta-analyses and systematic review of melatonin on cancer patients. Our research tried to prove the effect of melatonin on QoL and symptoms (sleep, fatigue, pain, depression, stomatitis) in cancer patients, to provide a basis for future research.
- The significant results from subgroup analysis should be interpreted prudently due to the small number of the included studies.
- Differences in cancer diagnose, companied treatment and administration duration might be the main sources of heterogeneity in our study.

### Introduction

Melatonin (MLT) is an important endogenous indoleamine that is synthesized and secreted into the systemic circulation and cerebrospinal fluid by the pineal gland, which has recognized anti-aging, anti-inflammatory, and anti-oxidant properties<sup>1</sup>. It also has a substantial role to regulate the circadian rhythm and sleep during the night. Recent studies proved the effect of melatonin on limiting skeletal muscle frailty, prolonging physical performance<sup>2</sup> and preventing bone loss<sup>3</sup>. In the oncology field, melatonin has significant apoptotic, angiogenic, oncostasis and anti-proliferative effects on various oncological cells<sup>4</sup>. It was proved that low levels of melatonin might be a risk factor for breast cancer<sup>5</sup>. Meanwhile, many studies have shown that melatonin's co-administration improves the sensitivity of cancers to inhibition by conventional drugs, and reduces the toxic consequences of anti-cancer drugs while increases their efficacy<sup>6</sup>. Once a meta-analysis revealed that MLT may benefit cancer patients who are also receiving chemotherapy, radiotherapy, supportive therapy, or palliative therapy by improving survival and ameliorating the side effects of chemotherapy<sup>7</sup>. Cancer patients commonly face various disturbing and substantial challenges, including physical symptoms brought by disease or anticancer treatment, psychological/spiritual distress, inadequate social support and information<sup>8</sup>, lead to decreased quality of life. MLT has been shown to be associated with a wide variety of health outcomes in cancer patients<sup>9</sup>, with less toxicity and side effects. Palmer et al showed that a neuroprotective effect of melatonin to counteract the adverse effects of chemotherapy on cognitive function, sleep quality and depressive symptoms in breast cancer patients<sup>10</sup>. Recent clinical trial proved the relationship between decreased levels of fatigue associated with the malignant condition and melatonin supply<sup>11</sup>. However, some of the recent findings published suggest the conflicting results<sup>12 13</sup> that melatonin intervention cannot improve the QoL or release the symptoms burden, or presented the uncertain results<sup>14</sup>. In addition, the relationship between the benefits of melatonin and the cancer type, duration, length, combined treatment is still unspecific and ambiguous. Thus, with accumulating evidence, we perform a systematic review and meta-analysis of randomized controlled trials (RCTs) to investigate the roles of melatonin, versus placebo, in the effectiveness of improving QoL and symptoms.

### Methods

This review was conducted in accordance with the Preferred Reporting Items for Systematic Reviews and Meta-Analyses guidelines (PRISMA) and the recommendations of the Cochrane

1  
2  
3 Collaboration. The study was registered in PROSPERO with a registration number of  
4 CRD42021292855.  
5  
6

### 7 **Search strategy**

8 A throughout search was conducted in Cochrane Library, PubMed, Embase, Web of Science,  
9 Medline, CINAHL, Scopus, ClinicalTrials.gov, and China Biology Medicine (CBM) from  
10 inception through November 2021 for randomized controlled trials (RCTs) without language  
11 restrictions. Sources of unpublished studies and gray literature to be searched through ProQuest  
12 and Open Gray. We used medical subject headings (MeSH) and text words to identify the  
13 potential interest studies (see supplemental file 1).  
14  
15  
16

### 17 **Eligibility criteria**

#### 18 **Participants**

19 Studies including adult patients ( $\geq 18$  years) who were diagnosed with cancer, regardless of cancer  
20 type, cancer stage, and current treatment, were eligible.  
21  
22

#### 23 **Interventions and controls**

24 All trials that reported and evaluated effects of melatonin were included. Literature excluded if they  
25 met the following criteria:(1) they were study design except RCT; (2) had studies the effects of  
26 melatonin along with other interventions (3) had lack of sufficient data for the interested outcomes.  
27  
28

#### 29 **Outcomes**

30 Primary outcome was Quality of life. The scores of sleep quality, fatigue, depression, and pain, as  
31 well as the rate of stomatitis and its severity were the secondary outcome.  
32

#### 33 **Studies**

34 Only RCTs were eligible.  
35  
36

#### 37 **Data extraction**

38 Two independent researchers (SiyuYang, Tongyu Wang) extracted the data, evaluated the quality  
39 of eligible studies, and performed double-checks. Any disagreements and differences were resolved  
40 by a third independent investigator (Xiaofan Bu). The following data from the full text of selected  
41 studies were extracted: first author's name, year of publication, the characteristics of the patients,  
42 the characteristics of the intervention and the control groups (study design, form of intervention,  
43 dose of melatonin supplementation, study duration), number of participants in each group and  
44 outcome results (means and standard deviations for continuous data; number of incidents for  
45 dichotomous data).  
46  
47  
48

#### 49 **Risk of bias assessment**

50 Two reviewers independently evaluated the risk of bias in the included RCTs using the Cochrane  
51 assessment tool, which consists of the following seven domains: "random sequence generation,  
52 allocation concealment, blinding of participants and personnel, blinding of outcome assessment,  
53 incomplete outcome data, selective reporting, and other bias". Each question can be rated as follows:  
54 yes (+), low risk of bias; unclear (?), unclear risk of bias; no (-), high risk of bias.  
55  
56  
57

#### 58 **Data analysis**

59 The meta-analysis was performed using Review Manager Software (version 5.3). The effect of  
60

1  
2  
3 melatonin on scores of QOL and symptoms were estimated by mean difference (MD) when trials  
4 measured an outcome by using the same measurement method or scale. We used standard mean  
5 difference (SMD) when trials used different instruments to measure the same outcome. For  
6 dichotomous outcomes (such as stomatitis and its severity), we used odds ratio (OR). The effect  
7 size (ES) and the 95% confidence interval (CI) for primary and secondary outcomes were computed.  
8 The ES with scores of 0.2–0.5, 0.5–0.8, and > 0.8 were considered small, medium, and large effects,  
9 respectively. Forest plots were used to display the pooled ES, 95% CI, weight in percentage. If  
10 variability was presented by measures other than mean or SD, we used standard approaches for  
11 estimating data. If the studies did not report SD, we used the following formula to calculate missing  
12 SD:  $SD = \sqrt{N \times (\text{Upper } 95\% \text{ CI} - \text{Lower } 95\% \text{ CI}) / 3.92}$ . If a study provided medians and interquartile  
13 ranges (IQR), we transformed median and IQR to mean and SD by a method for non-normal data  
14 <sup>15</sup>.  $I^2$  was used to measure the statistical heterogeneity among the trials in each analysis. If  $P > 0.1$   
15 and  $I^2 < 50\%$ , a fixed-effects model was adopted; if  $P < 0.1$  and  $I^2 \geq 50\%$ , then a random-effects  
16 model was adopted. If heterogeneity was identified, subgroup analyses were conducted on different  
17 cancer type, dosage, and study duration if there were at least two studies on a stratum, considering  
18 that these variables might have influences on the outcomes. Sensitivity analysis was performed in  
19 light of the fact that some of the trials might impact the study results by removing studies with high  
20 or unclear risk of bias. Reporting and publication bias were investigated by visually examining the  
21 degree of asymmetry of a funnel plot.  
22  
23  
24  
25  
26  
27  
28

## 29 **Results**

### 30 **Literature search**

31 The initial search identified 1670 publications through pubmed, embase, medline, scopus, sinomed,  
32 web of science, cochrane, and clinical trial. After excluding 501 duplicates, a total of 1161 studies  
33 were retrieved for title and abstract screening. After screening for title and abstract, 1111 articles  
34 were excluded and 50 papers were retrieved for full text review. Out of 50 retrieved papers, 1 article  
35 was excluded due to wrong langue<sup>16</sup>, 6 articles were excluded without sufficient data, 14 articles  
36 were excluded without full text, 9 articles were excluded without target outcome, 1 article was  
37 excluded due to non-RCT study<sup>17</sup>. Therefore, a total of 19 articles were included in the final meta-  
38 analysis<sup>18-36</sup>. The flow chart of literature search is shown in Fig. 1.  
39  
40  
41  
42  
43

### 44 **Quality assessment**

45 We used Cochrane scoring system to assess the quality of the included studies. The overall risk of  
46 bias as shown in Fig. 2 (in supplementary material) was moderate. Nearly all studies reported  
47 appropriate random sequence generation. Most studies reported completed data and had low risk of  
48 bias on the item 'Selective reporting'. Almost a third of the studies did not report the blindness in  
49 outcome assessment. The individual risk of bias for each study is presented in Fig. 3 (in  
50 supplementary material).  
51  
52  
53

### 54 **Literature characteristics**

55 The characteristics of the patients, interventions, controls, and outcome measures are shown in  
56 Table 1.  
57  
58

59 Table 1 The characteristics of the literature  
60

| Author      | Year | Population                                                                        | Mean age (intervention/control) | Study design                                         | Time of duration                                                         | Administration time                             | Intervention group                                                   | Control group  | Outcome                                                                      | Intervention (Number) | Control (Number) |
|-------------|------|-----------------------------------------------------------------------------------|---------------------------------|------------------------------------------------------|--------------------------------------------------------------------------|-------------------------------------------------|----------------------------------------------------------------------|----------------|------------------------------------------------------------------------------|-----------------------|------------------|
| Palmer      | 2020 | Breast cancer patients undergoing chemotherapy after lumpectomy or mastectomy     | 54.24/54.11                     | Randomized, double-blinded, placebo-controlled trial | 10 days: three days prior to chemotherapy and seven following days       | Approximately 1 hour before bedtime             | Oral 20 mg melatonin                                                 | Placebo        | Depressive symptoms (BDI-II), Sleep quality (PSQI), QOL (EORTC QLQ-C30)      | 18                    | 18               |
| Rasmussen   | 2015 | Advanced cancer patients who reported significantly tired in palliative care unit | 64/65                           | Double-blind placebo-controlled crossover trial      | 7 days                                                                   | Each night                                      | Oral 20 mg melatonin                                                 | Placebo        | Fatigue (MFI-20), QOL (EORTC QLQ-C15-PAL), Insomnia (EORTC QLQ-C15-PAL)      | 21                    | 23               |
| Chen        | 2014 | Breast cancer survivors                                                           | 59/59                           | Randomized, placebo-controlled trial                 | 4 months                                                                 | Each night at 9 pm                              | 3 mg oral melatonin                                                  | Placebo        | Sleep (PSQI), depression (CES-D)                                             | 48                    | 47               |
| Pashaki     | 2021 | Breast Cancer during adjuvant chemotherapy and radiotherapy                       | 50.47/46.05                     | Randomized, Controlled, Parallel-Group trial         | 8weeks: from 1 week before until 1 month after the adjuvant radiotherapy | Every night approximately 1 hour before bedtime | Oral 18 mg melatonin                                                 | Placebo        | Fatigue (BFI)                                                                | 38                    | 36               |
| Madsen      | 2016 | Patients undergoing breast cancer surgery                                         | 51/59                           | Randomized, Double-Blind, Placebo-Controlled Trial   | 2weeks: 3 days preoperatively until 2 weeks postoperatively              | Approximately 1 h before bedtime                | 6mg oral melatonin                                                   | Placebo        | Sleep (VAS, KSS), pain (VAS)                                                 | 27                    | 21               |
| Hansen      | 2014 | Patients undergoing breast cancer surgery                                         | 51/60                           | Randomized, double-blind, placebo-controlled trial   | 10days: 2 days preoperatively till 8 days postoperatively                | Approximately 1 h before bedtime                | 6 mg oral melatonin                                                  | Placebo        | Depression (MDI), Sleepiness (KSS, VAS), Fatigue (VAS), Pain (VAS)           | 28                    | 26               |
| Onseng      | 2017 | Head and Neck Cancer Patients Receiving Concurrent Chemoradiation                 | 47.3/49.6                       | Randomized, placebo-controlled trial                 | 35days: 5 days a week throughout the 7 weeks of chemoradiation           | At night after 21:00                            | 10 mL of a 0.2% melatonin niosome oral gargle plus 20 mg oral dosage | placebo        | QOL (FACT—H&N), Mucositis incidence rate, Mucositis severity (WHO-G)         | 19                    | 20               |
| Sookprasert | 2014 | NSCLC patients receiving chemotherapy                                             | 56.8/55.6                       | Randomized, double-blind, placebo-controlled trial   | 2 months: during chemotherapy for 2 months                               | At night after 21:00                            | 10 mg melatonin or 20 mg melatonin                                   | Placebo        | QOL(FACT-L), Mucositis incidence rate                                        | 88                    | 38               |
| Seely       | 2021 | Cancer patients following lung cancer resection                                   | 67.2/67.2                       | Randomized placebo controlled clinical trial         | One year post-surgery                                                    | Approximately one hour before bedtime           | 20 mg oral melatonin                                                 | Placebo        | Fatigue (MFI-20), QOL(QLQ-LC13), Sleep (MOS), Depression (BDI 2), Pain (BPI) | 356                   | 353              |
| Shahrokhi   | 2021 | Patients With Colorectal Cancer Undergoing Chemotherapy with sleep disorder       | 63.63/64.11                     | Randomized single-blind trial                        | 4week of treatment                                                       | At bedtime                                      | 6 mg oral melatonin                                                  | 10 mg zolpidem | Sleep (GSQS, PSQI), Depression (HRSD)                                        | 45                    | 45               |



|                 |      |                                                                                        |             |                                                      |                                                                                                    |                                   |                                                            |                                                    |                                                                               |     |     |
|-----------------|------|----------------------------------------------------------------------------------------|-------------|------------------------------------------------------|----------------------------------------------------------------------------------------------------|-----------------------------------|------------------------------------------------------------|----------------------------------------------------|-------------------------------------------------------------------------------|-----|-----|
| Grutsch         | 2021 | NSCLC patients under chemotherapy                                                      | 60.3/63     | Randomized, double-blind, three-arm study            | Each patient was followed until death.                                                             | At 8AM or at 8PM                  | Oral 20 mg melatonin                                       | Placebo                                            | QOL(QLQ-C30), Fatigue (QLQ-C30), Pain (QLQ-C30), Sleep (PSQI)                 | 20  | 18  |
| P. Lissoni      | 1999 | Metastatic Solid Tumour Patients under Chemotherapy                                    | 53/56       | Randomized controlled                                | 7 days prior to chemotherapy, continued after chemotherapy interruption, until disease progression | Every night                       | Oral 20 mg melatonin                                       | Placebo                                            | Stomatitis incidence rate                                                     | 124 | 126 |
| Elsabagh H H    | 2019 | Head and neck cancer (HNC) patients undergoing radiotherapy                            | 57.8/55.9   | Randomized clinical trial                            | Six weeks                                                                                          | 30 minutes before sleeping        | Oral 20 mg melatonin                                       | Placebo                                            | Oral mucositis severity (WHO-G), Stomatitis incidence rate, Pain (NRS)        | 20  | 20  |
| P. Lissoni      | 2002 | Untreated patients with metastatic solid tumors under chemotherapy                     | 66/65       | Randomized clinical trial                            | At least 2 months                                                                                  | During the dark period of the day | Oral 20 mg melatonin plus support care                     | Placebo plus support care                          | Stomatitis incidence rate                                                     | 98  | 102 |
| Borbalas        | 2021 | Patients with head and neck cancer undergoing radiation therapy and chemical treatment | 59/56       | Randomized placebo-controlled phase II trial         | 5days lasting 7 weeks                                                                              | Not clearly                       | 3% MLT oral gel plus standard symptomatic treatment for OM | Placebo plus standard symptomatic treatment for OM | Oral mucositis severity (WHO-G), Stomatitis incidence rate                    | 40  | 39  |
| Yennurajalingam | 2019 | Patients with advanced cancer with poor sleep quality                                  | Not clearly | Double-blind randomized factorial study design       | 14d                                                                                                | At bedtime                        | MLT 20mg plus bright white light therapy                   | Bright white light therapy alone                   | Sleep (PSQI), insomnia (ISI), fatigue (FACIT-F), depression (HADS), QOL(FACT) | 6   | 8   |
| Kurdi           | 2016 | Cancer Patients with Insomnia                                                          | 55.2/49.64  | Randomized Double-Blind Placebo-Controlled Study     | 14 days                                                                                            | At 7 pm                           | Oral melatonin 3 mg                                        | Placebo                                            | Sleep (AIS)                                                                   | 25  | 25  |
| P. Lissoni      | 1997 | patients with metastatic solid tumors under chemotherapy                               | 61/58       | Randomized clinical trial                            | Until disease progression                                                                          | At the evening of each day        | Oral melatonin 20 mg                                       | Placebo                                            | Stomatitis incidence rate                                                     | 39  | 40  |
| Palmer          | 2019 | Breast Cancer Patients Receiving Chemotherapy                                          | 54.24/54.11 | Randomized, Double-Blinded, Placebo-Controlled Trial | 10 days during treatment.                                                                          | Approximately 1 h before bedtime  | Oral melatonin 20 mg                                       | Placebo                                            | Pain (NRS), Sleep (PSQI), Depression (BDI)                                    | 18  | 18  |

BDI-II, Beck Depression Inventory; PSQI, Pittsburgh Sleep Quality Index; EORTC QLQ-C30, European Organization for Cancer Research and Treatment of Cancer Quality of Life Questionnaire; MFI-20, Multidimensional Fatigue Inventory; EORTC QLQ-C15-PAL, European Organization for Research and Treatment of Cancer Quality of Life Questionnaire Core 15 Palliative Version; CES-D, Center for Epidemiologic Studies-Depression; BFI: Brief Fatigue Inventory; VAS, Visual Analogue Scale; KSS, Karolinska Sleepiness Scale; MDI, Major Depression Inventory; FACT—H&N, Functional Assessment of Cancer Therapy—H&N Version 4; FACT-L, Functional Assessment of Cancer Therapy - Lung; QLQ-LC13, Lung Cancer-13 modules; BDI 2, Beck Depression Inventory 2; MOS, Medical Outcomes Study Sleep Survey; BPI, Brief Pain Inventory; GSQS, Sleep Quality Scale; HRSD, Hamilton Rating Scale for Depression; NRS, Numeric Rating Scales; ISI, Insomnia Severity Index; FACIT-F, Functional Assessment of Cancer Illness Therapy-Fatigue subscale; HADS, Hospital Anxiety and Depression Scale; FACT, Functional Assessment of Cancer Illness Therapy; AIS, Athens insomnia scale; WHO-G, WHO grading system

## Participants

Publication dates ranged from 1997 to 2021. Among the 19 studies included in systematic review, the mean age of the participants ranged from 46.05 to 67.2 years. The sample size ranged from 14 to 709 participants. Regarding treatment trajectory, 12 studies were conducted in cancer patients with adjuvant chemotherapy and (or) radiotherapy<sup>19 20 23-26 29-32 34 35</sup>. One study was conducted in advanced cancer patients with fatigue<sup>27</sup>. One study was in breast cancer survivors<sup>18</sup>. 3 studies were in cancer patients with surgery<sup>21 28 33</sup>. 2 studies were in advanced cancer patients with poor sleep quality<sup>22 36</sup>. Regarding the cancer diagnose, 6 studies were in breast cancer<sup>18 21 28 30-32</sup>. 2 studies were in non-small cell lung cancer<sup>20 33</sup>. 3 studies were in head and neck cancer<sup>19 26 29</sup>. One was in colorectal cancer<sup>34</sup>. 7 studies were no restriction on cancer type but most in advanced cancer patients<sup>22-25 27 35 36</sup>.

## Intervention

The follow-up period ranged from seven days to one year. Melatonin dose varied between 3 and 20 mg. Types of melatonin administration, 17 were oral melatonin<sup>18-25 27 28 30-33 37</sup>, one was melatonin oral gargle<sup>26</sup>, and one was combined both<sup>29</sup>. Nearly all studies gave the melatonin at night, except one compared both in morning and night<sup>20</sup>.

## Instruments

All studies used standardized and validated tools. Quality of life was measured by four validated tools: European Organization for Cancer Research (EORTC QLQ-C30)<sup>20 31</sup>, Treatment validated for the Brazilian population (QLQ-BR 23)<sup>31</sup>, Functional Assessment of Cancer Therapy (FACT)<sup>35 36</sup>, Ferrans and Powers Quality of Life Index (QLI)<sup>20</sup>, European Organization for Research and Treatment of Cancer Quality of Life Questionnaire Core 15 Palliative Version (EORTC QLQ-C15-PAL)<sup>27</sup>, Lung Cancer-13 (QLQ-LC13)<sup>33</sup>. Sleep quality was measured by Pittsburgh Sleep Quality Index (PSQI)<sup>18 20 30 31 34 36</sup>, Visual Analogue Scale (VAS)<sup>21 28</sup>, Karolinska Sleepiness Scale (KSS)<sup>21 28</sup>, Sleep Quality Scale (GSQS)<sup>34</sup>, Athens insomnia scale<sup>22</sup>, Medical Outcomes Study (MOS) Sleep Survey<sup>33</sup>. Depression was measured by Beck Depression Inventory (BDI-II)<sup>31 33</sup>, Beck Depression Inventory (BDI)<sup>30</sup>, Center for Epidemiologic Studies-Depression (CES-D)<sup>18</sup>, Major Depression Inventory (MDI)<sup>21</sup>, Hamilton Rating Scale for Depression (HRSD)<sup>34</sup>, Hospital Anxiety and Depression Scale (HADS)<sup>36</sup>. Fatigue was measured by Multidimensional Fatigue Inventory (MFI-20)<sup>27</sup>, EORTC QLQ-C15-PAL (fatigue domain)<sup>27</sup>, Brief Fatigue Inventory (BFI)<sup>32</sup>, VAS<sup>21</sup>, Multidimensional Fatigue Index 20 questionnaire<sup>33</sup>, QLQ-C30 (fatigue domain)<sup>20</sup>, Functional Assessment of Cancer Illness Therapy-Fatigue subscale (FACIT-F)<sup>36</sup>. Pain was measured by VAS<sup>21 28</sup>, Brief Pain Inventory (BPI)<sup>33</sup>, QLQ-C30 (pain domain)<sup>20</sup>, Numeric Rating Scales (NRS)<sup>19 30</sup>. The incidence of stomatitis was calculated by the ratio of occurrences number and the total number<sup>19 23-26 29 35</sup>.

## Meta-analysis

### Effect of melatonin on quality of life

Overall, 6 clinical trials evaluated the effect of melatonin on QOL. The results showed that there was no statistically significant difference between the intervention and control groups [SMD = -0.01, 95% CI (-0.14, 0.11), P = 0.83] with no heterogeneity (I<sup>2</sup>=0%, P=0.42) (Fig. 4 was seen in supplementary material).

### Effect of melatonin on sleep quality

Nine clinical trials evaluated the effect of melatonin on sleep quality (SQ). Pooled effect size from random effect model showed a significant lowering effect of melatonin on SQ [SMD = -0.78, 95% CI (-1.47, -0.10), P = 0.02]. There was significant heterogeneity between studies ( $I^2 = 94\%$ ,  $P < 0.001$ ). We deleted a study<sup>34</sup> with obvious heterogeneity and  $I^2$  decreased to 79% [SMD = -0.35, 95% CI (-0.73, 0.03), P = 0.07] (Fig. 5 was seen in supplementary material). Subgroup analysis based on dose of melatonin, study duration, treatment, different combination of dosage and duration showed no significant differences between subgroups (Table 2).

**Table 2 Subgroup analyses of melatonin supplementation on sleep quality**

|                        | N | WMD (95% CI)         | Heterogeneity $I^2$ (P) | P within group |
|------------------------|---|----------------------|-------------------------|----------------|
| Overall effect         | 8 | -0.35 (-0.73, 0.03)  | 79% (P<0.0001)          | 0.07           |
| Dosage                 |   |                      |                         |                |
| <10mg                  | 4 | -0.32 (-0.88, 0.23)  | 77% (P=0.005)           | 0.25           |
| $\geq 10$ mg           | 4 | -0.42 (-1.16, 0.32)  | 84% (P=0.0004)          | 0.27           |
| Duration               |   |                      |                         |                |
| <2 weeks               | 2 | -0.01 (-0.33, 0.32)  | 0% (p=0.76)             | 0.96           |
| $\geq 2$ weeks         | 6 | -0.51 (-1.07, 0.05)  | 85% (p<0.00001)         | 0.08           |
| Combination            |   |                      |                         |                |
| <10mg + $\geq 2$ weeks | 3 | -0.46 (-1.18, 0.27)  | 83% (P=0.003)           | 0.22           |
| >10mg + $\geq 2$ weeks | 3 | -0.01 (-0.16, 0.13)  | 0% (P=1.00)             | 0.86           |
| >10mg + <2 weeks       | 1 | -1.75 (-2.54, -0.97) | -                       | <0.01          |
| <10mg + <2 weeks       | 1 | 0.06 (-0.5, 0.62)    | -                       | 0.83           |
| Combined treatment     |   |                      |                         |                |
| Under chemotherapy     | 2 | -0.87 (-2.57, 0.82)  | 91% (P=0.0009)          | 0.31           |
| Under surgery          | 3 | -0.02 (-0.15, 0.12)  | 0% (P=0.89)             | 0.83           |
| With insomnia          |   |                      |                         |                |
| Yes                    | 2 | -0.7 (-1.96, 0.57)   | 77% (P=0.04)            | 0.28           |
| No                     | 6 | -0.23 (-0.58, 0.13)  | 73% (P=0.002)           | 0.21           |

N, number of the literatures

### Effect of melatonin on fatigue

The overall ES of melatonin for fatigue alleviation was medium [SMD = 0.34, 95% CI (-0.73, 0.06), P = 0.10] with high heterogeneity among studies (P = 0.002,  $I^2 = 74\%$ ), and there was no significant statistic difference. The study of Pashaki et al<sup>32</sup> showed a great heterogeneity for only this one proved a significant lower levels of fatigue in intervention group. We removed it and the heterogeneity decreased to 0 (Fig. 6 was seen in supplementary material).

### Effect of melatonin on depression

Six clinical trials evaluated the effect of melatonin on depression. Only Palmer et al showed a significant effect on depression<sup>31</sup>. The overall treatment effect on depression showed there was no statistically significant difference between the intervention and control groups [SMD = -0.24, 95% CI (-0.53, 0.05), P = 0.10] with high heterogeneity among studies (P = 0.03,  $I^2 = 60\%$ ). A sensitivity analysis was done by removing one study from the analysis<sup>31</sup> (Fig. 7 was seen in supplementary

material). Regarding subgroup analysis, a significant difference was observed on the study duration and treatment. Though, both showed a slight ES. Patients experienced intervention duration greater than 14 days had a significant lower depression [SMD = -0.14, 95% CI (-0.27, -0.01), P = 0.03] with low heterogeneity (P = 0.4, I<sup>2</sup> = 0%). Meanwhile, melatonin seemed to alleviate depression in cancer patients under operation [SMD = -0.17, 95% CI (-0.32, -0.03), P = 0.02] with low heterogeneity (P = 0.35, I<sup>2</sup> = 0%). No significant difference was observed among studies on the dosage (P = 0.43), cancer diagnose (P = 0.20), and combined chemotherapy (P = 0.13).

### Effect of melatonin on pain

Five clinical trials evaluated the effect of melatonin on pain [SMD = -0.34, 95% CI (-0.7, 0.02), P = 0.06] with high heterogeneity among studies (P = 0.03, I<sup>2</sup> = 62%). No significant difference was observed among studies on the cancer diagnose (P = 0.27), combined treatment (P = 0.37), duration (P = 0.27) and dosage (P = 0.16). Sensitivity analysis was done by removing one study<sup>19</sup> from the analysis and the heterogeneity decreased to 0% (Fig. 8 was seen in supplementary material).

### Effect of melatonin on stomatitis

As for stomatitis, all the studies were conducted in cancer patients combined with radiation or chemical treatment. Seven clinical trials evaluated the effect of melatonin on the incidence of stomatitis showed moderate ES [OR = 0.49, 95% CI (0.35, 0.69), P < 0.001] (Fig. 9 was seen in supplementary material), however high heterogeneity (P = 0.01, I<sup>2</sup> = 64%). All of the study duration were more than 2 weeks and patients all accept both melatonin or radiotherapy. Besides, nearly all these clinical trials gave the melatonin of 20mg, except one used 3% melatonin oral gel<sup>26</sup>. However, removing it or not caused little change to heterogeneity and ES. Further subgroup analysis showed that the difference in cancer type. Melatonin couldn't reduce the incidence of stomatitis among head and neck cancer patients under adjuvant chemotherapy or radiotherapy [OR = 1.17, 95% CI (0.57, 2.39), P = 0.67] with low heterogeneity (P = 0.5, I<sup>2</sup> = 0%), while had slight significant value in patients with metastatic solid tumor [OR = 0.28, 95% CI (0.17, 0.44), P < 0.0001] with low heterogeneity (P = 0.74, I<sup>2</sup> = 0%).

As for stomatitis severity, three clinical trials evaluated the effect of melatonin on the incidence of stomatitis severity, mainly in the effect on reducing 3-4 grades (severe) stomatitis according to WHO grade system. The overall treatment effect showed that the intervention has no statistically significant difference between the intervention and control groups [OR = 0.6, 95% CI (0.31, 1.16), P = 0.13] with low heterogeneity (P = 0.13, I<sup>2</sup> = 22%) (Fig. 10 was seen in supplementary material).

### Discussion

The aims of this systematic review were to determine the effectiveness of melatonin on the QoL, sleep quality, and other symptoms like fatigue, depression, pain and stomatitis of cancer patients. To the best of our knowledge, this study is the first meta-analysis that investigated the effect of melatonin on QoL and symptoms in cancer patients. Unfortunately, in the current study, we proved that melatonin didn't have beneficial effects on QoL, sleep quality, fatigue and pain. However, it had potential ability to improve depression and reduce the incidence of stomatitis, with small effect sizes in depression (ES = 0.14-0.17) and moderate effect sizes in stomatitis (ES = 0.49).

The clinical correlates of QoL in cancer patients include poor sleep quality, occurrence of

1  
2  
3 various symptoms like fatigue, depression, pain, and so on. Thus, the effect of melatonin on  
4 improving QoL might be achieved through relieving symptom suffering. However, multiple  
5 researches provided conflict results. A previous study reported beneficial short-term effects of  
6 melatonin on sleep but not QoL in haemodialysis patients<sup>38</sup>. Innominato et al revealed bedtime  
7 melatonin was associated with a significant improvement in sleep quality, fatigue severity, global  
8 quality of life, and social and cognitive functioning in advanced breast cancer patients<sup>39</sup>. In cachectic  
9 patients with advanced cancer, melatonin did not improve appetite, weight, or quality of life<sup>40</sup>. Our  
10 review included six trails regarded QoL of cancer patients as outcome. None of them proved a  
11 significant improvement in intervention group in QoL, though Grutsch et al<sup>20</sup> and Sookprasert et  
12 al<sup>35</sup> provided a trend for better QoL compared with baseline. However, improvement from baseline  
13 couldn't be the convincing evidence to confirm the certain effectiveness of melatonin on QoL, for  
14 both two research duration lasted a long time and existed various confounding factors. For the  
15 invalid effectiveness of melatonin on QoL, one of the possible interpretations might be the  
16 differences due to study population, interventions and measurements. Another explanation might be  
17 the multi-dimensional properties of QoL, which not only contained physical domain but covered  
18 the domains of psychology, spirit, and social. Thus, drugs may play a complementary role.  
19 Symptoms relief like sleep or fatigue alone seems to be difficult to effectively improve the QoL,  
20 especially for cancer patients who facing with a mass of disturbing from many aspects.

21  
22  
23  
24  
25  
26  
27 Due to the important role in regulating the circadian rhythm and sleep, many studies have  
28 conducted to verify the value of melatonin on sleep. A network meta-analysis support effectiveness  
29 of melatonin in improving sleep-onset difficulties<sup>41</sup>. A review about the influence of dietary sources  
30 of melatonin on sleep quality indicated that the sources of melatonin consumption of milk and sour  
31 cherries may improve sleep quality<sup>42</sup>. However, it seems melatonin has different effect on different  
32 study groups. Fatemeh et al found the significant effects of melatonin on sleep quality in patients  
33 with respiratory diseases, metabolic disorders, and sleep disorders, but not in mental disorders,  
34 neurodegenerative diseases and breast cancer<sup>43</sup>. Maria et al found a significant improvement of  
35 melatonin in mood and sleep quality in perimenopausal women<sup>3</sup>, while a meta-analysis showed  
36 that melatonin treatment resulted in no benefits to sleep quality, general menopause symptoms and  
37 psychological issues like depression and anxiety in menopausal women<sup>44</sup>. It is unknown whether a  
38 higher dose or longer treatment duration would have affected these circadian parameters.  
39 Innominato et al found 5mg for two months has a positive effectiveness on sleep quality and QoL  
40 in advanced breast cancer patients<sup>39</sup>. Two studies that proved the significant impact on sleep in our  
41 review were the 20mg for 10 days in breast cancer patients under chemotherapy<sup>31</sup> and 3mg for 14  
42 days in cancer patients with insomnia respectively<sup>22</sup>. Our review revealed significant large pooled  
43 effect size of melatonin on sleep, nevertheless with large heterogeneity. The subgroup analysis  
44 revealed the melatonin duration more than 2 weeks had a higher ES (ES=0.51) with a near  
45 significance (P=0.08). Unfortunately, there was no difference between dosage <10mg and  $\geq$  10mg  
46 (P=0.25-0.27), as well as different combination of dosage and duration (P=0.22-0.86), indicating  
47 the further research on the dosage and duration. As far as we know, the study on effectiveness of  
48 melatonin in cancer patients with insomnia is limited. Melatonin seems to have potential effect in  
49 cancer patients with insomnia<sup>22</sup>, but the validity disappeared when in advanced cancer patients<sup>36</sup>.  
50 The type of melatonin is another point. It was found prolonged release melatonin formulation for 2  
51 mg results in significant and clinically meaningful improvements in sleep quality, morning alertness,  
52 sleep onset latency and quality of life in primary insomnia patients<sup>45</sup> and in Parkinson's disease  
53  
54  
55  
56  
57  
58  
59  
60



1  
2  
3 patients with a poor sleep quality<sup>46</sup>. The availability of melatonin in patients with insomnia is still  
4 unknown. Combination of bright light and melatonin improved subjective daytime sleepiness,  
5 fatigue, and cognitive function in patients with delayed sleep phase disorder<sup>47</sup>, similarly failed in  
6 advanced cancer patients with insomnia<sup>36</sup>.  
7

8 Melatonin may be an effective treatment for patients with chronic fatigue syndrome<sup>48</sup>.  
9 Nevertheless, in the current study, none of the study was showed to improve fatigue in cancer  
10 patients. Only a high quality trail proved a significant effect of melatonin on breast cancer patients  
11 undergoing adjuvant chemotherapy and radiotherapy<sup>32</sup>, with melatonin 18 mg a day from 1 week  
12 before until 1 month after the adjuvant radiotherapy. The evidence supporting the usage of  
13 melatonin for cancer-related fatigue is limited. Short-term use of dexamethasone or  
14 methylprednisolone is recommended for the control of CRF in metastatic cancer patients according  
15 to ESMO Guidelines<sup>49</sup>, while the use of eszopiclone, megestrol acetate and melatonin is not  
16 recommended for the control of CRF. However, the prevent effect of melatonin on cancer-related  
17 fatigue is still under study. Non-pharmaceutical interventions were recommended to manage  
18 fatigue<sup>49</sup>. Some non-pharmaceutical interventions like relaxation exercise, massage, cognitive-  
19 behavioural therapy, physical activity and so on were demonstrated to have moderate-to-large effect  
20 size<sup>50</sup>. Multimodal therapy, qigong, aerobic exercise, and cognitive-behavioural therapy might be  
21 the best chose for cancer-related fatigue<sup>51</sup>.  
22  
23  
24  
25  
26

27 Melatonin seems to be able to ease the pain, however, the results varied in different researches.  
28 Lee et al found the prophylactic administration of melatonin confers significant clinical benefits in  
29 reducing postoperative pain and opioid use and improved sensory recovery following orthognathic  
30 surgery<sup>52</sup>. Tunay et al found preoperative oral administration of melatonin led to a reduction in pain  
31 scores, total morphine consumption and supplemental analgesic requirement after surgery<sup>53</sup>.  
32 Melatonin could improve pain in females with primary dysmenorrhea<sup>54</sup>. But it couldn't release pain  
33 in critically ill patients at ICU and patients after total knee arthroplasty<sup>55 56</sup>. Some study  
34 demonstrated that melatonin did not show any analgesic, anti-hyperalgesic, or anti-inflammatory  
35 properties in the burn injury model<sup>57</sup>. As for cancer patients, the evidence is restricted. Our review  
36 revealed that there was no significant between melatonin group and control group. Only Elsabagh  
37 et al found the beneficial effect of melatonin on alleviating pain in head and neck cancer patients  
38 undergoing radiotherapy, with dosage of 20 mg for six weeks<sup>19</sup>. At the same time, Palme et al found  
39 a more drops of pain scores from baseline in melatonin group<sup>30</sup>. The minor role of melatonin on  
40 pain in cancer patients could be explained by the cancer-related pain is one of the most common  
41 and troublesome symptoms affecting cancer patients with high severity<sup>58</sup>. Thus, for such kind sever  
42 pain, effective analgesic like opioid is more helpful. In addition, despite the availability of effective  
43 treatments, cancer-related pain may be inadequately controlled in up to 50% of patients, thus the  
44 multidisciplinary interventions are required<sup>59</sup> and the effectiveness of single melatonin seems too  
45 weak.  
46  
47  
48  
49  
50

51 Circadian rhythm disruption underlies the pathophysiology of psychiatric disorders, especially  
52 depression<sup>60</sup>. Melatonin as a pleiotropic regulator molecule and its analogues have been observed  
53 to resynchronize the circadian rhythm and to alleviate depressive symptoms<sup>61</sup>. However, duration  
54 of treatment and target population might affect the antidepressant effects of melatonin. Based on  
55 subgroup analysis, there were significant effects of melatonin supplementation on patients who  
56 experienced intervention duration greater than 14 days and patients under operation. Though, both  
57 showed a slight ES. The longer the duration is, the better antidepressant effects of melatonin might  
58  
59  
60

1  
2  
3 be. Meanwhile, cancer patients under operation obtained more benefits from melatonin. Our  
4 assumption is that patients under operation means they tend to be in the early stages of the disease  
5 with lighter disease load, possibly accompanied slight depression. Antidepressant effect of melatonin  
6 of long drug duration in patients with not so serious disease were showed in some studies. For  
7 example, melatonin administration for 12 weeks had beneficial effects on decreasing depression in  
8 women with polycystic ovary syndrome<sup>62</sup>, patients with Parkinson's disease<sup>63</sup> and diabetic  
9 hemodialysis patients<sup>64</sup>, but had no prophylactic antidepressant effect on acute coronary syndrome<sup>65</sup>  
10 and patients with acute mania<sup>66</sup>.

11  
12  
13  
14 Oral Mucositis (OM) refers to inflammation and ulceration of the oral mucosa as a frequent  
15 side-effect of cancer therapy<sup>67</sup>. It is a significant toxicity of systemic high doses of chemotherapy  
16 (CT) for cancer or radiotherapy (RT) for head and neck (H&N) cancer<sup>68</sup>. Stomatitis can hamper  
17 oral nutrition resulting in malnutrition, reduce quality of life and introduce the need for dose  
18 reductions and interruption of chemotherapy<sup>69</sup>, especially grade 3 or 4 mucositis<sup>70</sup>. Melatonin has  
19 the potential direct antitumor activity, which was proved to modulate the effects of cancer  
20 chemotherapy, by enhancing its therapeutic efficacy and reducing its toxicity<sup>71</sup>. Our review showed  
21 the overall pooling effect size of melatonin on OM was moderate (OR = 0.49). Further subgroup  
22 analysis showed that melatonin couldn't reduce the incidence of stomatitis among H&N cancer  
23 patients, while had slight significant effect in patients with metastatic solid tumor. Among the  
24 studies conducted in H&N cancer patients, Borbalas et al found that melatonin oral gel caused a  
25 consistent trend to lower incidence and shorter OM duration<sup>26</sup>. Onseong et al revealed that adjuvant  
26 melatonin could delay the onset of oral mucositis<sup>29</sup>. Elsbagh et al found the administration of  
27 melatonin could reduce severe oral mucositis development<sup>19</sup>. None of them proved the effect of  
28 melatonin on reducing the incidence of stomatitis. The possible interpretation was that compared  
29 with other cancer type under chemotherapy alone, most H&N cancer patients received the  
30 combination chemoradiotherapy, which further promoted the occurrence of stomatitis. We also  
31 found in melatonin group, the reported incidence of stomatitis was higher in H&N cancer patients  
32 (52.5%-90%) than other cancer population (5.12%-24%). Moreover, our review revealed that  
33 melatonin couldn't reduce the severity of stomatitis. A meta-analysis showed that probiotics might  
34 reduce the incidence and mitigate the severity of cancer therapy-induced OM<sup>72</sup>. Also,  
35 photobiomodulation (PBM) was recommended for the prevention of OM<sup>73 74</sup>. How the effect of  
36 them for H&N cancer patients under chemoradiotherapy are still unknown.

### 44 45 **Conclusion**

46 As far as we known, this study is the first meta-analysis that investigated the effect of melatonin  
47 on QoL and symptoms in cancer patients. Our review showed that melatonin couldn't improve the  
48 QoL, fatigue, and pain among cancer patients. However, melatonin has positive effects on  
49 decreasing the incidence of stomatitis, though no effect on the severity of stomatitis and the  
50 population of head and neck cancer patients. Melatonin had the beneficial effect on depression of  
51 cancer patients under operation and those who were administrated longer melatonin duration.  
52 Also, it showed the possible effect on sleep quality. Our review stressed the need for more high-  
53 quality RCTs to reduce the existing uncertainties. However, the main significant results were from  
54 subgroup analysis of the limited studies, thus the results should be interpreted prudently.  
55 Additionally, differences in cancer diagnose, accompanied treatment and administration duration  
56 might be the main sources of heterogeneity, indicating the need for more high-quality RCTs to  
57  
58  
59  
60

1  
2  
3 remove some uncertainty.  
4  
5

6 **Footnotes**

7 **Funding:**

8 No funding  
9

10  
11 **Conflicts of interest:**

12 All the authors have declared that no competing interest exists.  
13  
14

15 **Availability of data and material:**

16 All data relevant to the study are included in the article or uploaded as supplementary information..  
17  
18

19 **Authors' contributions:**

20 All authors contributed to the study conception and design. Study was design by Xuying Li and Rongrong  
21 Fan. Material preparation, literature search was performed by Rongrong Fan, Siyu Yang and Xiaofan  
22 Bu. Data analysis was performed by Yan Tan, Tongyu Wang. Xiaofan Bu, Siyu Yang and Tongyu Wang  
23 conducted the quality evaluation. Xuying Li, Hongyun Chen interpreted the results. The first draft of the  
24 manuscript was written by Rongrong Fan. All authors commented on previous versions of the manuscript  
25 and all authors read and approved the final manuscript.  
26  
27  
28

29 **Ethics approval:**

30 This is a meta-analysis. The Hunan Cancer Hospital Research Ethics Committee has confirmed that no  
31 ethical approval is required.  
32  
33

34 **Patient and public involvement:**

35 No patient involved  
36  
37

38 **Patient consent for publication:**

39 Not required.  
40  
41

42 **Consent for publication:**

43 The participant has consented to the submission of the original study including their data to the journal.  
44  
45

- 46  
47  
48  
49  
50  
51  
52  
53  
54  
55  
56  
57  
58  
59  
60
1. Stacchiotti A, Favero G, Rodella LF. Impact of Melatonin on Skeletal Muscle and Exercise. *Cells* 2020;9(2) doi: 10.3390/cells9020288 [published Online First: 2020/01/30]
  2. Maria S, Swanson MH, Enderby LT, et al. Melatonin-micronutrients Osteopenia Treatment Study (MOTS): a translational study assessing melatonin, strontium (citrate), vitamin D3 and vitamin K2 (MK7) on bone density, bone marker turnover and health related quality of life in postmenopausal osteopenic women following a one-year double-blind RCT and on osteoblast-osteoclast co-cultures. *Aging* 2017;9(1):256-85. doi: 10.18632/aging.101158 [published Online First: 2017/01/29]
  3. Maria S, Samsonraj RM, Munmun F, et al. Biological effects of melatonin on osteoblast/osteoclast cocultures, bone, and quality of life: Implications of a role for MT2 melatonin receptors, MEK1/2, and MEK5 in melatonin-mediated osteoblastogenesis. *Journal of pineal research*



- 2018;64(3) doi: 10.1111/jpi.12465 [published Online First: 2017/12/30]
4. Bhattacharya S, Patel KK, Dehari D, et al. Melatonin and its ubiquitous anticancer effects. *Molecular and cellular biochemistry* 2019;462(1-2):133-55. doi: 10.1007/s11010-019-03617-5 [published Online First: 2019/08/28]
  5. Veiga ECA, Simões R, Valenti VE, et al. Repercussions of melatonin on the risk of breast cancer: a systematic review and meta-analysis. *Revista da Associação Médica Brasileira (1992)* 2019;65(5):699-705. doi: 10.1590/1806-9282.65.5.699 [published Online First: 2019/06/06]
  6. Reiter RJ, Rosales-Corral SA, Tan DX, et al. Melatonin, a Full Service Anti-Cancer Agent: Inhibition of Initiation, Progression and Metastasis. *International journal of molecular sciences* 2017;18(4) doi: 10.3390/ijms18040843 [published Online First: 2017/04/20]
  7. Seely D, Wu P, Fritz H, et al. Melatonin as adjuvant cancer care with and without chemotherapy: a systematic review and meta-analysis of randomized trials. *Integrative cancer therapies* 2012;11(4):293-303. doi: 10.1177/1534735411425484 [published Online First: 2011/10/25]
  8. Wu C, Li M, Meng H, et al. Analysis of status and countermeasures of cancer incidence and mortality in China. *Science China Life sciences* 2019;62(5):640-47. doi: 10.1007/s11427-018-9461-5 [published Online First: 2019/03/23]
  9. Posadzki PP, Bajpai R, Kyaw BM, et al. Melatonin and health: an umbrella review of health outcomes and biological mechanisms of action. *BMC medicine* 2018;16(1):18. doi: 10.1186/s12916-017-1000-8 [published Online First: 2018/02/06]
  10. Palmer ACS, Zortea M, Souza A, et al. Clinical impact of melatonin on breast cancer patients undergoing chemotherapy; effects on cognition, sleep and depressive symptoms: A randomized, double-blind, placebo-controlled trial. *PloS one* 2020;15(4):e0231379. doi: 10.1371/journal.pone.0231379 [published Online First: 2020/04/18]
  11. Sedighi Pashaki A, Mohammadian K, Afshar S, et al. A Randomized, Controlled, Parallel-Group, Trial on the Effects of Melatonin on Fatigue Associated with Breast Cancer and Its Adjuvant Treatments. *Integrative cancer therapies* 2021;20:1534735420988343. doi: 10.1177/1534735420988343 [published Online First: 2021/02/06]
  12. Semiglazova TY, Osipov M, Krivorotko P, et al. Melatonin and metformin in neoadjuvant chemotherapy in locally advanced breast cancer. *Annals of Oncology* 2019;30:v100. doi: 10.1093/annonc/mdz241.003
  13. Lissoni P, Mandala M, Brivio F. Abrogation of the negative influence of opioids on IL-2 immunotherapy of renal cell cancer by melatonin. *European urology* 2000;38(1):115-8. doi: 10.1159/000020263
  14. Farshchian N, Shirzadi M, Farshchian F, et al. Evaluation of the melatonin effect on sleep quality in cancer patients. *Tehran University Medical Journal* 2020;78(1):38-42.
  15. McGrath S, Zhao X, Steele R, et al. Estimating the sample mean and standard deviation from commonly reported quantiles in meta-analysis. *Statistical methods in medical research* 2020;962280219889080. doi: 10.1177/0962280219889080 [published Online First: 2020/04/16]
  16. Sedighi Pashaki A, Afshar S, Mohamadian K, et al. Effects of melatonin on IL-6 serum level changes and fatigue caused by adjuvant chemoradiotherapy in breast cancer women: A randomized controlled Trial. *Iranian Journal of Breast Diseases* 2021;13(4):23-32. doi: 10.30699/IJBD.13.4.23
  17. Innominato PF, Lim AS, Palesh O, et al. The effect of melatonin on sleep and quality of life in patients

- with advanced breast cancer. *Supportive care in cancer : official journal of the Multinational Association of Supportive Care in Cancer* 2016;24(3):1097-105. doi: 10.1007/s00520-015-2883-6
18. Chen WY, Giobbie-Hurder A, Gantman K, et al. A randomized, placebo-controlled trial of melatonin on breast cancer survivors: impact on sleep, mood, and hot flashes. *Breast cancer research and treatment* 2014;145(2):381-8. doi: 10.1007/s10549-014-2944-4 [published Online First: 2014/04/11]
19. Elsabagh HH, Moussa E, Mahmoud SA, et al. Efficacy of Melatonin in prevention of radiation-induced oral mucositis: A randomized clinical trial. *Oral diseases* 2020;26(3):566-72. doi: 10.1111/odi.13265 [published Online First: 2019/12/24]
20. Grutsch J, Hrushesky W, Lis C, et al. Daily evening melatonin prolongs survival among patients with advanced non-small-cell lung cancer. *Biological Rhythm Research* 2021 doi: 10.1080/09291016.2021.1899485
21. Hansen MV, Andersen LT, Madsen MT, et al. Effect of melatonin on depressive symptoms and anxiety in patients undergoing breast cancer surgery: a randomized, double-blind, placebo-controlled trial. *Breast cancer research and treatment* 2014;145(3):683-95. doi: 10.1007/s10549-014-2962-2
22. Kurdi MS, Muthukalai SP. The Efficacy of Oral Melatonin in Improving Sleep in Cancer Patients with Insomnia: A Randomized Double-Blind Placebo-Controlled Study. *Indian journal of palliative care* 2016;22(3):295-300. doi: 10.4103/0973-1075.185039
23. Lissoni P. Is there a role for melatonin in supportive care? *Supportive care in cancer : official journal of the Multinational Association of Supportive Care in Cancer* 2002;10(2):110-6. doi: 10.1007/s005200100281
24. Lissoni P, Barni S, Mandala M, et al. Decreased toxicity and increased efficacy of cancer chemotherapy using the pineal hormone melatonin in metastatic solid tumour patients with poor clinical status. *European journal of cancer (Oxford, England : 1990)* 1999;35(12):1688-92. doi: 10.1016/s0959-8049(99)00159-8
25. Lissoni P, Tancini G, Barni S, et al. Treatment of cancer chemotherapy-induced toxicity with the pineal hormone melatonin. *Supportive care in cancer : official journal of the Multinational Association of Supportive Care in Cancer* 1997;5(2):126-9. doi: 10.1007/bf01262569
26. Lozano A, Marruecos J, Rubió J, et al. Randomized placebo-controlled phase II trial of high-dose melatonin mucoadhesive oral gel for the prevention and treatment of oral mucositis in patients with head and neck cancer undergoing radiation therapy concurrent with systemic treatment. *Clinical and Translational Oncology* 2021;23(9):1801-10. doi: 10.1007/s12094-021-02586-w
27. Lund Rasmussen C, Klee Olsen M, Thit Johnsen A, et al. Effects of melatonin on physical fatigue and other symptoms in patients with advanced cancer receiving palliative care: A double-blind placebo-controlled crossover trial. *Cancer* 2015;121(20):3727-36. doi: 10.1002/cncr.29563
28. Madsen MT, Hansen MV, Andersen LT, et al. Effect of Melatonin on Sleep in the Perioperative Period after Breast Cancer Surgery: A Randomized, Double-Blind, Placebo-Controlled Trial. *Journal of Clinical Sleep Medicine* 2016;12(2):225-33. doi: 10.5664/jcsm.5490
29. Onseng K, Johns NP, Khuayjarernpanishk T, et al. Beneficial Effects of Adjuvant Melatonin in Minimizing Oral Mucositis Complications in Head and Neck Cancer Patients Receiving Concurrent Chemoradiation. *Journal of alternative and complementary medicine (New York,*

- 1  
2  
3 NY) 2017;23(12):957-63. doi: 10.1089/acm.2017.0081 [published Online First: 2017/06/29]  
4  
5 30. Palmer ACS, Souza A, Dos Santos VS, et al. The Effects of Melatonin on the Descending Pain  
6 Inhibitory System and Neural Plasticity Markers in Breast Cancer Patients Receiving  
7 Chemotherapy: Randomized, Double-Blinded, Placebo-Controlled Trial. *Frontiers in*  
8 *pharmacology* 2019;10:1382. doi: 10.3389/fphar.2019.01382  
9  
10 31. Palmer ACS, Zortea M, Souza A, et al. Clinical impact of melatonin on breast cancer patients  
11 undergoing chemotherapy; effects on cognition, sleep and depressive symptoms: A  
12 randomized, double-blind, placebo-controlled trial. *PLoS one* 2020;15(4):e0231379. doi:  
13 10.1371/journal.pone.0231379  
14  
15 32. Pashaki AS, Mohammadian K, Afshar S, et al. A Randomized, Controlled, Parallel-Group, Trial on the  
16 Effects of Melatonin on Fatigue Associated with Breast Cancer and Its Adjuvant Treatments.  
17 *Integrative cancer therapies* 2021;20 doi: 10.1177/1534735420988343  
18  
19 33. Seely D, Legacy M, Auer RC, et al. Adjuvant melatonin for the prevention of recurrence and mortality  
20 following lung cancer resection (AMPLCaRe): A randomized placebo controlled clinical trial.  
21 *EClinicalMedicine* 2021;33:100763. doi: 10.1016/j.eclinm.2021.100763  
22  
23 34. Shahrokhi M, Ghaeli P, Arya P, et al. Comparing the Effects of Melatonin and Zolpidem on Sleep  
24 Quality, Depression, and Anxiety in Patients With Colorectal Cancer Undergoing Chemotherapy.  
25 *Basic and clinical neuroscience* 2021;12(1):105-14. doi: 10.32598/bcn.12.1.1650.2  
26  
27 35. Sookprasert A, Johns NP, Pnunmanee A, et al. Melatonin in patients with cancer receiving  
28 chemotherapy: A randomized, double-blind, placebo-controlled trial. *Anticancer research*  
29 2014;34(12):7327-37.  
30  
31 36. Yennurajalingam S, Carmack C, Balachandran D, et al. Sleep disturbance in patients with cancer: a  
32 feasibility study of multimodal therapy. *BMJ supportive & palliative care* 2021;11(2):170-79.  
33 doi: 10.1136/bmjspcare-2019-001877 [published Online First: 2020/01/12]  
34  
35 37. !!! INVALID CITATION !!!  
36  
37 38. Russcher M, Koch BC, Nagtegaal JE, et al. Long-term effects of melatonin on quality of life and sleep  
38 in haemodialysis patients (Melody study): a randomized controlled trial. *British journal of*  
39 *clinical pharmacology* 2013;76(5):668-79. doi: 10.1111/bcp.12093 [published Online First:  
40 2013/02/26]  
41  
42 39. Innominato PF, Lim AS, Palesh O, et al. The effect of melatonin on sleep and quality of life in patients  
43 with advanced breast cancer. *Supportive care in cancer : official journal of the Multinational*  
44 *Association of Supportive Care in Cancer* 2016;24(3):1097-105. doi: 10.1007/s00520-015-  
45 2883-6 [published Online First: 2015/08/12]  
46  
47 40. Del Fabbro E, Dev R, Hui D, et al. Effects of melatonin on appetite and other symptoms in patients  
48 with advanced cancer and cachexia: a double-blind placebo-controlled trial. *Journal of clinical*  
49 *oncology : official journal of the American Society of Clinical Oncology* 2013;31(10):1271-6. doi:  
50 10.1200/jco.2012.43.6766 [published Online First: 2013/02/27]  
51  
52 41. Baglioni C, Bostanova Z, Bacaro V, et al. A Systematic Review and Network Meta-Analysis of  
53 Randomized Controlled Trials Evaluating the Evidence Base of Melatonin, Light Exposure,  
54 Exercise, and Complementary and Alternative Medicine for Patients with Insomnia Disorder.  
55 *Journal of clinical medicine* 2020;9(6) doi: 10.3390/jcm9061949 [published Online First:  
56 2020/06/26]  
57  
58 42. Pereira N, Naufel MF, Ribeiro EB, et al. Influence of Dietary Sources of Melatonin on Sleep Quality:  
59 A Review. *Journal of food science* 2020;85(1):5-13. doi: 10.1111/1750-3841.14952 [published  
60

1  
2  
3  
4  
5  
6  
7  
8  
9  
10  
11  
12  
13  
14  
15  
16  
17  
18  
19  
20  
21  
22  
23  
24  
25  
26  
27  
28  
29  
30  
31  
32  
33  
34  
35  
36  
37  
38  
39  
40  
41  
42  
43  
44  
45  
46  
47  
48  
49  
50  
51  
52  
53  
54  
55  
56  
57  
58  
59  
60

Online First: 2019/12/20]

43. Fatemeh G, Sajjad M, Niloufar R, et al. Effect of melatonin supplementation on sleep quality: a systematic review and meta-analysis of randomized controlled trials. *Journal of neurology* 2021 doi: 10.1007/s00415-020-10381-w [published Online First: 2021/01/09]
44. Yi M, Wang S, Wu T, et al. Effects of exogenous melatonin on sleep quality and menopausal symptoms in menopausal women: a systematic review and meta-analysis of randomized controlled trials. *Menopause (New York, NY)* 2021;28(6):717-25. doi: 10.1097/gme.0000000000001757 [published Online First: 2021/03/31]
45. Wade AG, Ford I, Crawford G, et al. Efficacy of prolonged release melatonin in insomnia patients aged 55-80 years: quality of sleep and next-day alertness outcomes. *Current medical research and opinion* 2007;23(10):2597-605. doi: 10.1185/030079907x233098 [published Online First: 2007/09/19]
46. Ahn JH, Kim M, Park S, et al. Prolonged-release melatonin in Parkinson's disease patients with a poor sleep quality: A randomized trial. *Parkinsonism & related disorders* 2020;75:50-54. doi: 10.1016/j.parkreldis.2020.03.029 [published Online First: 2020/06/02]
47. Wilhelmsen-Langeland A, Saxvig IW, Pallesen S, et al. A randomized controlled trial with bright light and melatonin for the treatment of delayed sleep phase disorder: effects on subjective and objective sleepiness and cognitive function. *Journal of biological rhythms* 2013;28(5):306-21. doi: 10.1177/0748730413500126 [published Online First: 2013/10/18]
48. van Heukelom RO, Prins JB, Smits MG, et al. Influence of melatonin on fatigue severity in patients with chronic fatigue syndrome and late melatonin secretion. *Eur J Neurol* 2006;13(1):55-60. doi: 10.1111/j.1468-1331.2006.01132.x [published Online First: 2006/01/20]
49. Fabi A, Bhargava R, Fatigoni S, et al. Cancer-related fatigue: ESMO Clinical Practice Guidelines for diagnosis and treatment. *Annals of oncology : official journal of the European Society for Medical Oncology* 2020;31(6):713-23. doi: 10.1016/j.annonc.2020.02.016 [published Online First: 2020/03/17]
50. Hilfiker R, Meichtry A, Eicher M, et al. Exercise and other non-pharmaceutical interventions for cancer-related fatigue in patients during or after cancer treatment: a systematic review incorporating an indirect-comparisons meta-analysis. *British journal of sports medicine* 2018;52(10):651-58. doi: 10.1136/bjsports-2016-096422 [published Online First: 2017/05/16]
51. Wu C, Zheng Y, Duan Y, et al. Nonpharmacological Interventions for Cancer-Related Fatigue: A Systematic Review and Bayesian Network Meta-Analysis. *Worldviews on evidence-based nursing* 2019;16(2):102-10. doi: 10.1111/wvn.12352 [published Online First: 2019/03/29]
52. Lee TYC, Curtin JP. The effects of melatonin prophylaxis on sensory recovery and postoperative pain following orthognathic surgery: a triple-blind randomized controlled trial and biochemical analysis. *International journal of oral and maxillofacial surgery* 2020;49(4):446-53. doi: 10.1016/j.ijom.2019.07.006 [published Online First: 2019/08/20]
53. Lafli Tunay D, Türkeün Ilginel M, Ünlügenç H, et al. Comparison of the effects of preoperative melatonin or vitamin C administration on postoperative analgesia. *Bosnian journal of basic medical sciences* 2020;20(1):117-24. doi: 10.17305/bjbms.2019.4379 [published Online First: 2019/08/30]
54. Keshavarzi F, Mahmoudzadeh F, Brand S, et al. Both melatonin and meloxicam improved sleep and pain in females with primary dysmenorrhea-results from a double-blind cross-over intervention pilot study. *Archives of women's mental health* 2018;21(6):601-09. doi:

- 10.1007/s00737-018-0838-x [published Online First: 2018/04/06]
55. Gandolfi JV, Di Bernardo APA, Chanes DAV, et al. The Effects of Melatonin Supplementation on Sleep Quality and Assessment of the Serum Melatonin in ICU Patients: A Randomized Controlled Trial. *Critical care medicine* 2020;48(12):e1286-e93. doi: 10.1097/ccm.0000000000004690 [published Online First: 2020/10/14]
56. Kirksey MA, Yoo D, Danninger T, et al. Impact of Melatonin on Sleep and Pain After Total Knee Arthroplasty Under Regional Anesthesia With Sedation: A Double-Blind, Randomized, Placebo-Controlled Pilot Study. *The Journal of arthroplasty* 2015;30(12):2370-5. doi: 10.1016/j.arth.2015.06.034 [published Online First: 2015/07/16]
57. Andersen LPH, Gögenur I, Fenger AQ, et al. Analgesic and antihyperalgesic effects of melatonin in a human inflammatory pain model: a randomized, double-blind, placebo-controlled, three-arm crossover study. *Pain* 2015;156(11):2286-94. doi: 10.1097/j.pain.0000000000000284 [published Online First: 2015/07/15]
58. Neufeld NJ, Elnahal SM, Alvarez RH. Cancer pain: a review of epidemiology, clinical quality and value impact. *Future oncology (London, England)* 2017;13(9):833-41. doi: 10.2217/fon-2016-0423 [published Online First: 2016/11/24]
59. Yang J, Wahner-Roedler DL, Zhou X, et al. Acupuncture for palliative cancer pain management: systematic review. *BMJ supportive & palliative care* 2021;11(3):264-70. doi: 10.1136/bmjspcare-2020-002638 [published Online First: 2021/01/15]
60. Satyanarayanan SK, Su H, Lin YW, et al. Circadian Rhythm and Melatonin in the Treatment of Depression. *Curr Pharm Des* 2018;24(22):2549-55. doi: 10.2174/1381612824666180803112304 [published Online First: 2018/08/04]
61. Ali T, Rahman SU, Hao Q, et al. Melatonin prevents neuroinflammation and relieves depression by attenuating autophagy impairment through FOXO3a regulation. *Journal of pineal research* 2020;69(2):e12667. doi: 10.1111/jpi.12667 [published Online First: 2020/05/07]
62. Shabani A, Foroozanfard F, Kavossian E, et al. Effects of melatonin administration on mental health parameters, metabolic and genetic profiles in women with polycystic ovary syndrome: A randomized, double-blind, placebo-controlled trial. *Journal of affective disorders* 2019;250:51-56. doi: 10.1016/j.jad.2019.02.066 [published Online First: 2019/03/05]
63. Daneshvar Kakhaki R, Ostadmohammadi V, Kouchaki E, et al. Melatonin supplementation and the effects on clinical and metabolic status in Parkinson's disease: A randomized, double-blind, placebo-controlled trial. *Clinical neurology and neurosurgery* 2020;195:105878. doi: 10.1016/j.clineuro.2020.105878 [published Online First: 2020/05/18]
64. Ostadmohammadi V, Soleimani A, Bahmani F, et al. The Effects of Melatonin Supplementation on Parameters of Mental Health, Glycemic Control, Markers of Cardiometabolic Risk, and Oxidative Stress in Diabetic Hemodialysis Patients: A Randomized, Double-Blind, Placebo-Controlled Trial. *Journal of renal nutrition : the official journal of the Council on Renal Nutrition of the National Kidney Foundation* 2020;30(3):242-50. doi: 10.1053/j.jrn.2019.08.003 [published Online First: 2019/10/11]
65. Madsen MT, Zahid JA, Hansen CH, et al. The effect of melatonin on depressive symptoms and anxiety in patients after acute coronary syndrome: The MEDACIS randomized clinical trial. *Journal of psychiatric research* 2019;119:84-94. doi: 10.1016/j.jpsychires.2019.09.014 [published Online First: 2019/10/07]
66. Quedsted DJ, Gibson JC, Sharpley AL, et al. Melatonin In Acute Mania Investigation (MIAMI-UK). A



- 1  
2  
3 randomized controlled trial of add-on melatonin in bipolar disorder. *Bipolar disorders*  
4 2021;23(2):176-85. doi: 10.1111/bdi.12944 [published Online First: 2020/06/01]  
5  
6 67. Anderson PM, Lalla RV. Glutamine for Amelioration of Radiation and Chemotherapy Associated  
7 Mucositis during Cancer Therapy. *Nutrients* 2020;12(6) doi: 10.3390/nu12061675 [published  
8 Online First: 2020/06/10]  
9  
10 68. Correa MEP, Cheng KKF, Chiang K, et al. Systematic review of oral cryotherapy for the management  
11 of oral mucositis in cancer patients and clinical practice guidelines. *Supportive care in cancer :  
12 official journal of the Multinational Association of Supportive Care in Cancer* 2020;28(5):2449-  
13 56. doi: 10.1007/s00520-019-05217-x [published Online First: 2019/12/15]  
14  
15 69. Kuba S, Yamanouchi K, Matsumoto M, et al. Study protocol for efficacy and safety of steroid-  
16 containing mouthwash to prevent chemotherapy-induced stomatitis in women with breast  
17 cancer: a multicentre, open-label, randomised phase 2 study. *BMJ open* 2020;10(2):e033446.  
18 doi: 10.1136/bmjopen-2019-033446 [published Online First: 2020/02/16]  
19  
20 70. Akagi S, Fujiwara T, Nishida M, et al. The effectiveness of rebamipide mouthwash therapy for  
21 radiotherapy and chemoradiotherapy-induced oral mucositis in patients with head and neck  
22 cancer: a systematic review and meta-analysis. *Journal of pharmaceutical health care and  
23 sciences* 2019;5:16. doi: 10.1186/s40780-019-0146-2 [published Online First: 2019/08/02]  
24  
25 71. Lissoni P, Chillelli M, Villa S, et al. Five years survival in metastatic non-small cell lung cancer patients  
26 treated with chemotherapy alone or chemotherapy and melatonin: a randomized trial. *J Pineal  
27 Res* 2003;35(1):12-5. doi: 10.1034/j.1600-079x.2003.00032.x [published Online First:  
28 2003/06/26]  
29  
30 72. Shu Z, Li P, Yu B, et al. The effectiveness of probiotics in prevention and treatment of cancer therapy-  
31 induced oral mucositis: A systematic review and meta-analysis. *Oral oncology*  
32 2020;102:104559. doi: 10.1016/j.oraloncology.2019.104559 [published Online First:  
33 2020/01/11]  
34  
35 73. Zadik Y, Arany PR, Fregnani ER, et al. Systematic review of photobiomodulation for the management  
36 of oral mucositis in cancer patients and clinical practice guidelines. *Supportive care in cancer :  
37 official journal of the Multinational Association of Supportive Care in Cancer* 2019;27(10):3969-  
38 83. doi: 10.1007/s00520-019-04890-2 [published Online First: 2019/07/10]  
39  
40 74. Cronshaw M, Parker S, Anagnostaki E, et al. Photobiomodulation and Oral Mucositis: A Systematic  
41 Review. *Dentistry journal* 2020;8(3) doi: 10.3390/dj8030087 [published Online First:  
42 2020/08/09]  
43  
44  
45  
46  
47  
48  
49  
50  
51  
52  
53  
54  
55  
56  
57  
58  
59  
60

1  
2  
3  
4  
5  
6  
7  
8  
9  
10  
11  
12  
13  
14  
15  
16  
17  
18  
19  
20  
21  
22  
23  
24  
25  
26  
27  
28  
29  
30  
31  
32  
33  
34  
35  
36  
37  
38  
39  
40  
41  
42  
43  
44  
45  
46  
47  
48  
49  
50  
51  
52  
53  
54  
55  
56  
57  
58  
59  
60

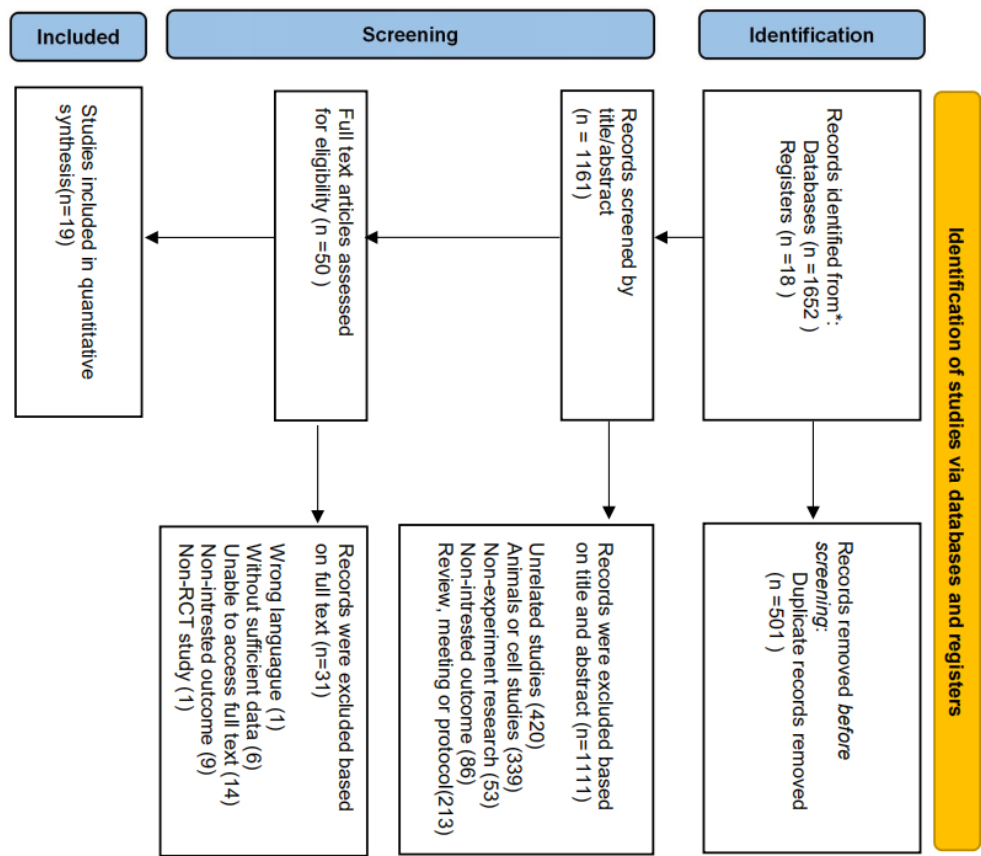

Figure 1 Study flow diagram

362x322mm (57 x 57 DPI)

1  
2  
3  
4  
5  
6  
7  
8  
9  
10  
11  
12  
13  
14  
15  
16  
17  
18  
19  
20  
21  
22  
23  
24  
25  
26  
27  
28  
29  
30  
31  
32  
33  
34  
35  
36  
37  
38  
39  
40  
41  
42  
43  
44  
45  
46  
47  
48  
49  
50  
51  
52  
53  
54  
55  
56  
57  
58  
59  
60

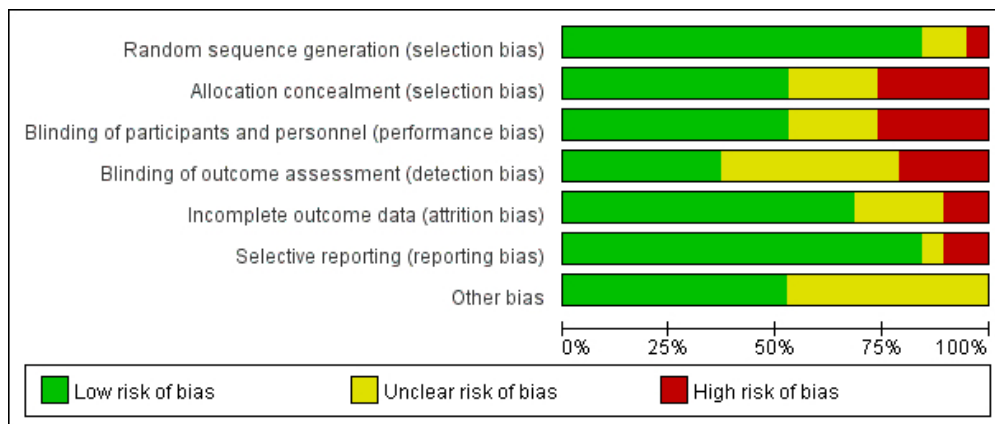

213x90mm (72 x 72 DPI)



1  
2  
3  
4  
5  
6  
7  
8  
9  
10  
11  
12  
13  
14  
15  
16  
17  
18  
19  
20  
21  
22  
23  
24  
25  
26  
27  
28  
29  
30  
31  
32  
33  
34  
35  
36  
37  
38  
39  
40  
41  
42  
43  
44  
45  
46  
47  
48  
49  
50  
51  
52  
53  
54  
55  
56  
57  
58  
59  
60

|                            | Random sequence generation (selection bias) | Allocation concealment (selection bias) | Blinding of participants and personnel (performance bias) | Blinding of outcome assessment (detection bias) | Incomplete outcome data (attrition bias) | Selective reporting (reporting bias) | Other bias |
|----------------------------|---------------------------------------------|-----------------------------------------|-----------------------------------------------------------|-------------------------------------------------|------------------------------------------|--------------------------------------|------------|
| Borbalas et al 2021        | +                                           | ?                                       | ?                                                         | ?                                               | +                                        | +                                    | +          |
| Chen et al 2014            | +                                           | ?                                       | +                                                         | ?                                               | +                                        | +                                    | ?          |
| Elsabagh et al 2019        | -                                           | -                                       | -                                                         | ?                                               | +                                        | +                                    | +          |
| Grutsch et al 2021         | +                                           | +                                       | +                                                         | +                                               | ?                                        | +                                    | ?          |
| Hansen et al 2014          | +                                           | +                                       | +                                                         | -                                               | ?                                        | +                                    | ?          |
| Kurdi et al 2016           | +                                           | +                                       | +                                                         | ?                                               | +                                        | +                                    | +          |
| Madsen et al 2016          | +                                           | +                                       | +                                                         | +                                               | +                                        | +                                    | +          |
| Onseng et al 2017          | +                                           | -                                       | ?                                                         | ?                                               | -                                        | -                                    | ?          |
| P. Lissoni et al 1997      | +                                           | -                                       | -                                                         | -                                               | +                                        | +                                    | ?          |
| P. Lissoni et al 1999      | +                                           | -                                       | -                                                         | -                                               | -                                        | -                                    | ?          |
| P. Lissoni et al 2002      | ?                                           | ?                                       | ?                                                         | ?                                               | +                                        | ?                                    | ?          |
| Palmer et al 2019          | +                                           | +                                       | +                                                         | +                                               | ?                                        | +                                    | +          |
| Palmer et al 2020          | +                                           | +                                       | +                                                         | +                                               | +                                        | +                                    | +          |
| Pashaki et al 2021         | +                                           | +                                       | +                                                         | ?                                               | +                                        | +                                    | ?          |
| Rasmussen et al 2015       | +                                           | +                                       | +                                                         | +                                               | +                                        | +                                    | +          |
| Seely et al 2021           | +                                           | +                                       | +                                                         | +                                               | +                                        | +                                    | +          |
| Shahrokhi et al 2021       | ?                                           | ?                                       | -                                                         | ?                                               | +                                        | +                                    | ?          |
| Sookprasert et al 2014     | +                                           | -                                       | ?                                                         | -                                               | +                                        | +                                    | +          |
| Yennurajalingam et al 2019 | +                                           | +                                       | -                                                         | +                                               | ?                                        | +                                    | +          |

136x321mm (72 x 72 DPI)

1  
2  
3  
4  
5  
6  
7  
8  
9  
10  
11  
12  
13  
14  
15  
16  
17  
18  
19  
20  
21  
22  
23  
24  
25  
26  
27  
28  
29  
30  
31  
32  
33  
34  
35  
36  
37  
38  
39  
40  
41  
42  
43  
44  
45  
46  
47  
48  
49  
50  
51  
52  
53  
54  
55  
56  
57  
58  
59  
60

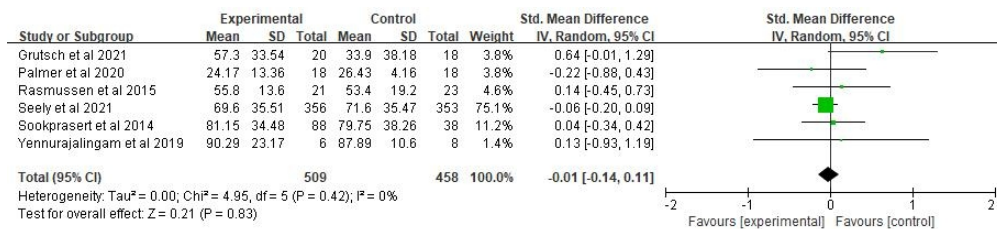

160x36mm (144 x 144 DPI)

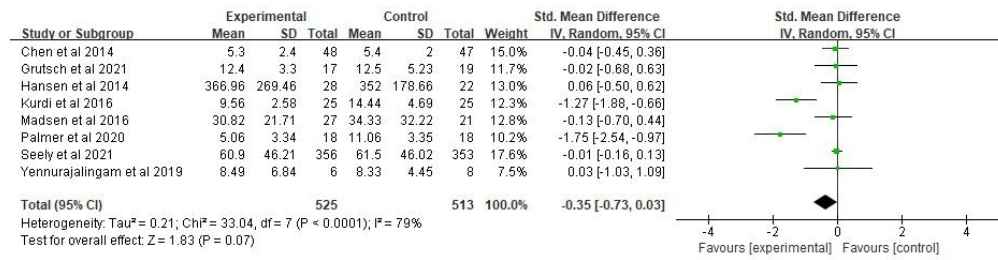

164x42mm (144 x 144 DPI)

1  
2  
3  
4  
5  
6  
7  
8  
9  
10  
11  
12  
13  
14  
15  
16  
17  
18  
19  
20  
21  
22  
23  
24  
25  
26  
27  
28  
29  
30  
31  
32  
33  
34  
35  
36  
37  
38  
39  
40  
41  
42  
43  
44  
45  
46  
47  
48  
49  
50  
51  
52  
53  
54  
55  
56  
57  
58  
59  
60

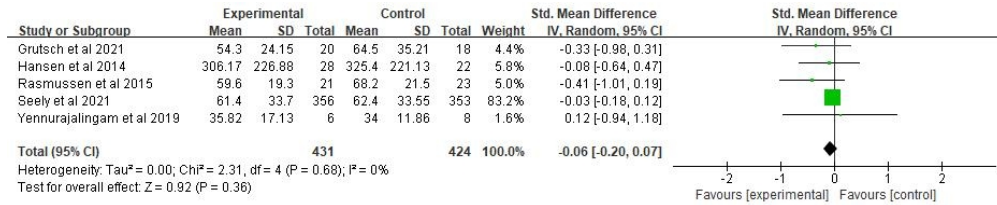

164x33mm (144 x 144 DPI)

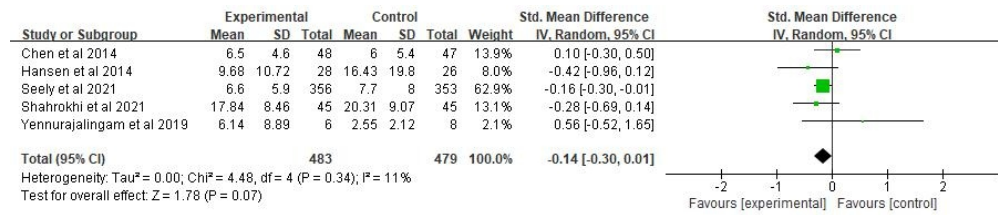

159x33mm (144 x 144 DPI)

1  
2  
3  
4  
5  
6  
7  
8  
9  
10  
11  
12  
13  
14  
15  
16  
17  
18  
19  
20  
21  
22  
23  
24  
25  
26  
27  
28  
29  
30  
31  
32  
33  
34  
35  
36  
37  
38  
39  
40  
41  
42  
43  
44  
45  
46  
47  
48  
49  
50  
51  
52  
53  
54  
55  
56  
57  
58  
59  
60

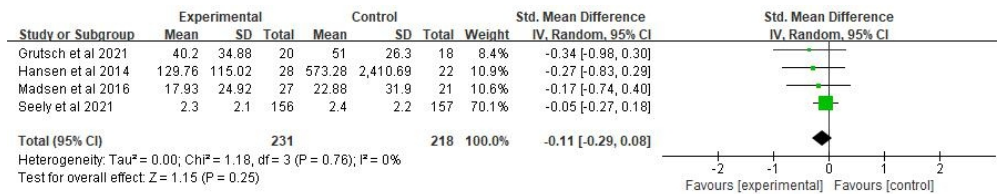

159x31mm (144 x 144 DPI)

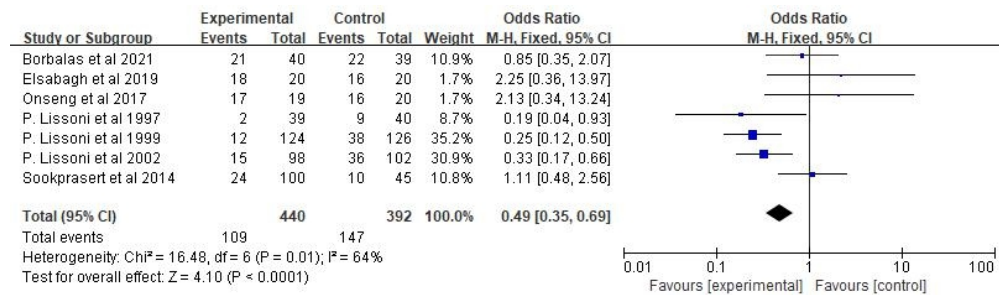

142x42mm (144 x 144 DPI)

1  
2  
3  
4  
5  
6  
7  
8  
9  
10  
11  
12  
13  
14  
15  
16  
17  
18  
19  
20  
21  
22  
23  
24  
25  
26  
27  
28  
29  
30  
31  
32  
33  
34  
35  
36  
37  
38  
39  
40  
41  
42  
43  
44  
45  
46  
47  
48  
49  
50  
51  
52  
53  
54  
55  
56  
57  
58  
59  
60

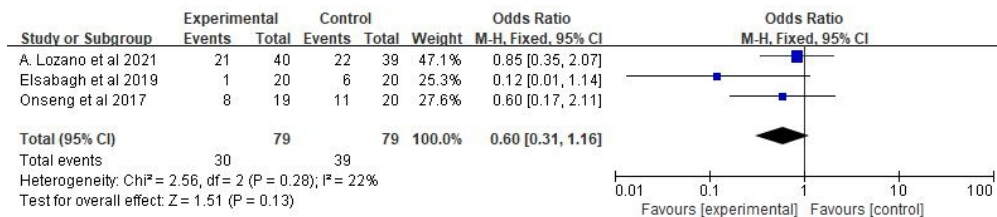

139x31mm (144 x 144 DPI)



**Search strategy**

#10 TS=(randomized controlled trial OR randomized OR placebo OR trial OR controlled)

#9 TS=(sleep disorder OR Insomnia OR sleep dysfunction OR Sleeplessness)

#8 TS=(Quality of life OR Life Quality OR Health Related Quality Of Life OR HRQOL OR QOL)

#7 TS=(Appetite\* OR Alteration\*)

#6 TS=(Depression\* OR Depressive)

#5 TS=(oral mucositis OR Mucosities OR stomatitis)

#4 TS=(fatigue OR Lassitude)

#3 TS=(Pain)

#2 TS=(melatonin)

#1 TS=(neoplasm OR Neoplasia\* OR Tumor\* OR Cancer\* OR Malignancy OR Malignancies)

#11 ((((((#9) OR #8) OR #7) OR #6) OR #5) OR #4) OR #3

#12 (((#11) AND #10) AND #1) AND #2

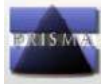

## PRISMA 2020 Checklist

1  
2  
3  
4  
5  
6  
7  
8  
9  
10  
11  
12  
13  
14  
15  
16  
17  
18  
19  
20  
21  
22  
23  
24  
25  
26  
27  
28  
29  
30  
31  
32  
33  
34  
35  
36  
37  
38  
39  
40  
41  
42  
43  
44  
45  
46  
47

| Section and Topic             | Item # | Checklist item                                                                                                                                                                                                                                                                                       | Location where item is reported  |
|-------------------------------|--------|------------------------------------------------------------------------------------------------------------------------------------------------------------------------------------------------------------------------------------------------------------------------------------------------------|----------------------------------|
| <b>TITLE</b>                  |        |                                                                                                                                                                                                                                                                                                      |                                  |
| Title                         | 1      | Identify the report as a systematic review.                                                                                                                                                                                                                                                          | Page 1 in "Title"                |
| <b>ABSTRACT</b>               |        |                                                                                                                                                                                                                                                                                                      |                                  |
| Abstract                      | 2      | See the PRISMA 2020 for Abstracts checklist.                                                                                                                                                                                                                                                         | Page 1 in "Abstract"             |
| <b>INTRODUCTION</b>           |        |                                                                                                                                                                                                                                                                                                      |                                  |
| Rationale                     | 3      | Describe the rationale for the review in the context of existing knowledge.                                                                                                                                                                                                                          | Page 2 in "Introduction"         |
| Objectives                    | 4      | Provide an explicit statement of the objective(s) or question(s) the review addresses.                                                                                                                                                                                                               | Page 2 in "Introduction"         |
| <b>METHODS</b>                |        |                                                                                                                                                                                                                                                                                                      |                                  |
| Eligibility criteria          | 5      | Specify the inclusion and exclusion criteria for the review and how studies were grouped for the syntheses.                                                                                                                                                                                          | Page 3 in "Eligibility criteria" |
| Information sources           | 6      | Specify all databases, registers, websites, organisations, reference lists and other sources searched or consulted to identify studies. Specify the date when each source was last searched or consulted.                                                                                            | Page 3 in "Search strategy"      |
| Search strategy               | 7      | Present the full search strategies for all databases, registers and websites, including any filters and limits used.                                                                                                                                                                                 | Page 3 in "Search strategy"      |
| Selection process             | 8      | Specify the methods used to decide whether a study met the inclusion criteria of the review, including how many reviewers screened each record and each report retrieved, whether they worked independently, and if applicable, details of automation tools used in the process.                     | Page 3 in "Data extraction"      |
| Data collection process       | 9      | Specify the methods used to collect data from reports, including how many reviewers collected data from each report, whether they worked independently, any processes for obtaining or confirming data from study investigators, and if applicable, details of automation tools used in the process. | Page 3 in "Data extraction"      |
| Data items                    | 10a    | List and define all outcomes for which data were sought. Specify whether all results that were compatible with each outcome domain in each study were sought (e.g. for all measures, time points, analyses), and if not, the methods used to decide which results to collect.                        | Page 3 in "Data extraction"      |
|                               | 10b    | List and define all other variables for which data were sought (e.g. participant and intervention characteristics, funding sources). Describe any assumptions made about any missing or unclear information.                                                                                         | Page 5-6 in "table 1"            |
| Study risk of bias assessment | 11     | Specify the methods used to assess risk of bias in the included studies, including details of the tool(s) used, how many reviewers assessed each study and whether they worked independently, and if applicable, details of automation tools used in the process.                                    | Page 4 in "Quality assessment"   |
| Effect measures               | 12     | Specify for each outcome the effect measure(s) (e.g. risk ratio, mean difference) used in the synthesis or presentation of results.                                                                                                                                                                  | Page 3 in "Data analysis"        |
| Synthesis methods             | 13a    | Describe the processes used to decide which studies were eligible for each synthesis (e.g. tabulating the study intervention characteristics and comparing against the planned groups for each synthesis (item #5)).                                                                                 | Page 3 in "Data analysis"        |
|                               | 13b    | Describe any methods required to prepare the data for presentation or synthesis, such as handling of missing summary statistics, or data                                                                                                                                                             | Page 3 in                        |

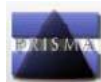

## PRISMA 2020 Checklist

| Section and Topic             | Item # | Checklist item                                                                                                                                                                                                                                                                       | Location where item is reported        |
|-------------------------------|--------|--------------------------------------------------------------------------------------------------------------------------------------------------------------------------------------------------------------------------------------------------------------------------------------|----------------------------------------|
|                               |        | conversions.                                                                                                                                                                                                                                                                         | "Data analysis"                        |
|                               | 13c    | Describe any methods used to tabulate or visually display results of individual studies and syntheses.                                                                                                                                                                               | Page 3 in "Data analysis"              |
|                               | 13d    | Describe any methods used to synthesize results and provide a rationale for the choice(s). If meta-analysis was performed, describe the model(s), method(s) to identify the presence and extent of statistical heterogeneity, and software package(s) used.                          | Page 3 in "Data analysis"              |
|                               | 13e    | Describe any methods used to explore possible causes of heterogeneity among study results (e.g. subgroup analysis, meta-regression).                                                                                                                                                 | Page 3 in "Data analysis"              |
|                               | 13f    | Describe any sensitivity analyses conducted to assess robustness of the synthesized results.                                                                                                                                                                                         | Page 3 in "Data analysis"              |
| Reporting bias assessment     | 14     | Describe any methods used to assess risk of bias due to missing results in a synthesis (arising from reporting biases).                                                                                                                                                              | Page 3 in "Data analysis"              |
| Certainty assessment          | 15     | Describe any methods used to assess certainty (or confidence) in the body of evidence for an outcome.                                                                                                                                                                                | Page 3 in "Risk of bias assessment"    |
| <b>RESULTS</b>                |        |                                                                                                                                                                                                                                                                                      |                                        |
| Study selection               | 16a    | Describe the results of the search and selection process, from the number of records identified in the search to the number of studies included in the review, ideally using a flow diagram.                                                                                         | Page 4 in "Literature search"          |
|                               | 16b    | Cite studies that might appear to meet the inclusion criteria, but which were excluded, and explain why they were excluded.                                                                                                                                                          | Page 4 in "Literature search"          |
| Study characteristics         | 17     | Cite each included study and present its characteristics.                                                                                                                                                                                                                            | Page 4 in "Literature characteristics" |
| Risk of bias in studies       | 18     | Present assessments of risk of bias for each included study.                                                                                                                                                                                                                         | Page 4 in "Quality assessment"         |
| Results of individual studies | 19     | For all outcomes, present, for each study: (a) summary statistics for each group (where appropriate) and (b) an effect estimate and its precision (e.g. confidence/credible interval), ideally using structured tables or plots.                                                     | Page 4 in "Literature characteristics" |
| Results of syntheses          | 20a    | For each synthesis, briefly summarise the characteristics and risk of bias among contributing studies.                                                                                                                                                                               | Page 4 in "Quality assessment"         |
|                               | 20b    | Present results of all statistical syntheses conducted. If meta-analysis was done, present for each the summary estimate and its precision (e.g. confidence/credible interval) and measures of statistical heterogeneity. If comparing groups, describe the direction of the effect. | Page 7-9                               |
|                               | 20c    | Present results of all investigations of possible causes of heterogeneity among study results.                                                                                                                                                                                       | Page 7-9                               |
|                               | 20d    | Present results of all sensitivity analyses conducted to assess the robustness of the synthesized results.                                                                                                                                                                           | Page 7-9                               |
| Reporting biases              | 21     | Present assessments of risk of bias due to missing results (arising from reporting biases) for each synthesis assessed.                                                                                                                                                              | Page 7-9                               |
| Certainty of                  | 22     | Present assessments of certainty (or confidence) in the body of evidence for each outcome assessed.                                                                                                                                                                                  | Page 7-9                               |



## PRISMA 2020 Checklist

1  
2  
3  
4  
5  
6  
7  
8  
9  
10  
11  
12  
13  
14  
15  
16  
17  
18  
19  
20  
21  
22  
23  
24  
25  
26  
27  
28  
29  
30  
31  
32  
33  
34  
35  
36  
37  
38  
39  
40  
41  
42  
43  
44  
45  
46  
47

| Section and Topic                              | Item # | Checklist item                                                                                                                                                                                                                             | Location where item is reported |
|------------------------------------------------|--------|--------------------------------------------------------------------------------------------------------------------------------------------------------------------------------------------------------------------------------------------|---------------------------------|
| evidence                                       |        |                                                                                                                                                                                                                                            |                                 |
| <b>DISCUSSION</b>                              |        |                                                                                                                                                                                                                                            |                                 |
| Discussion                                     | 23a    | Provide a general interpretation of the results in the context of other evidence.                                                                                                                                                          | Page 9-12                       |
|                                                | 23b    | Discuss any limitations of the evidence included in the review.                                                                                                                                                                            | Page 9-12                       |
|                                                | 23c    | Discuss any limitations of the review processes used.                                                                                                                                                                                      | Page 9-12                       |
|                                                | 23d    | Discuss implications of the results for practice, policy, and future research.                                                                                                                                                             | Page 9-12                       |
| <b>OTHER INFORMATION</b>                       |        |                                                                                                                                                                                                                                            |                                 |
| Registration and protocol                      | 24a    | Provide registration information for the review, including register name and registration number, or state that the review was not registered.                                                                                             | Page 2 in "method"              |
|                                                | 24b    | Indicate where the review protocol can be accessed, or state that a protocol was not prepared.                                                                                                                                             | Page 2 in "method"              |
|                                                | 24c    | Describe and explain any amendments to information provided at registration or in the protocol.                                                                                                                                            | Page 2 in "method"              |
| Support                                        | 25     | Describe sources of financial or non-financial support for the review, and the role of the funders or sponsors in the review.                                                                                                              | Page 13 in "Footnotes"          |
| Competing interests                            | 26     | Declare any competing interests of review authors.                                                                                                                                                                                         | Page 13 in "Footnotes"          |
| Availability of data, code and other materials | 27     | Report which of the following are publicly available and where they can be found: template data collection forms; data extracted from included studies; data used for all analyses; analytic code; any other materials used in the review. | Page 13 in "Footnotes"          |

From: Page MJ, McKenzie JE, Bossuyt PM, Boutron I, Hoffmann TC, Mulrow CD, et al. The PRISMA 2020 statement: an updated guideline for reporting systematic reviews. *BMJ* 2021;372:n71. doi: 10.1136/bmj.n71

For more information, visit: <http://www.prisma-statement.org/>

# BMJ Open

## Effect of melatonin on quality of life and symptoms in patients with cancer: a systematic review and meta-analysis of randomized controlled trials

|                                 |                                                                                                                                                                                                                                                                                                                                                                                                                                                                                                                                                                                                                                                                                                                                                                                                                                                                                                                                                                                                                                                                                                                        |
|---------------------------------|------------------------------------------------------------------------------------------------------------------------------------------------------------------------------------------------------------------------------------------------------------------------------------------------------------------------------------------------------------------------------------------------------------------------------------------------------------------------------------------------------------------------------------------------------------------------------------------------------------------------------------------------------------------------------------------------------------------------------------------------------------------------------------------------------------------------------------------------------------------------------------------------------------------------------------------------------------------------------------------------------------------------------------------------------------------------------------------------------------------------|
| Journal:                        | <i>BMJ Open</i>                                                                                                                                                                                                                                                                                                                                                                                                                                                                                                                                                                                                                                                                                                                                                                                                                                                                                                                                                                                                                                                                                                        |
| Manuscript ID                   | bmjopen-2022-060912.R1                                                                                                                                                                                                                                                                                                                                                                                                                                                                                                                                                                                                                                                                                                                                                                                                                                                                                                                                                                                                                                                                                                 |
| Article Type:                   | Original research                                                                                                                                                                                                                                                                                                                                                                                                                                                                                                                                                                                                                                                                                                                                                                                                                                                                                                                                                                                                                                                                                                      |
| Date Submitted by the Author:   | 01-Apr-2022                                                                                                                                                                                                                                                                                                                                                                                                                                                                                                                                                                                                                                                                                                                                                                                                                                                                                                                                                                                                                                                                                                            |
| Complete List of Authors:       | <p>Fan, Rongrong; Hunan Cancer Hospital/Affiliated Cancer Hospital of Xiangya nursing school of Central South University, Changsha, China/Xiangya Center for Evidence-Based Practice &amp; Healthcare Innovation: A Joanna Briggs Institute Affiliated Group, Department of Nursing Teaching and Research</p> <p>Bu, Xiaofan; Xiangya nursing school of Central South University, Changsha, China/Xiangya Center for Evidence-Based Practice &amp; Healthcare Innovation: A Joanna Briggs Institute Affiliated Group</p> <p>Yang, Siyu; Hunan Cancer Hospital</p> <p>Tan, Yan; Hunan Cancer Hospital, Department of Gastrointestinal surgery</p> <p>Wang, Tongyu; Hunan Cancer Hospital, Department of Nursing Teaching and Research</p> <p>Chen, Hongyun; Hunan Cancer Hospital, Department of Nursing Teaching and Research</p> <p>LI, Xuying; Hunan Cancer Hospital/Affiliated Cancer Hospital of Xiangya nursing school of Central South University, Changsha, China/Xiangya Center for Evidence-Based Practice &amp; Healthcare Innovation: A Joanna Briggs Institute Affiliated Group, Department of Nursing</p> |
| <b>Primary Subject Heading</b>: | Complementary medicine                                                                                                                                                                                                                                                                                                                                                                                                                                                                                                                                                                                                                                                                                                                                                                                                                                                                                                                                                                                                                                                                                                 |
| Secondary Subject Heading:      | Complementary medicine, Evidence based practice                                                                                                                                                                                                                                                                                                                                                                                                                                                                                                                                                                                                                                                                                                                                                                                                                                                                                                                                                                                                                                                                        |
| Keywords:                       | Adult oncology < ONCOLOGY, Pharmacology < TROPICAL MEDICINE, CLINICAL PHARMACOLOGY                                                                                                                                                                                                                                                                                                                                                                                                                                                                                                                                                                                                                                                                                                                                                                                                                                                                                                                                                                                                                                     |
|                                 |                                                                                                                                                                                                                                                                                                                                                                                                                                                                                                                                                                                                                                                                                                                                                                                                                                                                                                                                                                                                                                                                                                                        |

SCHOLARONE™  
Manuscripts



I, the Submitting Author has the right to grant and does grant on behalf of all authors of the Work (as defined in the below author licence), an exclusive licence and/or a non-exclusive licence for contributions from authors who are: i) UK Crown employees; ii) where BMJ has agreed a CC-BY licence shall apply, and/or iii) in accordance with the terms applicable for US Federal Government officers or employees acting as part of their official duties; on a worldwide, perpetual, irrevocable, royalty-free basis to BMJ Publishing Group Ltd ("BMJ") its licensees and where the relevant Journal is co-owned by BMJ to the co-owners of the Journal, to publish the Work in this journal and any other BMJ products and to exploit all rights, as set out in our [licence](#).

The Submitting Author accepts and understands that any supply made under these terms is made by BMJ to the Submitting Author unless you are acting as an employee on behalf of your employer or a postgraduate student of an affiliated institution which is paying any applicable article publishing charge ("APC") for Open Access articles. Where the Submitting Author wishes to make the Work available on an Open Access basis (and intends to pay the relevant APC), the terms of reuse of such Open Access shall be governed by a Creative Commons licence – details of these licences and which [Creative Commons](#) licence will apply to this Work are set out in our licence referred to above.

Other than as permitted in any relevant BMJ Author's Self Archiving Policies, I confirm this Work has not been accepted for publication elsewhere, is not being considered for publication elsewhere and does not duplicate material already published. I confirm all authors consent to publication of this Work and authorise the granting of this licence.

1  
2  
3 **Effect of melatonin on quality of life and symptoms in patients with cancer: a systematic**  
4 **review and meta-analysis of randomized controlled trials**  
5  
6

7 Rongrong Fan<sup>1</sup>, Xiaofan Bu<sup>2</sup>, Siyu Yang<sup>3</sup>, Yan Tan<sup>4</sup>, Tongyu Wang<sup>5</sup>, Hongyun Chen<sup>6</sup>, Xuying Li<sup>7\*</sup>  
8  
9

10 **Affiliations**

11 1 Master, Department of Nursing Teaching and Research, Hunan Cancer Hospital/Affiliated Cancer  
12 Hospital of Xiangya nursing school of Central South University, Changsha, China.  
13  
14

15 2 Master, Xiangya nursing school of Central South University, Changsha, China.  
16  
17

18 3 Master, Department of Nursing Teaching and Research, Hunan Cancer Hospital/Affiliated Cancer  
19 Hospital of Xiangya nursing school of Central South University, Changsha, China.  
20  
21

22 4 Master, Department of Gastrointestinal surgery, Hunan Cancer Hospital/Affiliated Cancer Hospital of  
23 Xiangya nursing school of Central South University, Changsha, China.  
24  
25

26 5 Master, Department of Nursing Teaching and Research, Hunan Cancer Hospital/Affiliated Cancer  
27 Hospital of Xiangya nursing school of Central South University, Changsha, China.  
28  
29

30 6 Master, Department of Nursing Teaching and Research, Hunan Cancer Hospital/Affiliated Cancer  
31 Hospital of Xiangya nursing school of Central South University, Changsha, China.  
32  
33

34 7 PHD, Department of Nursing, Hunan Cancer Hospital/Affiliated Cancer Hospital of Xiangya nursing  
35 school of Central South University, Changsha, China. Electronic address: lixuying@hnca.org.cn  
36  
37  
38  
39

40 **Abstract**

41 **Objective** The study was to systematically review the effect of the melatonin on quality of life  
42 (QoL) and symptoms among cancer patients.  
43  
44

45 **Design** Systematic review and meta-analysis.  
46  
47

48 **Data sources** Cochrane Library, PubMed, Embase, Web of Science, Medline, CINAHL, Scopus,  
49 Clinical Trials.gov, China Biology Medicine (CBM), ProQuest and Open Gray were researched  
50 from inception through November 2021.  
51  
52

53 **Eligibility criteria** We included randomized controlled trials (RCTs) assessing the effects of  
54 melatonin on QoL, sleep quality, fatigue, depression, pain, rate of stomatitis and its severity in  
55 adult patients with cancer, without language restrictions. Researches that reported the effects of  
56 melatonin along with other interventions and lacked of interested data for meta-analytic synthesis  
57  
58  
59  
60

1  
2  
3 were excluded.  
4

5  
6 **Data extraction and synthesis** Two independent reviewers extracted data and another two  
7 reviewers assessed risk of bias. The mean difference or standard mean difference with 95% CIs  
8 was used in the computation of continuous variables to synthesis data. Odds ratio was used for  
9 dichotomous outcomes. Heterogeneity was assessed and quantified ( $I^2$  statistic).  
10  
11

12 **Results** A total of 19 qualified studies that included 2101 cancer patients (melatonin: 1078,  
13 control: 1023) were included in the meta-analysis. Results indicated that melatonin had no  
14 significant effect on QoL [SMD = -0.01, 95% CI (-0.14, 0.11), P = 0.83], fatigue [SMD = -0.34,  
15 95% CI (-0.73, 0.06), P = 0.10], pain [SMD = -0.34, 95% CI (-0.7, 0.02), P = 0.06], stomatitis  
16 incidence [OR = 0.59, 95% CI (0.31, 1.13), P = 0.11] and severity of stomatitis [OR = 0.6, 95% CI  
17 (0.31, 1.16), P = 0.13]. MLT could reduce stomatitis rate among patients with metastatic solid  
18 tumor [OR = 0.28, 95% CI (0.17, 0.44), P < 0.0001], while it failed in patients with head and neck  
19 cancer [OR = 1.15, 95% CI (0.56, 2.4), P = 0.7]. MLT eased the depression in patients who  
20 received administration greater than 14 days [SMD = -0.14, 95% CI (-0.27, -0.01), P = 0.03] and  
21 those who underwent operation [SMD = -0.17, 95% CI (-0.32, -0.03), P = 0.02]. It improved sleep  
22 quality [SMD = -0.78, 95% CI (-1.47, -0.10), P = 0.02], though with large heterogeneity ( $I^2$  =  
23 94%, P < 0.001).  
24  
25  
26  
27  
28  
29  
30

31 **Conclusion** Finding showed that MLT could not improve the QoL, fatigue, pain and stomatitis  
32 severity among patients with cancer. However, it has limited effect on decreasing the stomatitis  
33 rate, easing the depression and improving sleep quality. Different treatments, duration and cancer  
34 types were the main source of heterogeneity. Further large-scale RCTs are urgently required.  
35 Besides, the effect of different combination of MLT dosage and duration, administration type and  
36 joint measures are worthy of further study.  
37  
38  
39  
40

#### 41 **PROSPERO registration number**

42  
43 CRD42021292855.  
44

#### 45 **Strengths and limitations of this study**

- 46  
47
- 48 ● This systematic review was registered a priori and conducted in line with Preferred Reporting  
49 Items for Systematic Reviews and Meta-Analysis and the recommendations of the Cochrane  
50 Collaboration.  
51
  - 52 ● Most of the studies were of high quality with a low risk of bias, which could further lend  
53 confidence to the current pooled results.  
54
  - 55 ● We widely explored the effectiveness of MLT in different population, treatment, dosage,  
56  
57  
58



1  
2  
3 duration, administration time in subgroup analysis.

- 4  
5  
6 ● For every dimension of MLT including QoL, sleep, fatigue, depression, pain and stomatitis,  
7 the literatures are limited, which limits the generality of the conclusion.  
8  
9  
10 ● The main significant results were from subgroup analysis of the limited studies and the  
11 results should be interpreted prudently  
12

13 **Key words:** cancer patients, symptoms, QoL, melatonin, meta-analysis  
14  
15

## 16 17 18 **Introduction**

19  
20 Melatonin (MLT) is an important endogenous indolamine that is synthesized and secreted into the  
21 systemic circulation and cerebrospinal fluid by the pineal gland, which has recognized anti-aging,  
22 anti-inflammatory, and anti-oxidant properties.<sup>1</sup> As a strong anti-fibrotic activity,<sup>2</sup> MLT can be  
23 used as a desired preconditioning agent in cell-based therapy.<sup>3 4</sup> It also has a substantial role to  
24 regulate the circadian rhythm and sleep during the night.<sup>5 6</sup> Recent studies proved the effect of  
25 MLT on limiting skeletal muscle frailty, prolonging physical performance,<sup>7</sup> and preventing bone  
26 loss.<sup>8</sup> In the oncology field, MLT has significant apoptotic, angiogenic, oncostasis, and anti-  
27 proliferative effects on various oncological cells.<sup>9</sup> It was proved that low levels of MLT might be  
28 a risk factor for breast cancer.<sup>10</sup> Meanwhile, MLT's co-administration improves the sensitivity of  
29 cancers to inhibition by conventional drugs, and reduces the toxic consequences of anti-cancer  
30 drugs while increases their efficacy.<sup>11</sup> There is major concern about the symptoms induced by  
31 cancer and cancer treatment that patients encounter, including physical symptoms and  
32 psychological/spiritual distress,<sup>12</sup> leading to decreased QoL. Equally, MLT play an important role  
33 in enhancing QoL through improving survival and decreasing symptoms.<sup>13</sup> The positive  
34 association between MLT and various health outcomes in cancer patients were be shown in some  
35 researches.<sup>14</sup> A recent meta-analysis revealed that MLT may benefit cancer patients by improving  
36 survival and ameliorating the side effects of chemotherapy.<sup>15</sup> Palmer et al showed the  
37 neuroprotective effect of MLT to counteract the adverse effects of chemotherapy on cognitive  
38 function, sleep quality and depressive symptoms in breast cancer patients.<sup>16</sup> A recent clinical trial  
39 drawn a conclusion that MLT supply decreased the levels of fatigue in patients with breast  
40 cancer.<sup>17</sup> However, some of the recent findings published suggest the conflicting results<sup>18 19</sup> that  
41 MLT intervention cannot improve the QoL, release the symptoms burden, or presented the  
42 uncertain results.<sup>20</sup> We are not aware of any systematic reviews and meta-analyses that have  
43 synthesized the evidence of the function of MLT on cancer patients. The real effect of MLT on  
44 health outcomes in cancer group remains unspecific and ambiguous. Thus, with accumulating  
45 evidence, we perform a systematic review and meta-analysis of RCTs to investigate the roles of  
46  
47  
48  
49  
50  
51  
52  
53  
54  
55  
56  
57  
58  
59  
60

1  
2  
3 MLT in improving QoL and symptoms in patients with cancer.  
4  
5  
6  
7

## 8 **Methods**

9  
10 This review was conducted in accordance with the Preferred Reporting Items for Systematic  
11 Reviews and Meta-Analyses guidelines (PRISMA) and the recommendations of the Cochrane  
12 Collaboration. The study was registered in PROSPERO with a registration number of  
13 CRD42021292855.  
14  
15  
16

### 17 **Search strategy**

18  
19 A throughout search was conducted in Cochrane Library, PubMed, Embase, Web of Science,  
20 Medline, CINAHL, Scopus, ClinicalTrials.gov, and China Biology Medicine (CBM) from  
21 inception through November 2021 for RCTs without language restrictions. Sources of unpublished  
22 studies and gray literature to be searched through ProQuest and Open Gray. We used medical  
23 subject headings (MeSH) and text words to identify the potential interest studies. Search strategies  
24 were provided in supplemental file 1.  
25  
26  
27  
28  
29  
30  
31  
32  
33

### 34 **Eligibility criteria**

#### 35 **Participants**

36  
37 Studies including adult patients ( $\geq 18$  years) who were diagnosed with cancer according to National  
38 Cancer Institute codes, regardless of cancer type, cancer stage (early, middle or advanced), and  
39 current treatment (radiation therapy, chemotherapy, surgery, targeted therapy, immunotherapy and  
40 so on, combination of any above treatment, or without any treatment), were eligible.  
41  
42  
43  
44

#### 45 **Interventions and controls**

46  
47 All trials that reported and evaluated effects of MLT were included. Literature excluded if they met  
48 the following criteria:(1) they were not RCTs; (2) studied the effects of MLT along with other  
49 interventions (3) lacked of sufficient data on interested outcomes.  
50  
51  
52

#### 53 **Outcomes**

54  
55 Primary outcome was QoL. The scores of sleep quality, fatigue, depression, and pain, rate of  
56 stomatitis and its severity were the secondary outcome.  
57  
58  
59  
60

## Studies

Only RCTs were eligible.

## Data extraction

Two independent researchers (Siyu Yang, Tongyu Wang) extracted the data, evaluated the quality of eligible studies, and performed double-checks. Any disagreements and differences were resolved by a third independent investigator (Xiaofan Bu). The following data from the full text of selected studies were extracted: first author's name, year of publication, the characteristics of the patients, the characteristics of the intervention and the control groups (study design, form of intervention, dose of melatonin supplementation, study duration), number of participants in each group and outcome results (means and standard deviations for continuous data; number of incidents for dichotomous data).

## Risk of bias assessment

Two reviewers (Yan Tan, Hongyun Chen) independently evaluated the risk of bias for each eligible study using the Cochrane assessment tool, which consists of the following seven domains: "random sequence generation, allocation concealment, blinding of participants and personnel, blinding of outcome assessment, incomplete outcome data, selective reporting, and other bias". Each question can be rated as follows: yes (+), low risk of bias; unclear (?), unclear risk of bias; no (-), high risk of bias. Any disagreement between the reviewers was resolved by discussion until consensus was reached.

## Data analysis

The meta-analysis was performed using Review Manager Software (version 5.3). The effect of MLT on scores of QoL and symptoms were estimated by mean difference (MD) when trials measured an outcome using the same measurement method or scale. We used standard mean difference (SMD) when trials used different instruments to measure the same outcome. For dichotomous outcomes (such as stomatitis and its severity), we used odds ratio (OR). The effect size (ES) and the 95% confidence interval (CI) for primary and secondary outcomes were computed. The ES with scores of 0.2–0.5, 0.5–0.8, and > 0.8 were considered small, medium, and large effects, respectively. Forest plots were used to display the pooled ES, 95% CI, weight in percentage. If variability was presented by measures other than mean or SD, we used standard approaches for estimating data. If the studies

1  
2  
3 did not report SD, we used the following formula to calculate missing SD:  $SD = \sqrt{N \times (\text{Upper 95\% CI} - \text{Lower 95\% CI}) / 3.92}$ . If a study provided medians and interquartile ranges (IQR), we transformed  
4 median and IQR to mean and SD by a method for non-normal data.<sup>21</sup>  $I^2$  was used to measure the  
5 statistical heterogeneity among the trials in each analysis. If  $P > 0.1$  and  $I^2 < 50\%$ , a fixed-effects  
6 model was adopted; if  $P < 0.1$  and  $I^2 \geq 50\%$ , then a random-effects model was adopted. If  
7 heterogeneity was identified, subgroup analyses were conducted on different cancer type, treatment,  
8 dosage, administration time and duration. In subgroup analyses, considering that these variables  
9 might have influences on the outcomes if there were at least two studies on a stratum. Sensitivity  
10 analysis was performed in light of the fact that some of the trials might impact the study results by  
11 removing studies with high or unclear risk of bias. Reporting and publication bias were investigated  
12 by visually examining the degree of asymmetry of a funnel plot.  
13  
14  
15  
16  
17  
18  
19  
20  
21  
22

### 23 **Patient and public involvement**

24  
25 No patient was involved.  
26  
27  
28  
29

## 30 **Results**

### 31 **Literature search**

32  
33 The initial search identified 1670 publications through Pubmed, Embase, Medline, Scopus,  
34 Sinomed, Web of science, Cochrane, and clinical trial. After excluding 501 duplicates, a total of  
35 1161 studies were retrieved for title and abstract screening. After screening for title and abstract,  
36 1111 articles were excluded and 50 papers were retrieved for full text review. Out of 50 retrieved  
37 papers, 1 article was excluded due to wrong language,<sup>22</sup> 6 articles were excluded without sufficient  
38 data, 14 articles were excluded without full text, 9 articles were excluded without target outcome, 1  
39 article was excluded due to non-RCT study.<sup>23</sup> Therefore, a total of 19 articles were included in the  
40 final meta-analysis.<sup>24-42</sup> The flow chart of literature search is shown in Fig. 1.  
41  
42  
43  
44  
45  
46  
47  
48  
49

### 50 **Quality assessment**

51  
52 We used Cochrane scoring system to assess the quality of the included studies. Two reviewers had  
53 different opinions on bias in one article in “incomplete outcome data”, one article in “selective  
54 reporting”. Through the discussion, final consensus was achieved. The overall risk of bias as shown  
55 was moderate (Fig. 2). Nearly all studies reported appropriate random sequence generation. Most  
56 studies reported completed data and had low risk of bias on the item ‘Selective reporting’. Almost  
57  
58  
59  
60

a third of the studies did not report the blindness in outcome assessment. The individual risk of bias for each study is presented in Fig. 3.

### Literature characteristics

The characteristics of the patients, interventions, controls, and outcome measures are shown in Table 1.

**Table 1 The characteristics of the literature**

| Author                    | Year | Population                                                                        | Mean age<br>(Intervention/<br>control) | Study<br>design | Time of duration                                                                                   | Administration<br>time     | Intervention<br>group            | Control<br>group          | Outcome                                                                 | Intervention<br>(N) | Control<br>(N) |
|---------------------------|------|-----------------------------------------------------------------------------------|----------------------------------------|-----------------|----------------------------------------------------------------------------------------------------|----------------------------|----------------------------------|---------------------------|-------------------------------------------------------------------------|---------------------|----------------|
| P. Lissoni <sup>31</sup>  | 1997 | Patients with metastatic solid tumors under chemotherapy                          | 61/58                                  | RCTs            | Every day without a break until disease progression                                                | At the evening of each day | 20 mg oral MLT                   | Placebo                   | Stomatitis rate                                                         | 39                  | 40             |
| P. Lissoni <sup>30</sup>  | 1999 | Patients with metastatic solid tumour under chemotherapy                          | 53/56                                  | RCTs            | 7 days prior to chemotherapy, continued after chemotherapy interruption, until disease progression | Every night                | 20 mg oral MLT                   | Placebo                   | Stomatitis rate                                                         | 124                 | 126            |
| P. Lissoni <sup>29</sup>  | 2002 | Untreated patients with metastatic solid tumors under chemotherapy                | 66/65                                  | RCTs            | At least 2 months                                                                                  | At the evening of each day | 20 mg oral MLT plus support care | Placebo plus support care | Stomatitis rate                                                         | 98                  | 102            |
| Hansen <sup>27</sup>      | 2014 | Patients undergoing breast cancer surgery                                         | 51/60                                  | RCTs            | 10days: 2 days preoperatively till 8 days postoperatively                                          | One hour before bedtime    | 6 mg oral MLT                    | Placebo                   | Depression (MDI), Sleepiness (KSS, VAS), Fatigue (VAS), Pain (VAS)      | 28                  | 26             |
| Chen <sup>24</sup>        | 2014 | Breast cancer survivors                                                           | 59/59                                  | RCTs            | 4 months                                                                                           | Each night at 9 pm         | 3 mg oral MLT                    | Placebo                   | Sleep (PSQI), depression (CES-D)                                        | 48                  | 47             |
| Sookprasert <sup>41</sup> | 2014 | Patients with non-small cell lung cancer receiving chemotherapy                   | 56.8/55.6                              | RCTs            | 2 months: during chemotherapy for 2 months                                                         | At night after 21:00       | 10 mg or 20mg oral MLT           | Placebo                   | QOL(FACT-L), Mucositis rate                                             | 88                  | 38             |
| Rasmussen <sup>33</sup>   | 2015 | Advanced cancer patients who reported significantly tired in palliative care unit | 64/65                                  | RCTs            | 7 days                                                                                             | Each night                 | 20 mg oral MLT                   | Placebo                   | Fatigue (MFI-20), QOL (EORTC QLQ-C15-PAL), Insomnia (EORTC QLQ-C15-PAL) | 21                  | 23             |
| Madsen <sup>34</sup>      | 2016 | Patients undergoing breast cancer surgery                                         | 51/59                                  | RCTs            | 2weeks: 3 days preoperatively until 2 weeks postoperatively                                        | One hour before bedtime    | 6 mg oral MLT                    | Placebo                   | Sleep (VAS, KSS), pain (VAS)                                            | 27                  | 21             |
| Kurdi <sup>28</sup>       | 2016 | Cancer Patients with Insomnia                                                     | 55.2/49.64                             | RCTs            | 14 days                                                                                            | At 7 pm                    | 3mg oral MLT                     | Placebo                   | Sleep (AIS)                                                             | 25                  | 25             |

|                                           |      |                                                                                        |             |      |                                                                          |                                                 |                                                                    |                                                            |                                                                               |     |     |    |    |    |    |    |    |    |    |    |    |    |    |    |    |    |    |    |    |    |    |    |    |    |    |    |    |    |    |    |    |    |    |    |
|-------------------------------------------|------|----------------------------------------------------------------------------------------|-------------|------|--------------------------------------------------------------------------|-------------------------------------------------|--------------------------------------------------------------------|------------------------------------------------------------|-------------------------------------------------------------------------------|-----|-----|----|----|----|----|----|----|----|----|----|----|----|----|----|----|----|----|----|----|----|----|----|----|----|----|----|----|----|----|----|----|----|----|----|
| 1                                         | 2    | 3                                                                                      | 4           | 5    | 6                                                                        | 7                                               | 8                                                                  | 9                                                          | 10                                                                            | 11  | 12  | 13 | 14 | 15 | 16 | 17 | 18 | 19 | 20 | 21 | 22 | 23 | 24 | 25 | 26 | 27 | 28 | 29 | 30 | 31 | 32 | 33 | 34 | 35 | 36 | 37 | 38 | 39 | 40 | 41 | 42 | 43 | 44 | 45 |
| Onseng <sup>35</sup>                      | 2017 | Patients with head and neck cancer receiving concurrent chemoradiation                 | 47.3/49.6   | RCTs | 35days: 5 days a week throughout the 7 weeks of chemoradiation           | At night after 21:00                            | 10 mL of a 0.2% MLT niosome oral gargle plus 20 mg oral dosage     | placebo                                                    | QOL (FACT—H&N), Mucositis rate, Mucositis severity (WHO-G)                    | 19  | 20  |    |    |    |    |    |    |    |    |    |    |    |    |    |    |    |    |    |    |    |    |    |    |    |    |    |    |    |    |    |    |    |    |    |
| Elsabagh H H <sup>25</sup>                | 2019 | Patients with head and neck cancer undergoing radiotherapy                             | 57.8/55.9   | RCTs | Six weeks                                                                | 30 minutes before sleeping                      | 20 mg oral MLT                                                     | Placebo                                                    | Stomatitis severity (WHO-G), Stomatitis rate, Pain (NRS)                      | 20  | 20  |    |    |    |    |    |    |    |    |    |    |    |    |    |    |    |    |    |    |    |    |    |    |    |    |    |    |    |    |    |    |    |    |    |
| Palmer <sup>36</sup>                      | 2019 | Patients with breast cancer receiving chemotherapy                                     | 54.24/54.11 | RCTs | 10 days during treatment.                                                | One hour before bedtime                         | 20 mg oral MLT                                                     | Placebo                                                    | Pain (NRS), Sleep (PSQI), Depression (BDI)                                    | 18  | 18  |    |    |    |    |    |    |    |    |    |    |    |    |    |    |    |    |    |    |    |    |    |    |    |    |    |    |    |    |    |    |    |    |    |
| Yennurajalingam <sup>4</sup> <sub>2</sub> | 2019 | Patients with advanced cancer with poor sleep quality                                  | Not clearly | RCTs | 14d                                                                      | At bedtime                                      | 20mg oral MLT plus bright white light therapy                      | Bright white light therapy alone                           | Sleep (PSQI), insomnia (ISI), fatigue (FACIT-F), depression (HADS), QOL(FACT) | 6   | 8   |    |    |    |    |    |    |    |    |    |    |    |    |    |    |    |    |    |    |    |    |    |    |    |    |    |    |    |    |    |    |    |    |    |
| Palmer <sup>37</sup>                      | 2020 | Patients with breast cancer undergoing chemotherapy after lumpectomy or mastectomy     | 54.24/54.11 | RCTs | 10 days: three days prior to chemotherapy and seven following days       | Approximately 1 hour before bedtime             | 20 mg oral MLT                                                     | Placebo                                                    | Depressive symptoms (BDI-II), Sleep quality (PSQI), QOL (EORTC QLQ-C30)       | 18  | 18  |    |    |    |    |    |    |    |    |    |    |    |    |    |    |    |    |    |    |    |    |    |    |    |    |    |    |    |    |    |    |    |    |    |
| Pashaki <sup>38</sup>                     | 2021 | Patients with breast cancer during adjuvant chemotherapy and radiotherapy              | 50.47/46.05 | RCTs | 8weeks: from 1 week before until 1 month after the adjuvant radiotherapy | Every night approximately 1 hour before bedtime | 18 mg oral MLT                                                     | Placebo                                                    | Fatigue (BFI)                                                                 | 38  | 36  |    |    |    |    |    |    |    |    |    |    |    |    |    |    |    |    |    |    |    |    |    |    |    |    |    |    |    |    |    |    |    |    |    |
| Seely <sup>39</sup>                       | 2021 | Cancer patients following lung cancer resection                                        | 67.2/67.2   | RCTs | One year after surgery                                                   | One hour before bedtime                         | 20 mg oral MLT                                                     | Placebo                                                    | Fatigue (MFI-20), QOL(QLQ-LC13), Sleep (MOS), Depression (BDI 2), Pain (BPI)  | 356 | 353 |    |    |    |    |    |    |    |    |    |    |    |    |    |    |    |    |    |    |    |    |    |    |    |    |    |    |    |    |    |    |    |    |    |
| Shahrokh <sup>40</sup>                    | 2021 | Patients with colorectal cancer undergoing chemotherapy with sleep disorder            | 63.63/64.11 | RCTs | 4week of treatment                                                       | At bedtime                                      | 6 mg oral MLT                                                      | 10 mg zolpidem                                             | Sleep (GSQS, PSQI), Depression (HRSD)                                         | 45  | 45  |    |    |    |    |    |    |    |    |    |    |    |    |    |    |    |    |    |    |    |    |    |    |    |    |    |    |    |    |    |    |    |    |    |
| Grutsch <sup>26</sup>                     | 2021 | NSCLC patients under chemotherapy                                                      | 60.3/63     | RCTs | From intervention to death                                               | At 8AM or at 8PM                                | 20 mg oral MLT                                                     | Placebo                                                    | QOL(QLQ-C30), Fatigue (QLQ-C30), Pain (QLQ-C30), Sleep (PSQI)                 | 20  | 18  |    |    |    |    |    |    |    |    |    |    |    |    |    |    |    |    |    |    |    |    |    |    |    |    |    |    |    |    |    |    |    |    |    |
| Borbalas <sup>32</sup>                    | 2021 | Patients with head and neck cancer undergoing radiation therapy and chemical treatment | 59/56       | RCTs | 5days lasting 7 weeks                                                    | Not clearly                                     | 3% oral MLT gel plus standard symptomatic treatment for stomatitis | Placebo plus standard symptomatic treatment for stomatitis | Stomatitis severity (WHO-G), Stomatitis rate                                  | 40  | 39  |    |    |    |    |    |    |    |    |    |    |    |    |    |    |    |    |    |    |    |    |    |    |    |    |    |    |    |    |    |    |    |    |    |

N, number; Randomized controlled trials, RCTs; Melatonin, MLT; BDI-II, Beck Depression Inventory; PSQI, Pittsburgh Sleep Quality Index; EORTC QLQ-C30, European Organization for Cancer Research and Treatment of Cancer Quality of Life Questionnaire; MFI-20, Multidimensional Fatigue Inventory; EORTC QLQ-C15-PAL, European Organization for Research and Treatment of Cancer Quality of Life Questionnaire Core 15 Palliative Version; CES-D, Center for Epidemiologic Studies-Depression; BFI: Brief Fatigue Inventory; VAS, Visual Analogue Scale; KSS, Karolinska Sleepiness Scale; MDI, Major Depression Inventory; FACT—H&N, Functional Assessment of Cancer Therapy—H&N Version 4; FACT-L, Functional Assessment of Cancer Therapy – Lung; QLQ-LC13, Lung Cancer-13 modules; BDI 2, Beck Depression Inventory 2; MOS, Medical Outcomes Study Sleep Survey; BPI, Brief Pain Inventory; GSQS, Sleep Quality Scale; HRSD, Hamilton Rating Scale for Depression; NRS, Numeric Rating Scales; ISI, Insomnia Severity Index; FACIT-F, Functional Assessment of Cancer Illness Therapy-Fatigue subscale; HADS, Hospital Anxiety and Depression Scale; FACT, Functional Assessment of Cancer Illness Therapy; AIS, Athens insomnia scale; WHO-G, WHO grading system

## Participants

Publication dates ranged from 1997 to 2021. Among the 19 studies included in systematic review, the mean age of the participants ranged from 46.05 to 67.2. The sample size ranged from 14 to 709

1  
2  
3 participants. Regarding treatment trajectory, 12 studies were conducted in cancer patients with  
4 adjuvant chemotherapy and (or) radiotherapy,<sup>25 26 29-32 35-38 40 41</sup> 1 was in advanced cancer patients  
5 with fatigue,<sup>33</sup> 1 was in breast cancer survivors,<sup>24</sup> 3 were in cancer patients with surgery,<sup>27 34 39</sup> and  
6  
7  
8 2 were in advanced cancer patients with poor sleep quality.<sup>28 42</sup> Regarding the cancer diagnose, 6  
9 studies were in breast cancer,<sup>24 27 34 36-38</sup> 2 were in non-small cell lung cancer,<sup>26 39</sup> 3 were in head  
10 and neck cancer,<sup>25 32 35</sup> 1 was in colorectal cancer,<sup>40</sup> and 7 studies were no restriction on cancer type  
11 but most in advanced cancer patients.<sup>28-31 33 41 42</sup>

### 12 13 14 15 **Intervention**

16  
17 The follow-up period ranged from seven days to one year. MLT dosage varied between 3 and 20  
18 mg. As for types of MLT administration, 17 were oral MLT,<sup>24-31 33 34 36-42</sup> 1 was MLT oral gargle,<sup>32</sup>  
19 and 1 was combined both.<sup>35</sup> Nearly all studies gave the MLT at night, except one compared both in  
20 morning and night<sup>26</sup>.

### 21 22 23 24 **Instruments**

25  
26 All studies used standardized and validated tools. QoL was measured by four validated tools:  
27 European Organization for Cancer Research (EORTC QLQ-C30),<sup>26 37</sup> Treatment validated for the  
28 Brazilian population (QLQ-BR 23),<sup>37</sup> Functional Assessment of Cancer Therapy (FACT),<sup>41 42</sup>  
29 Ferrans and Powers Quality of Life Index (QLI)<sup>26</sup>, European Organization for Research and  
30 Treatment of Cancer Quality of Life Questionnaire Core 15 Palliative Version (EORTC QLQ-C15-  
31 PAL),<sup>33</sup> Lung Cancer-13 (QLQ-LC13).<sup>39</sup> Sleep quality was measured by Pittsburgh Sleep Quality  
32 Index (PSQI),<sup>24 26 36 37 40 42</sup> Visual Analogue Scale (VAS),<sup>27 34</sup> Karolinska Sleepiness Scale (KSS),<sup>27</sup>  
33  
34 Sleep Quality Scale (GSQS),<sup>40</sup> Athens insomnia scale,<sup>28</sup> Medical Outcomes Study(MOS) Sleep  
35 Survey.<sup>39</sup> Depression was measured by Beck Depression Inventory (BDI-II),<sup>37 39</sup> Beck Depression  
36 Inventory (BDI),<sup>36</sup> Center for Epidemiologic Studies-Depression (CES-D),<sup>24</sup> Major Depression  
37 Inventory (MDI),<sup>27</sup> Hamilton Rating Scale for Depression (HRSD),<sup>40</sup> Hospital Anxiety and  
38 Depression Scale (HADS).<sup>42</sup> Fatigue was measured by Multidimensional Fatigue Inventory (MFI-  
39 20),<sup>33</sup> EORTC QLQ-C15-PAL (fatigue domain),<sup>33</sup> Brief Fatigue Inventory (BFI),<sup>38</sup> VAS,<sup>27</sup>  
40  
41 Multidimensional Fatigue Index 20 questionnaire,<sup>39</sup> QLQ-C30 (fatigue domain),<sup>26</sup> Functional  
42 Assessment of Cancer Illness Therapy-Fatigue subscale (FACIT-F).<sup>42</sup> Pain was measured by  
43 VAS,<sup>27 34</sup> Brief Pain Inventory (BPI),<sup>39</sup> QLQ-C30 (pain domain),<sup>26</sup> Numeric Rating Scales (NRS).<sup>25</sup>  
44  
45  
46  
47  
48  
49  
50  
51  
52  
53  
54  
55  
56  
57  
58  
59  
60  
<sup>36</sup> The incidence of stomatitis was calculated by the ratio of occurrences number and the total  
number.<sup>25 29-32 35 41</sup>

### 56 57 58 59 60 **Meta-analysis**



### Effect of MLT on QoL

Overall, 6 clinical trials evaluated the effect of MLT on QOL. The results showed that there was no statistically significant difference between the intervention and control groups [SMD = -0.01, 95% CI (-0.14, 0.11), P = 0.83] with no heterogeneity ( $I^2=0\%$ ,  $P=0.42$ ) (Fig. 4). All these 6 studies used 20mg MLT dosage. Subgroup analysis based on study duration ( $P=0.65-0.92$ ), treatment type( $P=0.45-0.6$ ) showed no significant differences.

### Effect of MLT on sleep quality

Nine clinical trials evaluated the effect of MLT on sleep quality. Pooled ES from random effect model showed a significant lowering effect on sleep quality [SMD = -0.78, 95% CI (-1.47, -0.10),  $P = 0.02$ ]. There was significant heterogeneity between studies ( $I^2 = 94\%$ ,  $P < 0.001$ ). We deleted a study<sup>40</sup> with obvious heterogeneity and  $I^2$  decreased to 79% [SMD = -0.35, 95% CI (-0.73, 0.03),  $P = 0.07$ ] (Fig. 5). Subgroup analysis based on dose, study duration, treatment, different combination of dosage and duration showed no significant differences between subgroups (Table 2).

**Table 2 Subgroup analyses of melatonin supplementation on sleep quality**

|                        | N | WMD (95% CI)         | Heterogeneity $I^2$ (P) | P within group |
|------------------------|---|----------------------|-------------------------|----------------|
| <b>Overall effect</b>  | 8 | -0.35 (-0.73, 0.03)  | 79% ( $P < 0.0001$ )    | 0.07           |
| <b>Dosage</b>          |   |                      |                         |                |
| <10mg                  | 4 | -0.32 (-0.88, 0.23)  | 77% ( $P=0.005$ )       | 0.25           |
| $\geq 10$ mg           | 4 | -0.42 (-1.16, 0.32)  | 84% ( $P=0.0004$ )      | 0.27           |
| <b>Duration</b>        |   |                      |                         |                |
| <2 weeks               | 2 | -0.01 (-0.33, 0.32)  | 0% ( $p=0.76$ )         | 0.96           |
| $\geq 2$ weeks         | 6 | -0.51 (-1.07, 0.05)  | 85% ( $p < 0.00001$ )   | 0.08           |
| <b>Combination</b>     |   |                      |                         |                |
| <10mg + $\geq 2$ weeks | 3 | -0.46 (-1.18, 0.27)  | 83% ( $P=0.003$ )       | 0.22           |
| >10mg + $\geq 2$ weeks | 3 | -0.01 (-0.16, 0.13)  | 0% ( $P=1.00$ )         | 0.86           |
| >10mg + <2 weeks       | 1 | -1.75 (-2.54, -0.97) | -                       | <0.01          |



|                           |   |                     |                |      |
|---------------------------|---|---------------------|----------------|------|
| <10mg + <2 weeks          | 1 | 0.06 (-0.5, 0.62)   | -              | 0.83 |
| <b>Combined treatment</b> |   |                     |                |      |
| <b>Under chemotherapy</b> | 2 | -0.87 (-2.57, 0.82) | 91% (P=0.0009) | 0.31 |
| <b>Under surgery</b>      | 3 | -0.02 (-0.15, 0.12) | 0% (P=0.89)    | 0.83 |
| <b>With insomnia</b>      |   |                     |                |      |
| <b>Yes</b>                | 2 | -0.7 (-1.96, 0.57)  | 77% (P=0.04)   | 0.28 |
| <b>No</b>                 | 6 | -0.23 (-0.58, 0.13) | 73% (P=0.002)  | 0.21 |

N, number of the literatures

### Effect of MLT on fatigue

The overall ES of MLT for fatigue alleviation was medium [SMD = -0.34, 95% CI (-0.73, 0.06), P = 0.10] with high heterogeneity among studies (P = 0.002, I<sup>2</sup> = 74%), and there was no significant statistic difference. The study of Pashaki et al<sup>38</sup> showed a great heterogeneity for only this one proved a significant lower levels of fatigue in intervention group. We removed it and the heterogeneity decreased to 0 (Fig. 6).

### Effect of MLT on depression

Six clinical trials evaluated the effect of MLT on depression. Only Palmer et al showed the significant effect on depression.<sup>37</sup> The overall treatment effect on depression showed there was no statistically significant difference between the intervention and control groups [SMD = -0.24, 95% CI (-0.53, 0.05), P = 0.10] with high heterogeneity among studies (P = 0.03, I<sup>2</sup> = 60%). A sensitivity analysis was done by removing one study from the analysis (Fig. 7).<sup>37</sup> Regarding subgroup analysis, a significant difference was observed on the study duration and treatment, though both showed a slight ES. Patients who received intervention duration greater than 14 days had a significant lower depression [SMD = -0.14, 95% CI (-0.27, -0.01), P = 0.03] with low heterogeneity (P = 0.4, I<sup>2</sup> = 0%). Meanwhile, MLT seemed to alleviate depression in cancer patients who underwent operation [SMD = -0.17, 95% CI (-0.32, -0.03), P = 0.02] with low heterogeneity (P = 0.35, I<sup>2</sup> = 0%), compared to those received chemotherapy. No significant difference was observed among studies on the dosage (P = 0.27-0.43), cancer diagnose (P = 0.20), and combined chemotherapy (P = 0.13-0.42).

### Effect of MLT on pain

Five clinical trials evaluated the effect of MLT on pain [SMD = -0.34, 95% CI (-0.7, 0.02), P = 0.06] with high heterogeneity among studies (P = 0.03, I<sup>2</sup> = 62%). No significant difference was observed among studies on the cancer diagnose (P=0.27-0.47), combined treatment (P=0.37), duration (P=0.11) and dosage (P=0.16-0.27). Sensitivity analysis was done by removing one study<sup>25</sup> and the heterogeneity decreased to 0% (Fig. 8).

### Effect of MLT on stomatitis

As for stomatitis, seven clinical trials evaluated the effect of MLT on the incidence of stomatitis showed moderate ES [OR = 0.59, 95% CI (0.31, 1.13), P = 0.11] (Fig. 9) with high heterogeneity (P = 0.01, I<sup>2</sup> = 64%). All of the study duration were more than 2 weeks and patients all accepted chemotherapy or radiotherapy. Besides, nearly all these clinical trials gave the MLT of 20 mg, except one used 3% MLT oral gel.<sup>32</sup> However, removing it or not caused little change to heterogeneity and ES. Further subgroup analysis showed that the cancer type might be the main heterogeneity sources. MLT could not reduce the incidence of stomatitis among patients with head and neck cancer under adjuvant chemotherapy or radiotherapy [OR = 1.15, 95% CI (0.56, 2.4), P = 0.7], with low heterogeneity (P = 0.5, I<sup>2</sup> = 0%). However, it had slight significant value in patients with metastatic solid tumor [OR = 0.28, 95% CI (0.17, 0.44), P < 0.0001] with low heterogeneity (P = 0.74, I<sup>2</sup> = 0%).

As for stomatitis severity, three clinical trials evaluated the effect of MLT on reducing 3-4 grades (severe) stomatitis according to WHO grade system.<sup>43</sup> The overall treatment effect showed that the intervention has no statistically significant difference between the intervention and control groups [OR = 0.59, 95% CI (0.26, 1.36), P = 0.22] with low heterogeneity (P = 0.28, I<sup>2</sup> = 22%) (Fig.10).

### Discussion

To the best of our knowledge, this study is the first meta-analysis that investigated the effect of MLT on the QoL, sleep quality, and other symptoms like fatigue, depression, pain and stomatitis in cancer patients. Unfortunately, in the current study, we did not prove the beneficial effect of MLT on QoL, sleep quality, fatigue and pain. However, it had potential ability to improve depression and reduce the incidence of stomatitis with small ES.

1  
2  
3  
4  
5  
6  
7  
8  
9  
10  
11  
12  
13  
14  
15  
16  
17  
18  
19  
20  
21  
22  
23  
24  
25  
26  
27  
28  
29  
30  
31  
32  
33  
34  
35  
36  
37  
38  
39  
40  
41  
42  
43  
44  
45  
46  
47  
48  
49  
50  
51  
52  
53  
54  
55  
56  
57  
58  
59  
60

Most of the suffering that cancer patients now facing comes from disturbing symptoms like poor sleep, fatigue, depression, pain and so on. Effective symptoms controlling greatly improves QoL. Thus, the effect of MLT on QoL might be achieved through relieving symptom. Innominato et al revealed bedtime MLT was associated with a significant improvement in sleep quality, fatigue severity, QoL, social and cognitive function in advanced breast cancer patients.<sup>44</sup> However, contradictory conclusion revealed that MLT did not improve appetite, weight, or QoL in cachectic patients with advanced cancer.<sup>45</sup> Besides, a previous study reported beneficial short-term effects of MLT on sleep but not QoL.<sup>46</sup> Our review included six trails regarded QoL of cancer patients as health outcome. None of them proved a significant improvement in QoL in intervention group, though Grutsch et al<sup>26</sup> and Sookprasert et al<sup>41</sup> provided a trend for better QoL compared with baseline. However, the conclusion could not be the convincing evidence to support the certain effectiveness of MLT on QoL, for both them lasted a long duration and various potential confounding factors existed. For such invalid effectiveness, one of the possible interpretations might be the differences due to study population, interventions and measurements. Another explanation might be the multi-dimensional properties of QoL, which not only contained physical domain but covered the domains of psychology, spirit, and social. Thus, mere elimination of symptoms like sleep or fatigue through drug seems to be difficult to effectively improve the QoL, especially for cancer patients who were faced with a mass of disturbing from many other aspects.

Due to the important role in regulating the circadian rhythm and sleep, many studies have been conducted to verify the value of MLT on sleep. MLT may be preferable to traditional hypnotics in management of insomnia.<sup>47</sup> A network meta-analysis support effectiveness of MLT in improving sleep-onset difficulties.<sup>48</sup> A review about the influence of dietary sources of MLT on sleep quality indicated that the sources of MLT consumption of milk and sour cherries may improve sleep quality.<sup>49</sup> There are many conflicting studies, no matter in population, dosage and duration. Fatemeh et al found the significant effects of MLT on sleep quality in patients with respiratory diseases, metabolic disorders, and sleep disorders, but not in mental disorders, neurodegenerative diseases and breast cancer.<sup>50</sup> Under the condition of using the Pittsburgh sleep quality index as unified measurement tool, 20mg MLT for 10 days in breast cancer patients under chemotherapy showed a positive sleeping improving,<sup>37</sup> while same dosage for at least 28 days revealed a meaningless result in patients with lung cancer.<sup>51</sup> Meanwhile, it remains unknown the optimal combination of dosage and duration. Innominato et al found 5mg for two months has a positive effectiveness on sleep quality and QoL in advanced breast cancer patients.<sup>44</sup> Similarly, in advanced cancer patients, combination of 14-day 20 mg MLT plus bright white light therapy did not improve the sleep quality.<sup>42</sup> Under fewer doses, 14-day 3mg MLT actually improved the sleep in cancer patients with insomnia.<sup>28</sup> Our review revealed MLT could improve the sleep with large heterogeneity. The subgroup analysis did not find the significant difference in different MLT duration, dosage, as well as combination of dosage and duration. The finding indicated the optimal combination of dosage

1  
2  
3 and duration in improving sleep for patients with cancer worthy of further exploration. The  
4 administration type is another point. It was found 2 mg prolonged release MLT formulation for 14  
5 days results in significant and clinically meaningful improvements in sleep quality, morning  
6 alertness, sleep onset latency and quality of life in primary insomnia patients<sup>52</sup> and in Parkinson's  
7 disease patients with a poor sleep quality.<sup>53</sup> However, most of the researches were the oral MLT.  
8 How the administration type effect the effect on sleep in cancer patients remains to be studied. The  
9 effectiveness of the combination of bright light and MLT remains controversial. Yennurajalingam  
10 et al proved it could not work in advanced cancer patients with insomnia,<sup>42</sup> while it could improve  
11 subjective daytime sleepiness in patients with delayed sleep phase disorder.<sup>54</sup>  
12  
13  
14  
15  
16

17  
18 MLT may be an effective treatment for patients with chronic fatigue syndrome.<sup>55</sup> Nevertheless,  
19 in the current study, none of the study was showed to improve fatigue in cancer patients. Only a  
20 high quality trail proved a significant effect of melatonin on breast cancer patients undergoing  
21 adjuvant chemotherapy and radiotherapy,<sup>38</sup> with melatonin 18 mg a day from 1 week before until 1  
22 month after the adjuvant radiotherapy. The evidence supporting the usage of melatonin for cancer-  
23 related fatigue is limited. Short-term use of dexamethasone or methylprednisolone is recommended  
24 for the control of cancer-related fatigue (CRF) in metastatic cancer patients according to European  
25 Society for Medical Oncology (ESMO) guideline,<sup>56</sup> while the use of eszopiclone, megestrol acetate  
26 and MLT is not recommended for the control of CRF. However, the preventive effect of MLT on  
27 cancer-related fatigue is still under study. Non-pharmaceutical interventions were also  
28 recommended,<sup>56</sup> like relaxation exercise, massage, cognitive-behavioural therapy, physical activity  
29 and so on were demonstrated to have moderate-to-large effect size.<sup>57</sup> Multimodal therapy, qigong,  
30 aerobic exercise, and cognitive-behavioural therapy might be the best chose for cancer-related  
31 fatigue.<sup>58</sup>  
32  
33  
34  
35  
36  
37  
38

39  
40 MLT seems to be able to ease the pain, however, the results varied in different researches. Lee  
41 et al found the prophylactic administration of MLT confers significant clinical benefits in reducing  
42 postoperative pain and opioid use, as well as improved sensory recovery following orthognathic  
43 surgery.<sup>59</sup> Tunay et al found preoperative oral MLT led to a reduction in pain scores, total morphine  
44 consumption and supplemental analgesic requirement after surgery.<sup>60</sup> MLT could also improve pain  
45 in females with primary dysmenorrhea.<sup>61</sup> However, the evidence was limited in critically ill patients  
46 at ICU and patients after total knee arthroplasty.<sup>62 63</sup> As for cancer patients, the evidence is also  
47 restricted. Our review revealed MLT had no effect on pain relief. Only Elsabagh et al found the  
48 beneficial effect of MLT on alleviating pain in head and neck cancer patients undergoing  
49 radiotherapy, with dosage of 20 mg for six weeks.<sup>25</sup> At the same time, Palme et al found a drops of  
50 pain scores from baseline in intervention group.<sup>36</sup> The minor role of MLT on pain in cancer patients  
51 could be explained by the cancer-related pain is one of the most common and troublesome  
52 symptoms affecting cancer patients with high severity.<sup>64</sup> For such kind sever pain, effective  
53  
54  
55  
56  
57  
58  
59  
60

1  
2  
3 analgesic like opioid is more helpful. In addition, despite the availability of effective treatments,  
4 cancer-related pain may be inadequately controlled in up to 50% of patients. Thus, the  
5 multidisciplinary interventions are required<sup>65</sup> and the single MLT seems too weak for cancer pain.  
6  
7

8  
9 Circadian rhythm disruption underlies the pathophysiology of psychiatric disorders, especially  
10 depression.<sup>6</sup> MLT as a pleiotropic regulator molecule and its analogues have been observed to  
11 resynchronize the circadian rhythm and to alleviate depressive symptoms.<sup>66</sup> However, duration and  
12 treatment might affect the antidepressant effects of MLT, both showed a slight ES. We found MLT  
13 supplementation played significant effect in patients who received more than 14 days administration  
14 and those who underwent operation. Our assumption is that patients under operation means they  
15 tend to be in the early stages of the disease with lighter disease load and slight depression.  
16 Antidepressant effect of long MLT duration in patients with not so serious disease were showed in  
17 some studies. For example, MLT for 12 weeks had beneficial effects on decreasing depression in  
18 women with polycystic ovary syndrome,<sup>67</sup> patients with Parkinson's disease<sup>68</sup> and diabetic  
19 hemodialysis patients.<sup>69</sup> Nevertheless, it had no prophylactic antidepressant effect on acute coronary  
20 syndrome<sup>70</sup> and patients with acute mania.<sup>71</sup>  
21  
22  
23  
24  
25  
26

27  
28 Oral mucositis refers to inflammation and ulceration of the oral mucosa, which is a frequent  
29 side-effect of cancer therapy.<sup>72</sup> Stomatitis especially the grade 3 or 4 mucositis<sup>73</sup> can hamper oral  
30 nutrition, resulting in malnutrition, reduce QoL and introduce the need for dose reductions and  
31 interruption of chemotherapy.<sup>74</sup> Melatonin has the potential direct antitumor activity, which was  
32 proved to modulate the effects of cancer chemotherapy, by enhancing its therapeutic efficacy and  
33 reducing its toxicity.<sup>75</sup> Our review showed MLT played no effect on mucositis. Further subgroup  
34 analysis showed the cancer type was the major source of heterogeneity. MLT couldn't reduce the  
35 stomatitis rate among head and neck cancer patients, while had slight significant effect in patients  
36 with metastatic solid tumor. Among the studies conducted in head and neck cancer patients,  
37 Borbala et al found that oral MLT gel caused a consistent trend to lower incidence and shorter  
38 mucositis duration.<sup>32</sup> Onseong et al revealed that adjuvant MLT delayed the onset of oral mucositis.<sup>35</sup>  
39 Elsabagh et al found the MLT reduced severe oral mucositis development.<sup>25</sup> None of them proved  
40 the MLT on reducing the incidence of stomatitis. The possible interpretation was the significant  
41 toxicity of systemic high doses of chemotherapy or radiotherapy for head and neck cancer.<sup>76</sup>  
42 Compared to other cancer patients who only received chemotherapy or radiotherapy, most head and  
43 neck cancer patients received the combined chemoradiotherapy. In addition, radiation in head and  
44 neck adds the odds of stomatitis occurrence. We also found in MLT group, the reported incidence  
45 of stomatitis was higher in head and neck cancer patients (52.5%-90%) than other cancer population  
46 (5.12%-24%). Moreover, our review revealed that MLT could not reduce the severity of stomatitis.  
47 A meta-analysis showed that probiotics might reduce the incidence and mitigate the severity of  
48 cancer therapy-induced mucositis.<sup>77</sup> Also, photobiomodulation (PBM) was recommended for the  
49  
50  
51  
52  
53  
54  
55  
56  
57  
58  
59  
60

1  
2  
3 prevention of mucositis.<sup>78 79</sup> However, how the effect of them for patients with head and neck cancer  
4 under chemoradiotherapy are still unknown.  
5  
6  
7  
8

### 9 **Strengths and limitations**

10  
11 This systematic review was registered a priori and conducted in line with Preferred Reporting Items  
12 for Systematic Reviews and Meta-Analysis and the recommendations of the Cochrane Collaboration.  
13  
14

15  
16 Eleven databases were widely searched for eligible studies. Risk of bias analysis was conducted  
17 independently by two reviewers using the validated Cochrane assessment tool. Trials quality were  
18 generally in moderate level with most studies were in low risk of bias, which could further lend  
19 confidence to the current pooled results. In subgroup analysis, we also widely explored the  
20 effectiveness of MLT in different population, treatment, dosage, duration, administration time.  
21 There are some limitations. First is the insufficient literature. We reviewed many aspects of MLT,  
22 like QoL, sleep, fatigue, depression, pain and stomatitis. Though the total of 19 articles were  
23 included in the final meta-analysis. However, for every dimension the literatures are limited, from  
24 only 5-9. It is mostly resulted by the lacked RCTs of MLT on cancer patients, insufficient data used  
25 for synthesis and 14 excluded articles without full text, which limits the generality of the conclusion.  
26 Meanwhile, the assessment of publication bias is not allowed for no dimension has more than 10  
27 references. Furthermore, the main significant results were from subgroup analysis of the limited  
28 studies. Thus, the results should be interpreted prudently.  
29  
30  
31  
32  
33  
34  
35  
36  
37  
38

### 39 **Conclusion**

40 Due to the nontoxic property and beneficial effects,<sup>80 81</sup> MLT is more and more used as adjuvant  
41 medicine in anticancer treatment. As far as we known, this study is the first meta-analysis that  
42 investigated the effect of MLT on QoL and symptoms in cancer patients. We included the moderate  
43 number of trials with varied populations and examined the effectiveness of MLT on cancer patients  
44 to provide evidence-based evidence in using MLT in real clinical setting. Our review showed that  
45 MLT couldn't improve the QoL, fatigue, and pain among cancer patients. It is partly due to the  
46 limited literatures. Besides, compared with other patients, cancer patients might have more severe  
47 symptoms and psychological suffering caused by disease and its treatment. Thus, MLT play a  
48 limited role in cancer population. MLT has positive effects on decreasing the stomatitis incidence  
49 and depression, which may make it a reasonable option to use for stomatitis and depression prevention  
50 in clinical. However, due to the large heterogeneity, we still could not verify therapeutic effects of  
51 MLT on sleep quality. Further large-scale RCTs are urgently required. Besides, the effect of  
52  
53  
54  
55  
56  
57  
58  
59  
60

1  
2  
3 different combination of MLT dosage and duration, administration type and joint measures are  
4 worthy of further study.  
5  
6  
7  
8

### 9 **Supplementary Material**

10 Fig.1 Study flow diagram

11  
12 Fig.2 The overall risk of bias

13  
14 Fig.3 The individual risk of bias for each study

15  
16 Fig.4 Forest plot of random effects model of the effect of MLT on QoL of cancer patients

17  
18 Fig.5 Forest plot of random effects model of the effect of MLT on sleep quality of cancer patients

19  
20 Fig.6 Forest plot of random effects model of the effect of MLT on fatigue of cancer patients

21  
22 Fig.7 Forest plot of random effects model of the effect of MLT on depression of cancer patients

23  
24 Fig.8 Forest plot of random effects model of the effect of MLT on pain of cancer patients

25  
26 Fig.9 Forest plot of random effects model of the effect of MLT on stomatitis rate of cancer patients

27  
28 Fig.10 Forest plot of random effects model of the effect of MLT on stomatitis severity of cancer  
29 patients  
30  
31  
32  
33  
34  
35  
36  
37  
38

### 39 **Footnotes**

40  
41 **Funding:** The authors have not declared a specific grant for this research from any funding agency in  
42 the public, commercial or not-for-profit sectors.  
43  
44  
45  
46  
47  
48  
49  
50  
51

52 **Conflicts of interest:** All the authors have declared that no competing interest exists.  
53  
54  
55  
56

57 **Provenance and peer review:** Not commissioned; externally peer reviewed.  
58  
59  
60

**Supplemental material:** This content has been supplied by the author(s). It has not been vetted by BMJ  
Publishing Group Limited (BMJ) and may not have been peer-reviewed. Any opinions or



1  
2  
3 recommendations discussed are solely those of the author(s) and are not endorsed by BMJ. BMJ  
4 disclaims all liability and responsibility arising from any reliance placed on the content. Where the  
5 content includes any translated material, BMJ does not warrant the accuracy and reliability of the  
6 translations (including but not limited to local regulations, clinical guidelines, terminology, drug names  
7 and drug dosages), and is not responsible for any error and/or omissions arising from translation and  
8 adaptation or otherwise.  
9  
10  
11  
12  
13  
14

15  
16 **Data availability statement:**

17  
18 All data relevant to the study are included in the article or uploaded as supplementary information. No  
19 additional data are available.  
20  
21  
22  
23

24 **Authors' contributions:**

25  
26 All authors had contributed to this study. Xuying Li and Rongrong Fan conceived and designed the  
27 original study protocol. Rongrong Fan and Xiaofan Bu performed literature search and and literature  
28 screening. Siyu Yang and Tongyu Wang takes responsibility for the integrity of the data and the data  
29 analysis. Xuying Li interpreted the results. Yan Tan and Hongyun Chen assessed the risk of bias of the  
30 studies. Rongrong Fan was responsible for writing the first draft of the paper and revision of the  
31 manuscript. Xuying Li is responsible for the overall content as guarantor. All authors ccritically reviewed  
32 and approved the final manuscript.  
33  
34  
35  
36  
37  
38  
39

40 **Ethics approval:**

41  
42 This is a meta-analysis. The Hunan Cancer Hospital Research Ethics Committee has confirmed that no  
43 ethical approval is required.  
44  
45  
46  
47  
48

49 **Patient consent for publication:**

50  
51 Not applicable.  
52  
53  
54

55 **References**

56  
57 1. Stacchiotti A, Favero G, Rodella LF. Impact of Melatonin on Skeletal Muscle and Exercise. *Cells*  
58  
59  
60



- 2020;9(2) doi: 10.3390/cells9020288 [published Online First: 2020/01/30]
2. Mortezaee K, Majidpoor J, Daneshi E, et al. Post-treatment of melatonin with CCl(4) better reduces fibrogenic and oxidative changes in liver than melatonin co-treatment. *Journal of cellular biochemistry* 2018;119(2):1716-25. doi: 10.1002/jcb.26331 [published Online First: 2017/08/08]
  3. Mortezaee K, Pasbakhsh P, Ragerdi Kashani I, et al. Melatonin Pretreatment Enhances the Homing of Bone Marrow-derived Mesenchymal Stem Cells Following Transplantation in a Rat Model of Liver Fibrosis. *Iranian biomedical journal* 2016;20(4):207-16. doi: 10.7508/ibj.2016.04.004 [published Online First: 2016/05/01]
  4. Mortezaee K, Khanlarkhani N, Sabbaghziarani F, et al. Preconditioning with melatonin improves therapeutic outcomes of bone marrow-derived mesenchymal stem cells in targeting liver fibrosis induced by CCl4. *Cell and tissue research* 2017;369(2):303-12. doi: 10.1007/s00441-017-2604-1 [published Online First: 2017/04/18]
  5. Xie Z, Chen F, Li WA, et al. A review of sleep disorders and melatonin. *Neurological research* 2017;39(6):559-65. doi: 10.1080/01616412.2017.1315864 [published Online First: 2017/05/04]
  6. Satyanarayanan SK, Su H, Lin YW, et al. Circadian Rhythm and Melatonin in the Treatment of Depression. *Current pharmaceutical design* 2018;24(22):2549-55. doi: 10.2174/1381612824666180803112304 [published Online First: 2018/08/04]
  7. Maria S, Swanson MH, Enderby LT, et al. Melatonin-micronutrients Osteopenia Treatment Study (MOTS): a translational study assessing melatonin, strontium (citrate), vitamin D3 and vitamin K2 (MK7) on bone density, bone marker turnover and health related quality of life in postmenopausal osteopenic women following a one-year double-blind RCT and on osteoblast-osteoclast co-cultures. *Aging* 2017;9(1):256-85. doi: 10.18632/aging.101158 [published Online First: 2017/01/29]
  8. Maria S, Samsonraj RM, Munmun F, et al. Biological effects of melatonin on osteoblast/osteoclast cocultures, bone, and quality of life: Implications of a role for MT2 melatonin receptors, MEK1/2, and MEK5 in melatonin-mediated osteoblastogenesis. *Journal of pineal research* 2018;64(3) doi: 10.1111/jpi.12465 [published Online First: 2017/12/30]
  9. Bhattacharya S, Patel KK, Dehari D, et al. Melatonin and its ubiquitous anticancer effects. *Molecular and cellular biochemistry* 2019;462(1-2):133-55. doi: 10.1007/s11010-019-03617-5 [published Online First: 2019/08/28]

- 1  
2  
3  
4 10. Veiga ECA, Simões R, Valenti VE, et al. Repercussions of melatonin on the risk of breast cancer: a  
5 systematic review and meta-analysis. *Revista da Associação Médica Brasileira (1992)*  
6 2019;65(5):699-705. doi: 10.1590/1806-9282.65.5.699 [published Online First: 2019/06/06]  
7  
8  
9 11. Reiter RJ, Rosales-Corral SA, Tan DX, et al. Melatonin, a Full Service Anti-Cancer Agent: Inhibition of  
10 Initiation, Progression and Metastasis. *International journal of molecular sciences* 2017;18(4)  
11 doi: 10.3390/ijms18040843 [published Online First: 2017/04/20]  
12  
13  
14 12. Wu C, Li M, Meng H, et al. Analysis of status and countermeasures of cancer incidence and mortality  
15 in China. *Science China Life sciences* 2019;62(5):640-47. doi: 10.1007/s11427-018-9461-5  
16 [published Online First: 2019/03/23]  
17  
18  
19 13. Ginzac A, Dubois S, Hager MO, et al. Quality of life for older patients with cancer: a review of the  
20 evidence supporting melatonin use. *Aging clinical and experimental research*  
21 2020;32(12):2459-68. doi: 10.1007/s40520-020-01532-0 [published Online First: 2020/04/03]  
22  
23  
24 14. Posadzki PP, Bajpai R, Kyaw BM, et al. Melatonin and health: an umbrella review of health outcomes  
25 and biological mechanisms of action. *BMC medicine* 2018;16(1):18. doi: 10.1186/s12916-017-  
26 1000-8 [published Online First: 2018/02/06]  
27  
28  
29 15. Seely D, Wu P, Fritz H, et al. Melatonin as adjuvant cancer care with and without chemotherapy: a  
30 systematic review and meta-analysis of randomized trials. *Integrative cancer therapies*  
31 2012;11(4):293-303. doi: 10.1177/1534735411425484 [published Online First: 2011/10/25]  
32  
33  
34 16. Palmer ACS, Zortea M, Souza A, et al. Clinical impact of melatonin on breast cancer patients  
35 undergoing chemotherapy; effects on cognition, sleep and depressive symptoms: A  
36 randomized, double-blind, placebo-controlled trial. *PloS one* 2020;15(4):e0231379. doi:  
37 10.1371/journal.pone.0231379 [published Online First: 2020/04/18]  
38  
39  
40 17. Sedighi Pashaki A, Mohammadian K, Afshar S, et al. A Randomized, Controlled, Parallel-Group, Trial  
41 on the Effects of Melatonin on Fatigue Associated with Breast Cancer and Its Adjuvant  
42 Treatments. *Integrative cancer therapies* 2021;20:1534735420988343. doi:  
43 10.1177/1534735420988343 [published Online First: 2021/02/06]  
44  
45  
46 18. Semiglazova TY, Osipov M, Krivorotko P, et al. Melatonin and metformin in neoadjuvant  
47 chemotherapy in locally advanced breast cancer. *Annals of Oncology* 2019;30:v100. doi:  
48 10.1093/annonc/mdz241.003  
49  
50  
51 19. Lissoni P, Mandala M, Brivio F. Abrogation of the negative influence of opioids on IL-2  
52 immunotherapy of renal cell cancer by melatonin. *European urology* 2000;38(1):115-8. doi:  
53 10.1159/000020263  
54  
55  
56  
57  
58  
59  
60

- 1  
2  
3  
4  
5  
6  
7  
8  
9  
10  
11  
12  
13  
14  
15  
16  
17  
18  
19  
20  
21  
22  
23  
24  
25  
26  
27  
28  
29  
30  
31  
32  
33  
34  
35  
36  
37  
38  
39  
40  
41  
42  
43  
44  
45  
46  
47  
48  
49  
50  
51  
52  
53  
54  
55  
56  
57  
58  
59  
60
20. Farshchian N, Shirzadi M, Farshchian F, et al. Evaluation of the melatonin effect on sleep quality in cancer patients. *Tehran University Medical Journal* 2020;78(1):38-42.
21. McGrath S, Zhao X, Steele R, et al. Estimating the sample mean and standard deviation from commonly reported quantiles in meta-analysis. *Statistical methods in medical research* 2020:962280219889080. doi: 10.1177/0962280219889080 [published Online First: 2020/04/16]
22. Sedighi Pashaki A, Afshar S, Mohamadian K, et al. Effects of melatonin on IL-6 serum level changes and fatigue caused by adjuvant chemoradiotherapy in breast cancer women: A randomized controlled Trial. *Iranian Journal of Breast Diseases* 2021;13(4):23-32. doi: 10.30699/IJBD.13.4.23
23. Innominato PF, Lim AS, Palesh O, et al. The effect of melatonin on sleep and quality of life in patients with advanced breast cancer. *Supportive care in cancer : official journal of the Multinational Association of Supportive Care in Cancer* 2016;24(3):1097-105. doi: 10.1007/s00520-015-2883-6
24. Chen WY, Giobbie-Hurder A, Gantman K, et al. A randomized, placebo-controlled trial of melatonin on breast cancer survivors: impact on sleep, mood, and hot flashes. *Breast cancer research and treatment* 2014;145(2):381-8. doi: 10.1007/s10549-014-2944-4 [published Online First: 2014/04/11]
25. Elsabagh HH, Moussa E, Mahmoud SA, et al. Efficacy of Melatonin in prevention of radiation-induced oral mucositis: A randomized clinical trial. *Oral diseases* 2020;26(3):566-72. doi: 10.1111/odi.13265 [published Online First: 2019/12/24]
26. Grutsch J, Hrushesky W, Lis C, et al. Daily evening melatonin prolongs survival among patients with advanced non-small-cell lung cancer. *Biological Rhythm Research* 2021 doi: 10.1080/09291016.2021.1899485
27. Hansen MV, Andersen LT, Madsen MT, et al. Effect of melatonin on depressive symptoms and anxiety in patients undergoing breast cancer surgery: a randomized, double-blind, placebo-controlled trial. *Breast cancer research and treatment* 2014;145(3):683-95. doi: 10.1007/s10549-014-2962-2
28. Kurdi MS, Muthukalai SP. The Efficacy of Oral Melatonin in Improving Sleep in Cancer Patients with Insomnia: A Randomized Double-Blind Placebo-Controlled Study. *Indian journal of palliative care* 2016;22(3):295-300. doi: 10.4103/0973-1075.185039
29. Lissoni P. Is there a role for melatonin in supportive care? *Supportive care in cancer : official journal*

- 1  
2  
3  
4  
5  
6  
7  
8  
9  
10  
11  
12  
13  
14  
15  
16  
17  
18  
19  
20  
21  
22  
23  
24  
25  
26  
27  
28  
29  
30  
31  
32  
33  
34  
35  
36  
37  
38  
39  
40  
41  
42  
43  
44  
45  
46  
47  
48  
49  
50  
51  
52  
53  
54  
55  
56  
57  
58  
59  
60
- of the *Multinational Association of Supportive Care in Cancer* 2002;10(2):110-6. doi: 10.1007/s005200100281
30. Lissoni P, Barni S, Mandala M, et al. Decreased toxicity and increased efficacy of cancer chemotherapy using the pineal hormone melatonin in metastatic solid tumour patients with poor clinical status. *European journal of cancer (Oxford, England : 1990)* 1999;35(12):1688-92. doi: 10.1016/s0959-8049(99)00159-8
31. Lissoni P, Tancini G, Barni S, et al. Treatment of cancer chemotherapy-induced toxicity with the pineal hormone melatonin. *Supportive care in cancer : official journal of the Multinational Association of Supportive Care in Cancer* 1997;5(2):126-9. doi: 10.1007/bf01262569
32. Lozano A, Marruecos J, Rubió J, et al. Randomized placebo-controlled phase II trial of high-dose melatonin mucoadhesive oral gel for the prevention and treatment of oral mucositis in patients with head and neck cancer undergoing radiation therapy concurrent with systemic treatment. *Clinical and Translational Oncology* 2021;23(9):1801-10. doi: 10.1007/s12094-021-02586-w
33. Lund Rasmussen C, Klee Olsen M, Thit Johnsen A, et al. Effects of melatonin on physical fatigue and other symptoms in patients with advanced cancer receiving palliative care: A double-blind placebo-controlled crossover trial. *Cancer* 2015;121(20):3727-36. doi: 10.1002/cncr.29563
34. Madsen MT, Hansen MV, Andersen LT, et al. Effect of Melatonin on Sleep in the Perioperative Period after Breast Cancer Surgery: A Randomized, Double-Blind, Placebo-Controlled Trial. *Journal of Clinical Sleep Medicine* 2016;12(2):225-33. doi: 10.5664/jcsm.5490
35. Onseong K, Johns NP, Khuayjarernpanishk T, et al. Beneficial Effects of Adjuvant Melatonin in Minimizing Oral Mucositis Complications in Head and Neck Cancer Patients Receiving Concurrent Chemoradiation. *Journal of alternative and complementary medicine (New York, NY)* 2017;23(12):957-63. doi: 10.1089/acm.2017.0081 [published Online First: 2017/06/29]
36. Palmer ACS, Souza A, Dos Santos VS, et al. The Effects of Melatonin on the Descending Pain Inhibitory System and Neural Plasticity Markers in Breast Cancer Patients Receiving Chemotherapy: Randomized, Double-Blinded, Placebo-Controlled Trial. *Frontiers in pharmacology* 2019;10:1382. doi: 10.3389/fphar.2019.01382
37. Palmer ACS, Zortea M, Souza A, et al. Clinical impact of melatonin on breast cancer patients undergoing chemotherapy; effects on cognition, sleep and depressive symptoms: A randomized, double-blind, placebo-controlled trial. *PLoS one* 2020;15(4):e0231379. doi: 10.1371/journal.pone.0231379

- 1  
2  
3  
4 38. Pashaki AS, Mohammadian K, Afshar S, et al. A Randomized, Controlled, Parallel-Group, Trial on the  
5 Effects of Melatonin on Fatigue Associated with Breast Cancer and Its Adjuvant Treatments.  
6 *Integrative cancer therapies* 2021;20 doi: 10.1177/1534735420988343  
7
- 8  
9 39. Seely D, Legacy M, Auer RC, et al. Adjuvant melatonin for the prevention of recurrence and mortality  
10 following lung cancer resection (AMPLCaRe): A randomized placebo controlled clinical trial.  
11 *EClinicalMedicine* 2021;33:100763. doi: 10.1016/j.eclinm.2021.100763  
12
- 13  
14 40. Shahrokhi M, Ghaeli P, Arya P, et al. Comparing the Effects of Melatonin and Zolpidem on Sleep  
15 Quality, Depression, and Anxiety in PatientsWithColorectalCancerUndergoingChemotherapy.  
16 *Basic and clinical neuroscience* 2021;12(1):105-14. doi: 10.32598/bcn.12.1.1650.2  
17
- 18  
19 41. Sookprasert A, Johns NP, Pnunmanee A, et al. Melatonin in patients with cancer receiving  
20 chemotherapy: A randomized, double-blind, placebo-controlled trial. *Anticancer research*  
21 2014;34(12):7327-37.  
22
- 23  
24 42. Yennurajalingam S, Carmack C, Balachandran D, et al. Sleep disturbance in patients with cancer: a  
25 feasibility study of multimodal therapy. *BMJ supportive & palliative care* 2021;11(2):170-79.  
26 doi: 10.1136/bmjspcare-2019-001877 [published Online First: 2020/01/12]  
27
- 28  
29 43. The World Health Organization has developed a grading system for mucositis based on clinical  
30 appearance and functional status: The World Health Organization; 2018 [Available from:  
31 <http://www.gelclair.nl/Institutional.aspx?Pagina=239&SM=230&Lingua=EN> accessed 29/03  
32 2022.  
33
- 34  
35 44. Innominato PF, Lim AS, Palesh O, et al. The effect of melatonin on sleep and quality of life in patients  
36 with advanced breast cancer. *Supportive care in cancer : official journal of the Multinational*  
37 *Association of Supportive Care in Cancer* 2016;24(3):1097-105. doi: 10.1007/s00520-015-  
38 2883-6 [published Online First: 2015/08/12]  
39
- 40  
41 45. Del Fabbro E, Dev R, Hui D, et al. Effects of melatonin on appetite and other symptoms in patients  
42 with advanced cancer and cachexia: a double-blind placebo-controlled trial. *Journal of clinical*  
43 *oncology : official journal of the American Society of Clinical Oncology* 2013;31(10):1271-6. doi:  
44 10.1200/jco.2012.43.6766 [published Online First: 2013/02/27]  
45
- 46  
47 46. Russcher M, Koch BC, Nagtegaal JE, et al. Long-term effects of melatonin on quality of life and sleep  
48 in haemodialysis patients (Melody study): a randomized controlled trial. *British journal of*  
49 *clinical pharmacology* 2013;76(5):668-79. doi: 10.1111/bcp.12093 [published Online First:  
50 2013/02/26]  
51
- 52  
53 47. Sumsuzzman DM, Choi J, Jin Y, et al. Neurocognitive effects of melatonin treatment in healthy adults  
54  
55  
56  
57  
58  
59  
60

- 1  
2  
3 and individuals with Alzheimer's disease and insomnia: A systematic review and meta-analysis  
4 of randomized controlled trials. *Neuroscience and biobehavioral reviews* 2021;127:459-73. doi:  
5 10.1016/j.neubiorev.2021.04.034 [published Online First: 2021/05/07]  
6  
7  
8  
9 48. Baglioni C, Bostanova Z, Bacaro V, et al. A Systematic Review and Network Meta-Analysis of  
10 Randomized Controlled Trials Evaluating the Evidence Base of Melatonin, Light Exposure,  
11 Exercise, and Complementary and Alternative Medicine for Patients with Insomnia Disorder.  
12 *Journal of clinical medicine* 2020;9(6) doi: 10.3390/jcm9061949 [published Online First:  
13 2020/06/26]  
14  
15  
16  
17 49. Pereira N, Naufel MF, Ribeiro EB, et al. Influence of Dietary Sources of Melatonin on Sleep Quality:  
18 A Review. *Journal of food science* 2020;85(1):5-13. doi: 10.1111/1750-3841.14952 [published  
19 Online First: 2019/12/20]  
20  
21  
22 50. Fatemeh G, Sajjad M, Niloufar R, et al. Effect of melatonin supplementation on sleep quality: a  
23 systematic review and meta-analysis of randomized controlled trials. *Journal of neurology*  
24 2021 doi: 10.1007/s00415-020-10381-w [published Online First: 2021/01/09]  
25  
26  
27 51. Hrushesky WJM, Lis CG, Levin RD, et al. Daily evening melatonin prolongs survival among patients  
28 with advanced non-small-cell lung cancer. *Biological Rhythm Research* 2021:1-15. doi:  
29 10.1080/09291016.2021.1899485  
30  
31  
32  
33 52. Wade AG, Ford I, Crawford G, et al. Efficacy of prolonged release melatonin in insomnia patients  
34 aged 55-80 years: quality of sleep and next-day alertness outcomes. *Current medical research*  
35 *and opinion* 2007;23(10):2597-605. doi: 10.1185/030079907x233098 [published Online First:  
36 2007/09/19]  
37  
38  
39  
40 53. Ahn JH, Kim M, Park S, et al. Prolonged-release melatonin in Parkinson's disease patients with a  
41 poor sleep quality: A randomized trial. *Parkinsonism & related disorders* 2020;75:50-54. doi:  
42 10.1016/j.parkreldis.2020.03.029 [published Online First: 2020/06/02]  
43  
44  
45 54. Wilhelmsen-Langeland A, Saxvig IW, Pallesen S, et al. A randomized controlled trial with bright light  
46 and melatonin for the treatment of delayed sleep phase disorder: effects on subjective and  
47 objective sleepiness and cognitive function. *Journal of biological rhythms* 2013;28(5):306-21.  
48 doi: 10.1177/0748730413500126 [published Online First: 2013/10/18]  
49  
50  
51  
52 55. van Heukelom RO, Prins JB, Smits MG, et al. Influence of melatonin on fatigue severity in patients  
53 with chronic fatigue syndrome and late melatonin secretion. *European journal of neurology*  
54 2006;13(1):55-60. doi: 10.1111/j.1468-1331.2006.01132.x [published Online First:  
55 2006/01/20]  
56  
57  
58  
59  
60

- 1  
2  
3  
4 56. Fabi A, Bhargava R, Fatigoni S, et al. Cancer-related fatigue: ESMO Clinical Practice Guidelines for  
5 diagnosis and treatment. *Annals of oncology : official journal of the European Society for*  
6 *Medical Oncology* 2020;31(6):713-23. doi: 10.1016/j.annonc.2020.02.016 [published Online  
7 First: 2020/03/17]  
8  
9  
10 57. Hilfiker R, Meichtry A, Eicher M, et al. Exercise and other non-pharmaceutical interventions for  
11 cancer-related fatigue in patients during or after cancer treatment: a systematic review  
12 incorporating an indirect-comparisons meta-analysis. *British journal of sports medicine*  
13 2018;52(10):651-58. doi: 10.1136/bjsports-2016-096422 [published Online First: 2017/05/16]  
14  
15 58. Wu C, Zheng Y, Duan Y, et al. Nonpharmacological Interventions for Cancer-Related Fatigue: A  
16 Systematic Review and Bayesian Network Meta-Analysis. *Worldviews on evidence-based*  
17 *nursing* 2019;16(2):102-10. doi: 10.1111/wvn.12352 [published Online First: 2019/03/29]  
18  
19 59. Lee TYC, Curtin JP. The effects of melatonin prophylaxis on sensory recovery and postoperative pain  
20 following orthognathic surgery: a triple-blind randomized controlled trial and biochemical  
21 analysis. *International journal of oral and maxillofacial surgery* 2020;49(4):446-53. doi:  
22 10.1016/j.ijom.2019.07.006 [published Online First: 2019/08/20]  
23  
24 60. Lafli Tunay D, Türkün İlginel M, Ünlügenç H, et al. Comparison of the effects of preoperative  
25 melatonin or vitamin C administration on postoperative analgesia. *Bosnian journal of basic*  
26 *medical sciences* 2020;20(1):117-24. doi: 10.17305/bjbms.2019.4379 [published Online First:  
27 2019/08/30]  
28  
29 61. Keshavarzi F, Mahmoudzadeh F, Brand S, et al. Both melatonin and meloxicam improved sleep and  
30 pain in females with primary dysmenorrhea-results from a double-blind cross-over  
31 intervention pilot study. *Archives of women's mental health* 2018;21(6):601-09. doi:  
32 10.1007/s00737-018-0838-x [published Online First: 2018/04/06]  
33  
34 62. Gandolfi JV, Di Bernardo APA, Chanes DAV, et al. The Effects of Melatonin Supplementation on Sleep  
35 Quality and Assessment of the Serum Melatonin in ICU Patients: A Randomized Controlled  
36 Trial. *Critical care medicine* 2020;48(12):e1286-e93. doi: 10.1097/ccm.0000000000004690  
37 [published Online First: 2020/10/14]  
38  
39 63. Kirksey MA, Yoo D, Danninger T, et al. Impact of Melatonin on Sleep and Pain After Total Knee  
40 Arthroplasty Under Regional Anesthesia With Sedation: A Double-Blind, Randomized, Placebo-  
41 Controlled Pilot Study. *The Journal of arthroplasty* 2015;30(12):2370-5. doi:  
42 10.1016/j.arth.2015.06.034 [published Online First: 2015/07/16]  
43  
44 64. Neufeld NJ, Elnahal SM, Alvarez RH. Cancer pain: a review of epidemiology, clinical quality and value  
45 impact. *Future oncology (London, England)* 2017;13(9):833-41. doi: 10.2217/fo-2016-0423  
46  
47  
48  
49  
50  
51  
52  
53  
54  
55  
56  
57  
58  
59  
60



[published Online First: 2016/11/24]

65. Yang J, Wahner-Roedler DL, Zhou X, et al. Acupuncture for palliative cancer pain management: systematic review. *BMJ supportive & palliative care* 2021;11(3):264-70. doi: 10.1136/bmjspcare-2020-002638 [published Online First: 2021/01/15]
66. Ali T, Rahman SU, Hao Q, et al. Melatonin prevents neuroinflammation and relieves depression by attenuating autophagy impairment through FOXO3a regulation. *Journal of pineal research* 2020;69(2):e12667. doi: 10.1111/jpi.12667 [published Online First: 2020/05/07]
67. Shabani A, Foroozanfard F, Kavossian E, et al. Effects of melatonin administration on mental health parameters, metabolic and genetic profiles in women with polycystic ovary syndrome: A randomized, double-blind, placebo-controlled trial. *Journal of affective disorders* 2019;250:51-56. doi: 10.1016/j.jad.2019.02.066 [published Online First: 2019/03/05]
68. Daneshvar Kakhaki R, Ostadmohammadi V, Kouchaki E, et al. Melatonin supplementation and the effects on clinical and metabolic status in Parkinson's disease: A randomized, double-blind, placebo-controlled trial. *Clinical neurology and neurosurgery* 2020;195:105878. doi: 10.1016/j.clineuro.2020.105878 [published Online First: 2020/05/18]
69. Ostadmohammadi V, Soleimani A, Bahmani F, et al. The Effects of Melatonin Supplementation on Parameters of Mental Health, Glycemic Control, Markers of Cardiometabolic Risk, and Oxidative Stress in Diabetic Hemodialysis Patients: A Randomized, Double-Blind, Placebo-Controlled Trial. *Journal of renal nutrition : the official journal of the Council on Renal Nutrition of the National Kidney Foundation* 2020;30(3):242-50. doi: 10.1053/j.jrn.2019.08.003 [published Online First: 2019/10/11]
70. Madsen MT, Zahid JA, Hansen CH, et al. The effect of melatonin on depressive symptoms and anxiety in patients after acute coronary syndrome: The MEDACIS randomized clinical trial. *Journal of psychiatric research* 2019;119:84-94. doi: 10.1016/j.jpsychires.2019.09.014 [published Online First: 2019/10/07]
71. Qusted DJ, Gibson JC, Sharpley AL, et al. Melatonin In Acute Mania Investigation (MIAMI-UK). A randomized controlled trial of add-on melatonin in bipolar disorder. *Bipolar disorders* 2021;23(2):176-85. doi: 10.1111/bdi.12944 [published Online First: 2020/06/01]
72. Anderson PM, Lalla RV. Glutamine for Amelioration of Radiation and Chemotherapy Associated Mucositis during Cancer Therapy. *Nutrients* 2020;12(6) doi: 10.3390/nu12061675 [published Online First: 2020/06/10]
73. Akagi S, Fujiwara T, Nishida M, et al. The effectiveness of rebamipide mouthwash therapy for



- 1  
2  
3 radiotherapy and chemoradiotherapy-induced oral mucositis in patients with head and neck  
4 cancer: a systematic review and meta-analysis. *Journal of pharmaceutical health care and*  
5 *sciences* 2019;5:16. doi: 10.1186/s40780-019-0146-2 [published Online First: 2019/08/02]  
6  
7  
8  
9 74. Kuba S, Yamanouchi K, Matsumoto M, et al. Study protocol for efficacy and safety of steroid-  
10 containing mouthwash to prevent chemotherapy-induced stomatitis in women with breast  
11 cancer: a multicentre, open-label, randomised phase 2 study. *BMJ open* 2020;10(2):e033446.  
12 doi: 10.1136/bmjopen-2019-033446 [published Online First: 2020/02/16]  
13  
14  
15 75. Lissoni P, Chilelli M, Villa S, et al. Five years survival in metastatic non-small cell lung cancer patients  
16 treated with chemotherapy alone or chemotherapy and melatonin: a randomized trial. *J Pineal*  
17 *Res* 2003;35(1):12-5. doi: 10.1034/j.1600-079x.2003.00032.x [published Online First:  
18 2003/06/26]  
19  
20  
21  
22 76. Correa MEP, Cheng KKF, Chiang K, et al. Systematic review of oral cryotherapy for the management  
23 of oral mucositis in cancer patients and clinical practice guidelines. *Supportive care in cancer :*  
24 *official journal of the Multinational Association of Supportive Care in Cancer* 2020;28(5):2449-  
25 56. doi: 10.1007/s00520-019-05217-x [published Online First: 2019/12/15]  
26  
27  
28  
29 77. Shu Z, Li P, Yu B, et al. The effectiveness of probiotics in prevention and treatment of cancer therapy-  
30 induced oral mucositis: A systematic review and meta-analysis. *Oral oncology*  
31 2020;102:104559. doi: 10.1016/j.oraloncology.2019.104559 [published Online First:  
32 2020/01/11]  
33  
34  
35  
36 78. Zadik Y, Arany PR, Fregnani ER, et al. Systematic review of photobiomodulation for the management  
37 of oral mucositis in cancer patients and clinical practice guidelines. *Supportive care in cancer :*  
38 *official journal of the Multinational Association of Supportive Care in Cancer* 2019;27(10):3969-  
39 83. doi: 10.1007/s00520-019-04890-2 [published Online First: 2019/07/10]  
40  
41  
42  
43 79. Cronshaw M, Parker S, Anagnostaki E, et al. Photobiomodulation and Oral Mucositis: A Systematic  
44 Review. *Dentistry journal* 2020;8(3) doi: 10.3390/dj8030087 [published Online First:  
45 2020/08/09]  
46  
47  
48 80. Gurunathan S, Qasim M, Kang MH, et al. Role and Therapeutic Potential of Melatonin in Various  
49 Type of Cancers. *OncoTargets and therapy* 2021;14:2019-52. doi: 10.2147/ott.S298512  
50 [published Online First: 2021/03/30]  
51  
52  
53 81. Li Y, Li S, Zhou Y, et al. Melatonin for the prevention and treatment of cancer. *Oncotarget*  
54 2017;8(24):39896-921. doi: 10.18632/oncotarget.16379 [published Online First: 2017/04/19]  
55  
56  
57  
58  
59  
60

1  
2  
3  
4  
5  
6  
7  
8  
9  
10  
11  
12  
13  
14  
15  
16  
17  
18  
19  
20  
21  
22  
23  
24  
25  
26  
27  
28  
29  
30  
31  
32  
33  
34  
35  
36  
37  
38  
39  
40  
41  
42  
43  
44  
45  
46  
47  
48  
49  
50  
51  
52  
53  
54  
55  
56  
57  
58  
59  
60



362x322mm (57 x 57 DPI)

1  
2  
3  
4  
5  
6  
7  
8  
9  
10  
11  
12  
13  
14  
15  
16  
17  
18  
19  
20  
21  
22  
23  
24  
25  
26  
27  
28  
29  
30  
31  
32  
33  
34  
35  
36  
37  
38  
39  
40  
41  
42  
43  
44  
45  
46  
47  
48  
49  
50  
51  
52  
53  
54  
55  
56  
57  
58  
59  
60

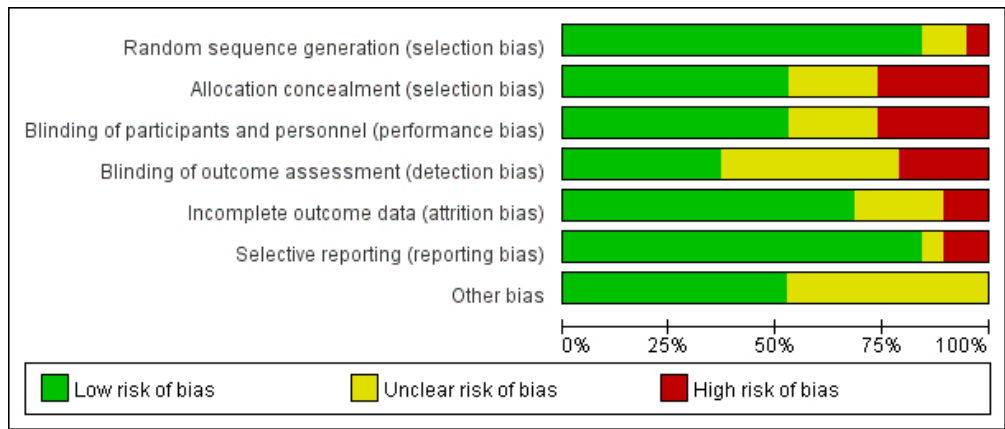

213x90mm (72 x 72 DPI)

1  
2  
3  
4  
5  
6  
7  
8  
9  
10  
11  
12  
13  
14  
15  
16  
17  
18  
19  
20  
21  
22  
23  
24  
25  
26  
27  
28  
29  
30  
31  
32  
33  
34  
35  
36  
37  
38  
39  
40  
41  
42  
43  
44  
45  
46  
47  
48  
49  
50  
51  
52  
53  
54  
55  
56  
57  
58  
59  
60

|                            | Random sequence generation (selection bias) | Allocation concealment (selection bias) | Blinding of participants and personnel (performance bias) | Blinding of outcome assessment (detection bias) | Incomplete outcome data (attrition bias) | Selective reporting (reporting bias) | Other bias |
|----------------------------|---------------------------------------------|-----------------------------------------|-----------------------------------------------------------|-------------------------------------------------|------------------------------------------|--------------------------------------|------------|
| Borbalas et al 2021        | +                                           | ?                                       | ?                                                         | ?                                               | +                                        | +                                    | +          |
| Chen et al 2014            | +                                           | ?                                       | +                                                         | ?                                               | +                                        | +                                    | ?          |
| Elsabagh et al 2019        | -                                           | -                                       | -                                                         | ?                                               | +                                        | +                                    | +          |
| Grutsch et al 2021         | +                                           | +                                       | +                                                         | +                                               | ?                                        | +                                    | ?          |
| Hansen et al 2014          | +                                           | +                                       | +                                                         | -                                               | ?                                        | +                                    | ?          |
| Kurdi et al 2016           | +                                           | +                                       | +                                                         | ?                                               | +                                        | +                                    | +          |
| Madsen et al 2016          | +                                           | +                                       | +                                                         | +                                               | +                                        | +                                    | +          |
| Onseng et al 2017          | +                                           | -                                       | ?                                                         | ?                                               | -                                        | -                                    | ?          |
| P. Lissoni et al 1997      | +                                           | -                                       | -                                                         | -                                               | +                                        | +                                    | ?          |
| P. Lissoni et al 1999      | +                                           | -                                       | -                                                         | -                                               | -                                        | -                                    | ?          |
| P. Lissoni et al 2002      | ?                                           | ?                                       | ?                                                         | ?                                               | +                                        | ?                                    | ?          |
| Palmer et al 2019          | +                                           | +                                       | +                                                         | +                                               | ?                                        | +                                    | +          |
| Palmer et al 2020          | +                                           | +                                       | +                                                         | +                                               | +                                        | +                                    | +          |
| Pashaki et al 2021         | +                                           | +                                       | +                                                         | ?                                               | +                                        | +                                    | ?          |
| Rasmussen et al 2015       | +                                           | +                                       | +                                                         | +                                               | +                                        | +                                    | +          |
| Seely et al 2021           | +                                           | +                                       | +                                                         | +                                               | +                                        | +                                    | +          |
| Shahrokhi et al 2021       | ?                                           | ?                                       | -                                                         | ?                                               | +                                        | +                                    | ?          |
| Sookprasert et al 2014     | +                                           | -                                       | ?                                                         | -                                               | +                                        | +                                    | +          |
| Yennurajalingam et al 2019 | +                                           | +                                       | -                                                         | +                                               | ?                                        | +                                    | +          |

136x321mm (72 x 72 DPI)

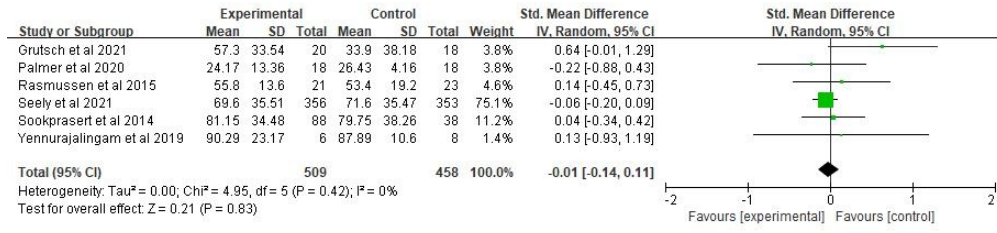

160x36mm (144 x 144 DPI)

1  
2  
3  
4  
5  
6  
7  
8  
9  
10  
11  
12  
13  
14  
15  
16  
17  
18  
19  
20  
21  
22  
23  
24  
25  
26  
27  
28  
29  
30  
31  
32  
33  
34  
35  
36  
37  
38  
39  
40  
41  
42  
43  
44  
45  
46  
47  
48  
49  
50  
51  
52  
53  
54  
55  
56  
57  
58  
59  
60

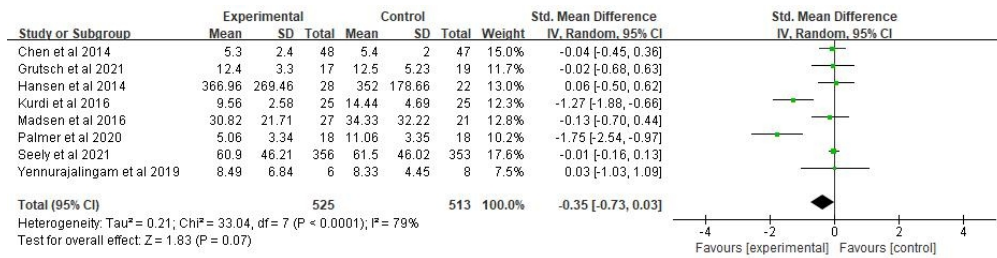

164x42mm (144 x 144 DPI)

1  
2  
3  
4  
5  
6  
7  
8  
9  
10  
11  
12  
13  
14  
15  
16  
17  
18  
19  
20  
21  
22  
23  
24  
25  
26  
27  
28  
29  
30  
31  
32  
33  
34  
35  
36  
37  
38  
39  
40  
41  
42  
43  
44  
45  
46  
47  
48  
49  
50  
51  
52  
53  
54  
55  
56  
57  
58  
59  
60

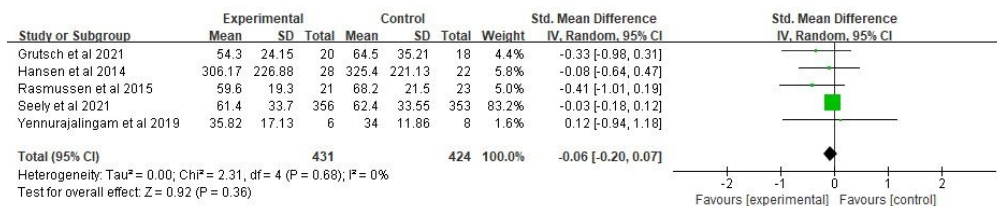

164x33mm (144 x 144 DPI)

1  
2  
3  
4  
5  
6  
7  
8  
9  
10  
11  
12  
13  
14  
15  
16  
17  
18  
19  
20  
21  
22  
23  
24  
25  
26  
27  
28  
29  
30  
31  
32  
33  
34  
35  
36  
37  
38  
39  
40  
41  
42  
43  
44  
45  
46  
47  
48  
49  
50  
51  
52  
53  
54  
55  
56  
57  
58  
59  
60

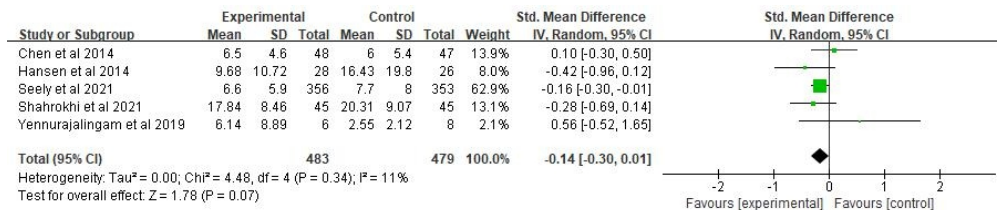

159x33mm (144 x 144 DPI)



1  
2  
3  
4  
5  
6  
7  
8  
9  
10  
11  
12  
13  
14  
15  
16  
17  
18  
19  
20  
21  
22  
23  
24  
25  
26  
27  
28  
29  
30  
31  
32  
33  
34  
35  
36  
37  
38  
39  
40  
41  
42  
43  
44  
45  
46  
47  
48  
49  
50  
51  
52  
53  
54  
55  
56  
57  
58  
59  
60

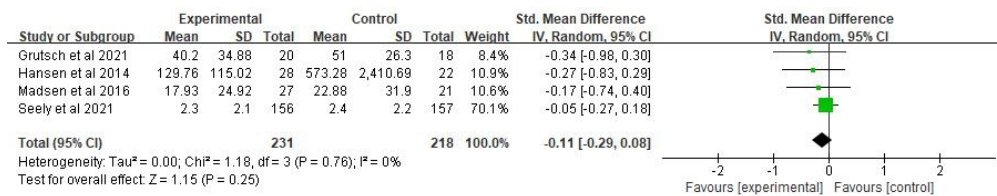

159x31mm (144 x 144 DPI)

1  
2  
3  
4  
5  
6  
7  
8  
9  
10  
11  
12  
13  
14  
15  
16  
17  
18  
19  
20  
21  
22  
23  
24  
25  
26  
27  
28  
29  
30  
31  
32  
33  
34  
35  
36  
37  
38  
39  
40  
41  
42  
43  
44  
45  
46  
47  
48  
49  
50  
51  
52  
53  
54  
55  
56  
57  
58  
59  
60

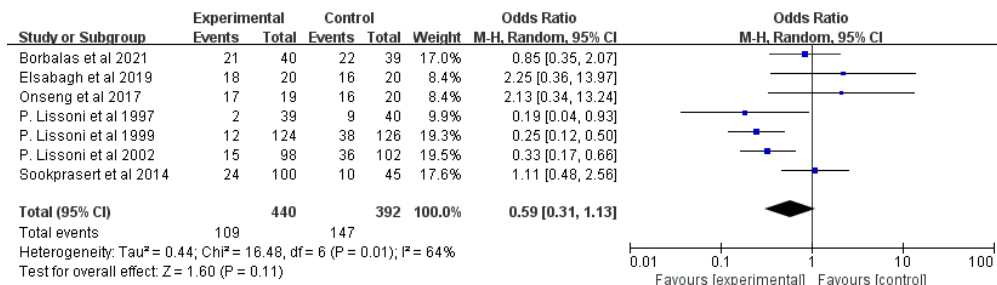

290x84mm (72 x 72 DPI)

1  
2  
3  
4  
5  
6  
7  
8  
9  
10  
11  
12  
13  
14  
15  
16  
17  
18  
19  
20  
21  
22  
23  
24  
25  
26  
27  
28  
29  
30  
31  
32  
33  
34  
35  
36  
37  
38  
39  
40  
41  
42  
43  
44  
45  
46  
47  
48  
49  
50  
51  
52  
53  
54  
55  
56  
57  
58  
59  
60

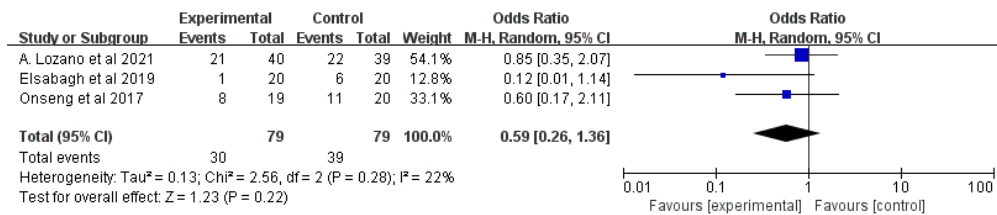

285x62mm (72 x 72 DPI)

| <b>Search strategy</b> |                                                                                        |
|------------------------|----------------------------------------------------------------------------------------|
| #1                     | TS=(neoplasm OR Neoplasia* OR Tumor* OR Cancer* OR Malignancy OR Malignancies)         |
| #2                     | TS=(melatonin)                                                                         |
| #3                     | TS=(Pain)                                                                              |
| #4                     | TS=(fatigue OR lassitude)                                                              |
| #5                     | TS=(oral mucositis OR mucositides OR stomatitis)                                       |
| #6                     | TS=(Depression* OR Depressive)                                                         |
| #7                     | TS=(Appetite* OR Alteration*)                                                          |
| #8                     | TS=(Quality of life OR Life Quality OR Health Related Quality Of Life OR HRQOL OR QOL) |
| #9                     | TS=(sleep disorder OR Insomnia OR sleep dysfunction OR Sleeplessness)                  |
| #10                    | TS=(randomized controlled trial OR randomized OR placebo OR trial OR controlled)       |
| #11                    | (((((#9) OR #8) OR #7) OR #6) OR #5) OR #4) OR #3                                      |
| #12                    | ((#11) AND #10) AND #1) AND #2                                                         |



## PRISMA 2020 Checklist

1  
2  
3  
4  
5  
6  
7  
8  
9  
10  
11  
12  
13  
14  
15  
16  
17  
18  
19  
20  
21  
22  
23  
24  
25  
26  
27  
28  
29  
30  
31  
32  
33  
34  
35  
36  
37  
38  
39  
40  
41  
42  
43  
44  
45  
46  
47

| Section and Topic             | Item # | Checklist item                                                                                                                                                                                                                                                                                       | Location where item is reported  |
|-------------------------------|--------|------------------------------------------------------------------------------------------------------------------------------------------------------------------------------------------------------------------------------------------------------------------------------------------------------|----------------------------------|
| <b>TITLE</b>                  |        |                                                                                                                                                                                                                                                                                                      |                                  |
| Title                         | 1      | Identify the report as a systematic review.                                                                                                                                                                                                                                                          | Page 1 in "Title"                |
| <b>ABSTRACT</b>               |        |                                                                                                                                                                                                                                                                                                      |                                  |
| Abstract                      | 2      | See the PRISMA 2020 for Abstracts checklist.                                                                                                                                                                                                                                                         | Page 1 in "Abstract"             |
| <b>INTRODUCTION</b>           |        |                                                                                                                                                                                                                                                                                                      |                                  |
| Rationale                     | 3      | Describe the rationale for the review in the context of existing knowledge.                                                                                                                                                                                                                          | Page 2 in "Introduction"         |
| Objectives                    | 4      | Provide an explicit statement of the objective(s) or question(s) the review addresses.                                                                                                                                                                                                               | Page 2 in "Introduction"         |
| <b>METHODS</b>                |        |                                                                                                                                                                                                                                                                                                      |                                  |
| Eligibility criteria          | 5      | Specify the inclusion and exclusion criteria for the review and how studies were grouped for the syntheses.                                                                                                                                                                                          | Page 3 in "Eligibility criteria" |
| Information sources           | 6      | Specify all databases, registers, websites, organisations, reference lists and other sources searched or consulted to identify studies. Specify the date when each source was last searched or consulted.                                                                                            | Page 3 in "Search strategy"      |
| Search strategy               | 7      | Present the full search strategies for all databases, registers and websites, including any filters and limits used.                                                                                                                                                                                 | Page 3 in "Search strategy"      |
| Selection process             | 8      | Specify the methods used to decide whether a study met the inclusion criteria of the review, including how many reviewers screened each record and each report retrieved, whether they worked independently, and if applicable, details of automation tools used in the process.                     | Page 3 in "Data extraction"      |
| Data collection process       | 9      | Specify the methods used to collect data from reports, including how many reviewers collected data from each report, whether they worked independently, any processes for obtaining or confirming data from study investigators, and if applicable, details of automation tools used in the process. | Page 3 in "Data extraction"      |
| Data items                    | 10a    | List and define all outcomes for which data were sought. Specify whether all results that were compatible with each outcome domain in each study were sought (e.g. for all measures, time points, analyses), and if not, the methods used to decide which results to collect.                        | Page 3 in "Data extraction"      |
|                               | 10b    | List and define all other variables for which data were sought (e.g. participant and intervention characteristics, funding sources). Describe any assumptions made about any missing or unclear information.                                                                                         | Page 5-6 in "table 1"            |
| Study risk of bias assessment | 11     | Specify the methods used to assess risk of bias in the included studies, including details of the tool(s) used, how many reviewers assessed each study and whether they worked independently, and if applicable, details of automation tools used in the process.                                    | Page 4 in "Quality assessment"   |
| Effect measures               | 12     | Specify for each outcome the effect measure(s) (e.g. risk ratio, mean difference) used in the synthesis or presentation of results.                                                                                                                                                                  | Page 3 in "Data analysis"        |
| Synthesis methods             | 13a    | Describe the processes used to decide which studies were eligible for each synthesis (e.g. tabulating the study intervention characteristics and comparing against the planned groups for each synthesis (item #5)).                                                                                 | Page 3 in "Data analysis"        |
|                               | 13b    | Describe any methods required to prepare the data for presentation or synthesis, such as handling of missing summary statistics, or data                                                                                                                                                             | Page 3 in                        |

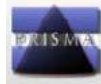

## PRISMA 2020 Checklist

| Section and Topic             | Item # | Checklist item                                                                                                                                                                                                                                                                       | Location where item is reported        |
|-------------------------------|--------|--------------------------------------------------------------------------------------------------------------------------------------------------------------------------------------------------------------------------------------------------------------------------------------|----------------------------------------|
|                               |        | conversions.                                                                                                                                                                                                                                                                         | "Data analysis"                        |
|                               | 13c    | Describe any methods used to tabulate or visually display results of individual studies and syntheses.                                                                                                                                                                               | Page 3 in "Data analysis"              |
|                               | 13d    | Describe any methods used to synthesize results and provide a rationale for the choice(s). If meta-analysis was performed, describe the model(s), method(s) to identify the presence and extent of statistical heterogeneity, and software package(s) used.                          | Page 3 in "Data analysis"              |
|                               | 13e    | Describe any methods used to explore possible causes of heterogeneity among study results (e.g. subgroup analysis, meta-regression).                                                                                                                                                 | Page 3 in "Data analysis"              |
|                               | 13f    | Describe any sensitivity analyses conducted to assess robustness of the synthesized results.                                                                                                                                                                                         | Page 3 in "Data analysis"              |
| Reporting bias assessment     | 14     | Describe any methods used to assess risk of bias due to missing results in a synthesis (arising from reporting biases).                                                                                                                                                              | Page 3 in "Data analysis"              |
| Certainty assessment          | 15     | Describe any methods used to assess certainty (or confidence) in the body of evidence for an outcome.                                                                                                                                                                                | Page 3 in "Risk of bias assessment"    |
| <b>RESULTS</b>                |        |                                                                                                                                                                                                                                                                                      |                                        |
| Study selection               | 16a    | Describe the results of the search and selection process, from the number of records identified in the search to the number of studies included in the review, ideally using a flow diagram.                                                                                         | Page 4 in "Literature search"          |
|                               | 16b    | Cite studies that might appear to meet the inclusion criteria, but which were excluded, and explain why they were excluded.                                                                                                                                                          | Page 4 in "Literature search"          |
| Study characteristics         | 17     | Cite each included study and present its characteristics.                                                                                                                                                                                                                            | Page 4 in "Literature characteristics" |
| Risk of bias in studies       | 18     | Present assessments of risk of bias for each included study.                                                                                                                                                                                                                         | Page 4 in "Quality assessment"         |
| Results of individual studies | 19     | For all outcomes, present, for each study: (a) summary statistics for each group (where appropriate) and (b) an effect estimate and its precision (e.g. confidence/credible interval), ideally using structured tables or plots.                                                     | Page 4 in "Literature characteristics" |
| Results of syntheses          | 20a    | For each synthesis, briefly summarise the characteristics and risk of bias among contributing studies.                                                                                                                                                                               | Page 4 in "Quality assessment"         |
|                               | 20b    | Present results of all statistical syntheses conducted. If meta-analysis was done, present for each the summary estimate and its precision (e.g. confidence/credible interval) and measures of statistical heterogeneity. If comparing groups, describe the direction of the effect. | Page 7-9                               |
|                               | 20c    | Present results of all investigations of possible causes of heterogeneity among study results.                                                                                                                                                                                       | Page 7-9                               |
|                               | 20d    | Present results of all sensitivity analyses conducted to assess the robustness of the synthesized results.                                                                                                                                                                           | Page 7-9                               |
| Reporting biases              | 21     | Present assessments of risk of bias due to missing results (arising from reporting biases) for each synthesis assessed.                                                                                                                                                              | Page 7-9                               |
| Certainty of                  | 22     | Present assessments of certainty (or confidence) in the body of evidence for each outcome assessed.                                                                                                                                                                                  | Page 7-9                               |



## PRISMA 2020 Checklist

1  
2  
3  
4  
5  
6  
7  
8  
9  
10  
11  
12  
13  
14  
15  
16  
17  
18  
19  
20  
21  
22  
23  
24  
25  
26  
27  
28  
29  
30  
31  
32  
33  
34  
35  
36  
37  
38  
39  
40  
41  
42  
43  
44  
45  
46  
47

| Section and Topic                              | Item # | Checklist item                                                                                                                                                                                                                             | Location where item is reported |
|------------------------------------------------|--------|--------------------------------------------------------------------------------------------------------------------------------------------------------------------------------------------------------------------------------------------|---------------------------------|
| evidence                                       |        |                                                                                                                                                                                                                                            |                                 |
| <b>DISCUSSION</b>                              |        |                                                                                                                                                                                                                                            |                                 |
| Discussion                                     | 23a    | Provide a general interpretation of the results in the context of other evidence.                                                                                                                                                          | Page 9-12                       |
|                                                | 23b    | Discuss any limitations of the evidence included in the review.                                                                                                                                                                            | Page 9-12                       |
|                                                | 23c    | Discuss any limitations of the review processes used.                                                                                                                                                                                      | Page 9-12                       |
|                                                | 23d    | Discuss implications of the results for practice, policy, and future research.                                                                                                                                                             | Page 9-12                       |
| <b>OTHER INFORMATION</b>                       |        |                                                                                                                                                                                                                                            |                                 |
| Registration and protocol                      | 24a    | Provide registration information for the review, including register name and registration number, or state that the review was not registered.                                                                                             | Page 2 in "method"              |
|                                                | 24b    | Indicate where the review protocol can be accessed, or state that a protocol was not prepared.                                                                                                                                             | Page 2 in "method"              |
|                                                | 24c    | Describe and explain any amendments to information provided at registration or in the protocol.                                                                                                                                            | Page 2 in "method"              |
| Support                                        | 25     | Describe sources of financial or non-financial support for the review, and the role of the funders or sponsors in the review.                                                                                                              | Page 13 in "Footnotes"          |
| Competing interests                            | 26     | Declare any competing interests of review authors.                                                                                                                                                                                         | Page 13 in "Footnotes"          |
| Availability of data, code and other materials | 27     | Report which of the following are publicly available and where they can be found: template data collection forms; data extracted from included studies; data used for all analyses; analytic code; any other materials used in the review. | Page 13 in "Footnotes"          |

From: Page MJ, McKenzie JE, Bossuyt PM, Boutron I, Hoffmann TC, Mulrow CD, et al. The PRISMA 2020 statement: an updated guideline for reporting systematic reviews. *BMJ* 2021;372:n71. doi: 10.1136/bmj.n71

For more information, visit: <http://www.prisma-statement.org/>

# BMJ Open

## Effect of melatonin on quality of life and symptoms in patients with cancer: a systematic review and meta-analysis of randomized controlled trials

|                                 |                                                                                                                                                                                                                                                                                                                                                                                                                                                                                                                                                                                                                                                                                                                                                                                                                                                                                                                                                                                                                                                                                                                        |
|---------------------------------|------------------------------------------------------------------------------------------------------------------------------------------------------------------------------------------------------------------------------------------------------------------------------------------------------------------------------------------------------------------------------------------------------------------------------------------------------------------------------------------------------------------------------------------------------------------------------------------------------------------------------------------------------------------------------------------------------------------------------------------------------------------------------------------------------------------------------------------------------------------------------------------------------------------------------------------------------------------------------------------------------------------------------------------------------------------------------------------------------------------------|
| Journal:                        | <i>BMJ Open</i>                                                                                                                                                                                                                                                                                                                                                                                                                                                                                                                                                                                                                                                                                                                                                                                                                                                                                                                                                                                                                                                                                                        |
| Manuscript ID                   | bmjopen-2022-060912.R2                                                                                                                                                                                                                                                                                                                                                                                                                                                                                                                                                                                                                                                                                                                                                                                                                                                                                                                                                                                                                                                                                                 |
| Article Type:                   | Original research                                                                                                                                                                                                                                                                                                                                                                                                                                                                                                                                                                                                                                                                                                                                                                                                                                                                                                                                                                                                                                                                                                      |
| Date Submitted by the Author:   | 29-May-2022                                                                                                                                                                                                                                                                                                                                                                                                                                                                                                                                                                                                                                                                                                                                                                                                                                                                                                                                                                                                                                                                                                            |
| Complete List of Authors:       | <p>Fan, Rongrong; Hunan Cancer Hospital/Affiliated Cancer Hospital of Xiangya nursing school of Central South University, Changsha, China/Xiangya Center for Evidence-Based Practice &amp; Healthcare Innovation: A Joanna Briggs Institute Affiliated Group, Department of Nursing Teaching and Research</p> <p>Bu, Xiaofan; Xiangya nursing school of Central South University, Changsha, China/Xiangya Center for Evidence-Based Practice &amp; Healthcare Innovation: A Joanna Briggs Institute Affiliated Group</p> <p>Yang, Siyu; Hunan Cancer Hospital</p> <p>Tan, Yan; Hunan Cancer Hospital, Department of Gastrointestinal surgery</p> <p>Wang, Tongyu; Hunan Cancer Hospital, Department of Nursing Teaching and Research</p> <p>Chen, Hongyun; Hunan Cancer Hospital, Department of Nursing Teaching and Research</p> <p>LI, Xuying; Hunan Cancer Hospital/Affiliated Cancer Hospital of Xiangya nursing school of Central South University, Changsha, China/Xiangya Center for Evidence-Based Practice &amp; Healthcare Innovation: A Joanna Briggs Institute Affiliated Group, Department of Nursing</p> |
| <b>Primary Subject Heading</b>: | Complementary medicine                                                                                                                                                                                                                                                                                                                                                                                                                                                                                                                                                                                                                                                                                                                                                                                                                                                                                                                                                                                                                                                                                                 |
| Secondary Subject Heading:      | Complementary medicine, Evidence based practice                                                                                                                                                                                                                                                                                                                                                                                                                                                                                                                                                                                                                                                                                                                                                                                                                                                                                                                                                                                                                                                                        |
| Keywords:                       | Adult oncology < ONCOLOGY, Pharmacology < TROPICAL MEDICINE, CLINICAL PHARMACOLOGY                                                                                                                                                                                                                                                                                                                                                                                                                                                                                                                                                                                                                                                                                                                                                                                                                                                                                                                                                                                                                                     |
|                                 |                                                                                                                                                                                                                                                                                                                                                                                                                                                                                                                                                                                                                                                                                                                                                                                                                                                                                                                                                                                                                                                                                                                        |

SCHOLARONE™  
Manuscripts





I, the Submitting Author has the right to grant and does grant on behalf of all authors of the Work (as defined in the below author licence), an exclusive licence and/or a non-exclusive licence for contributions from authors who are: i) UK Crown employees; ii) where BMJ has agreed a CC-BY licence shall apply, and/or iii) in accordance with the terms applicable for US Federal Government officers or employees acting as part of their official duties; on a worldwide, perpetual, irrevocable, royalty-free basis to BMJ Publishing Group Ltd ("BMJ") its licensees and where the relevant Journal is co-owned by BMJ to the co-owners of the Journal, to publish the Work in this journal and any other BMJ products and to exploit all rights, as set out in our [licence](#).

The Submitting Author accepts and understands that any supply made under these terms is made by BMJ to the Submitting Author unless you are acting as an employee on behalf of your employer or a postgraduate student of an affiliated institution which is paying any applicable article publishing charge ("APC") for Open Access articles. Where the Submitting Author wishes to make the Work available on an Open Access basis (and intends to pay the relevant APC), the terms of reuse of such Open Access shall be governed by a Creative Commons licence – details of these licences and which [Creative Commons](#) licence will apply to this Work are set out in our licence referred to above.

Other than as permitted in any relevant BMJ Author's Self Archiving Policies, I confirm this Work has not been accepted for publication elsewhere, is not being considered for publication elsewhere and does not duplicate material already published. I confirm all authors consent to publication of this Work and authorise the granting of this licence.

1  
2  
3 **Effect of melatonin on quality of life and symptoms in patients with cancer: a systematic**  
4 **review and meta-analysis of randomized controlled trials**  
5  
6

7 Rongrong Fan<sup>1</sup>, Xiaofan Bu<sup>2</sup>, Siyu Yang<sup>3</sup>, Yan Tan<sup>4</sup>, Tongyu Wang<sup>5</sup>, Hongyun Chen<sup>6</sup>, Xuying Li<sup>7\*</sup>  
8  
9

10 **Affiliations**

11  
12 1 Master, Department of Nursing Teaching and Research, Hunan Cancer Hospital/Affiliated Cancer  
13 Hospital of Xiangya nursing school of Central South University, Changsha, China.  
14

15  
16 2 Master, Xiangya nursing school of Central South University, Changsha, China.  
17

18  
19 3 Master, Department of Nursing Teaching and Research, Hunan Cancer Hospital/Affiliated Cancer  
20 Hospital of Xiangya nursing school of Central South University, Changsha, China.  
21

22  
23 4 Master, Department of Gastrointestinal surgery, Hunan Cancer Hospital/Affiliated Cancer Hospital of  
24 Xiangya nursing school of Central South University, Changsha, China.  
25

26  
27 5 Master, Department of Nursing Teaching and Research, Hunan Cancer Hospital/Affiliated Cancer  
28 Hospital of Xiangya nursing school of Central South University, Changsha, China.  
29

30  
31 6 Master, Department of Nursing Teaching and Research, Hunan Cancer Hospital/Affiliated Cancer  
32 Hospital of Xiangya nursing school of Central South University, Changsha, China.  
33

34  
35 7 PHD, Department of Nursing, Hunan Cancer Hospital/Affiliated Cancer Hospital of Xiangya nursing  
36 school of Central South University, Changsha, China. Electronic address: lixuying@hnca.org.cn  
37  
38

39 **Abstract**

40  
41 **Objective** This study systematically reviewed the effect of melatonin on quality of life (QoL) and  
42 symptoms among cancer patients.  
43  
44

45  
46 **Design** Systematic review and meta-analysis.  
47

48  
49 **Data sources** Cochrane Library, PubMed, Embase, Web of Science, Medline, CINAHL, Scopus,  
50 Clinical Trials.gov, China Biology Medicine (CBM), ProQuest and Open Gray, were searched  
51 from inception through November 2021.  
52

53  
54 **Eligibility criteria** We included randomized controlled trials (RCTs) assessing the effects of  
55 melatonin on QoL, sleep quality, fatigue, depression, pain, stomatitis rate and stomatitis severity  
56 in adult patients with cancer, without language restrictions. Studies that reported the effects of  
57 melatonin along with other interventions and had incomplete or absent outcome data were  
58  
59  
60

1  
2  
3 excluded.

4  
5  
6 **Data extraction and synthesis** Two independent reviewers extracted data, and another two  
7 reviewers assessed the risk of bias. The risk of bias for each eligible study was assessed using the  
8 Cochrane assessment tool. The mean difference or standard mean difference with 95% CIs was  
9 used in the computation of continuous variables to synthesise data. The relative risk was used for  
10 dichotomous outcomes. Heterogeneity was assessed and quantified ( $I^2$  statistic).

11  
12  
13  
14 **Results** A total of 19 qualified studies that included 2101 cancer patients (melatonin: 1078, control:  
15 1023) were included in the meta-analysis. The results indicated that melatonin had no significant  
16 effect on QoL [SMD = -0.01, 95% CI (-0.14, 0.11),  $P = 0.83$ ], sleep quality [SMD = -0.18, 95% CI  
17 (-0.62, 0.26),  $P = 0.42$ ], fatigue [SMD = -0.34, 95% CI (-0.73, 0.06),  $P = 0.10$ ], pain [SMD = -0.34,  
18 95% CI (-0.7, 0.02),  $P = 0.06$ ] or stomatitis severity [RR = 0.78, 95% CI (0.47, 1.30),  $P = 0.35$ ].  
19 MLT reduced stomatitis rate among patients with cancer [RR = 0.47, 95% CI (0.26, 0.88),  $P = 0.02$ ],  
20 except those with head and neck cancer [RR = 1.09, 95% CI (0.92, 1.29),  $P = 0.35$ ]. MLT eased  
21 depression in patients who received administration for more than 14 days [SMD = -0.14, 95% CI (-  
22 0.27, -0.01),  $P = 0.03$ ], and those who underwent surgery [SMD = -0.17, 95% CI (-0.32, -0.03),  $P =$   
23 0.02].

24  
25  
26  
27  
28  
29  
30 **Conclusion** The findings showed that MLT did not improve the QoL, sleep quality, fatigue, pain  
31 or stomatitis severity among patients with cancer. It had a limited effect on decreasing the  
32 stomatitis rate and easing depression. Different treatments, durations and cancer types were the  
33 main sources of heterogeneity. Further large-scale RCTs are urgently needed. In addition, the  
34 effects of different combinations of MLT dosage and duration, administration types and joint  
35 measures are worthy of further study.

#### 36 37 38 39 **PROSPERO registration number**

40  
41  
42 CRD42021292855.

#### 43 44 **Strengths and limitations of this study**

- 45 ● A strict search strategy was used in multiple databases.
- 46 ● Most of the studies were of high quality with a low risk of bias, which could further lend  
47 confidence to the current pooled results.
- 48 ● We widely explored the effectiveness of MLT in different populations, treatments, dosages,  
49 and durations in subgroup analysis.
- 50 ● For every dimension of MLT, including QoL, sleep, fatigue, depression, pain and stomatitis,  
51 the literature is limited, which limits the generality of the conclusion.

- The main significant results were from subgroup analysis of the limited studies, and the results should be interpreted prudently.

**Key words:** cancer patients, symptoms, QoL, melatonin, meta-analysis

## Introduction

Melatonin (MLT) is an important endogenous indolamine that is synthesized and secreted into the systemic circulation and cerebrospinal fluid by the pineal gland and has recognized antiaging, anti-inflammatory, and antioxidant properties.<sup>1</sup> As a strong antifibrotic agent,<sup>2</sup> MLT can be used as a desired preconditioning agent in cell-based therapy.<sup>3,4</sup> It also has a substantial role in regulating the circadian rhythm and sleep during the night.<sup>5,6</sup> Recent studies have proven the effect of MLT on limiting skeletal muscle frailty, prolonging physical performance,<sup>7</sup> and preventing bone loss.<sup>8</sup> In the oncology field, MLT has significantly apoptotic, angiogenic, oncostatic, and antiproliferative effects on various oncological cells.<sup>9</sup> It was proven that low levels of MLT might be a risk factor for breast cancer.<sup>10</sup> Meanwhile, MLT coadministration improves the sensitivity of cancers to inhibition by conventional drugs and reduces the toxic consequences of anticancer drugs while increasing their efficacy.<sup>11</sup> There is major concern about the symptoms induced by cancer and cancer treatment that patients encounter, including physical symptoms and psychological/spiritual distress,<sup>12</sup> leading to decreased QoL. Equally, MLT plays an important role in enhancing QoL by improving survival and decreasing symptoms.<sup>13</sup> The positive association between MLT and various health outcomes in cancer patients has been shown in some studies.<sup>14</sup> A recent meta-analysis revealed that MLT may benefit cancer patients by improving survival and ameliorating the side effects of chemotherapy.<sup>15</sup> Palmer et al, showed the neuroprotective effect of MLT to counteract the adverse effects of chemotherapy on cognitive function, sleep quality and depressive symptoms in breast cancer patients.<sup>16</sup> A recent clinical trial concluded that MLT supply decreased the levels of fatigue in patients with breast cancer.<sup>17</sup> However, some of the recent published findings suggest conflicting results<sup>18,19</sup> that MLT intervention cannot improve the QoL, reduce the symptom burden, or present the uncertain results.<sup>20</sup> We are not aware of any systematic reviews and meta-analyses that have synthesized the evidence of the function of MLT in cancer patients. The effect of MLT on health outcomes in the cancer group remains nonspecific and ambiguous. Thus, with accumulating evidence, we performed a systematic review and meta-analysis of RCTs to investigate the roles of MLT in improving QoL and symptoms in patients with cancer.

## Materials and methods

## Search strategy

A thorough search was conducted in the Cochrane Library, PubMed, Embase, Web of Science, Medline, CINAHL, Scopus, ClinicalTrials.gov, and China Biology Medicine (CBM) from inception through November 2021 for RCTs without language restrictions. Sources of unpublished studies and grey literature were searched through ProQuest and Open Grey. We used medical subject headings (MeSH) and text words to search the studies. The search strategies are provided in supplemental file 1.

## Eligibility criteria

### Participants

Studies including adult patients ( $\geq 18$  years) who were diagnosed with cancer according to National Cancer Institute codes, regardless of cancer type, cancer stage (early, middle or advanced), and current treatment (such as radiation therapy, chemotherapy, surgery, targeted therapy, immunotherapy, combination of any of the above treatments, or without any treatment), were eligible.

### Interventions and controls

All trials that reported and evaluated the effects of MLT were included. Literature were excluded if they met the following criteria: (1) they were not RCTs; (2) studied the effects of MLT along with other interventions; and (3) incomplete or absent outcome data.

### Outcomes

The primary outcome was QoL. The scores of sleep quality, fatigue, depression, and pain, stomatitis rate and stomatitis severity were the secondary outcomes.

### Studies

Only RCTs were eligible.

### Data extraction

Two independent researchers (SiyuYang, Tongyu Wang) extracted the data of eligible studies and performed double-checks. Any disagreements and differences were resolved by a third investigator

(Xiaofan Bu). The following data from the full text of selected studies were extracted: first author's name, year of publication, the characteristics of the patients, the characteristics of the intervention and the control groups (study design, form of intervention, dose of melatonin supplementation, duration), number of participants in each group and outcome data (means and standard deviations for continuous data; number of incidents for dichotomous data).

### **Risk of bias assessment**

Two reviewers (Yan Tan, Hongyun Chen) independently evaluated the risk of bias for each eligible study using the Cochrane assessment tool, which consists of the following seven domains: "random sequence generation, allocation concealment, blinding of participants and personnel, blinding of outcome assessment, incomplete outcome data, selective reporting, and other bias". Each question can be rated as follows: yes (+), low risk of bias; unclear (?), unclear risk of bias; no (-), high risk of bias. Any disagreement between the reviewers was resolved by discussion until consensus was reached.

### **Data analysis**

The meta-analysis was performed using Review Manager Software (version 5.3). The scores of QoL and symptoms was estimated by the mean difference (MD) when trials measured an outcome using the same measurement method or scale. We used the standard mean difference (SMD) when different instruments were used to measure the same outcome. For dichotomous outcomes (such as stomatitis rate and stomatitis severity), we used relative risk (RR). The effect size (ES) and the 95% confidence interval (CI) were computed. ESs with scores of 0.2–0.5, 0.5–0.8, and > 0.8 were considered as small, medium, and large effects, respectively. Forest plots were used to display the pooled ES, 95% CI, weight in percentage. If variability was presented by measures other than the mean or SD, we used standard approaches for estimating data. If the studies did not report SD, we used the following formula to calculate missing SD:  $SD = \sqrt{N \times (\text{upper } 95\% \text{ CI} - \text{lower } 95\% \text{ CI}) / 3.92}$ . If a study provided medians and interquartile ranges (IQRs), we transformed the median and IQR to the mean and SD by a method for nonnormal data.<sup>21</sup>  $I^2$  was used to measure the statistical heterogeneity among the trials in each analysis. If  $P > 0.1$  and  $I^2 < 50\%$ , a fixed-effects model was adopted; if  $P < 0.1$  and  $I^2 \geq 50\%$ , then a random-effects model was adopted. If heterogeneity was identified, subgroup analyses were conducted on different cancer types, treatments, dosages and durations. Sensitivity analysis was performed by removing studies with a high or unclear risk of bias. Reporting and publication bias were investigated by visually examining the degree of asymmetry of a funnel plot.

## Patient and public involvement

No patients were involved.

## Results

### Literature search

The initial search identified 1670 publications through PubMed, Embase, Medline, Scopus, SinoMed, Web of Science, Cochrane, and Clinical Trials. After excluding 501 duplicates, a total of 1161 studies were retrieved for title and abstract screening. After screening the titles and abstracts, 1111 articles were excluded, and 50 papers were retrieved for full text review. Out of 50 retrieved papers, 1 article was excluded due to wrong languages,<sup>22</sup> 6 articles were excluded without complete data, 14 articles were excluded without full text, 9 articles were excluded without target outcome, and 1 article was excluded due to a non-RCT study.<sup>23</sup> Therefore, a total of 19 articles were included in the final meta-analysis.<sup>24-42</sup> The flow chart of the literature search is shown in Fig. 1.

### Quality assessment

We used the Cochrane scoring system to assess the quality of the included studies. Two reviewers had different opinions on bias in one article in “incomplete outcome data”, and one article in “selective reporting”. Through the discussion, final consensus was achieved. The overall risk of bias as shown was moderate (Fig. 2). Nearly all studies reported appropriate random sequence generation. Most studies reported completed data and had low risk of bias on the item ‘Selective reporting’. Almost one-third of the studies did not report blindness in the outcome assessment. The individual risk of bias for each study is presented in Fig. 3.

### Literature characteristics

The characteristics of the patients, interventions, controls, and measures are shown in Table 1.

**Table 1 The characteristics of the literature**

| Author | Year | Population | Mean age<br>(interve | Study<br>design | Time of duration | Administration<br>time | Intervention<br>group | Control<br>group | Outcome | Intervention<br>(N) | Control<br>(N) |
|--------|------|------------|----------------------|-----------------|------------------|------------------------|-----------------------|------------------|---------|---------------------|----------------|
|--------|------|------------|----------------------|-----------------|------------------|------------------------|-----------------------|------------------|---------|---------------------|----------------|

|                               |      |                                                                                    | ntion/<br>control) |      |                                                                                                    |                            |                                                                |                                  |                                                                               |     |     |
|-------------------------------|------|------------------------------------------------------------------------------------|--------------------|------|----------------------------------------------------------------------------------------------------|----------------------------|----------------------------------------------------------------|----------------------------------|-------------------------------------------------------------------------------|-----|-----|
| P. Lissoni <sup>31</sup>      | 1997 | Patients with metastatic solid tumors under chemotherapy                           | 61/58              | RCTs | Every day without a break until disease progression                                                | Every night                | 20 mg oral MLT                                                 | Placebo                          | Stomatitis rate                                                               | 39  | 40  |
| P. Lissoni <sup>30</sup>      | 1999 | Patients with metastatic solid tumour under chemotherapy                           | 53/56              | RCTs | 7 days prior to chemotherapy, continued after chemotherapy interruption, until disease progression | Every night                | 20 mg oral MLT                                                 | Placebo                          | Stomatitis rate                                                               | 124 | 126 |
| P. Lissoni <sup>29</sup>      | 2002 | Untreated patients with metastatic solid tumors under chemotherapy                 | 66/65              | RCTs | At least 2 months                                                                                  | Every night                | 20 mg oral MLT plus support care                               | Placebo plus support care        | Stomatitis rate                                                               | 98  | 102 |
| Hansen <sup>27</sup>          | 2014 | Patients undergoing breast cancer surgery                                          | 51/60              | RCTs | 10days: 2 days preoperatively till 8 days postoperatively                                          | One hour before bedtime    | 6 mg oral MLT                                                  | Placebo                          | Depression (MDI), Sleepiness (KSS, VAS), Fatigue (VAS), Pain (VAS)            | 28  | 26  |
| Chen <sup>24</sup>            | 2014 | Breast cancer survivors                                                            | 59/59              | RCTs | 4 months                                                                                           | Each night at 9 pm         | 3 mg oral MLT                                                  | Placebo                          | Sleep (PSQI), depression (CES-D)                                              | 48  | 47  |
| Sookprasert <sup>41</sup>     | 2014 | Patients with non-small cell lung cancer receiving chemotherapy                    | 56.8/55.6          | RCTs | 2 months: during chemotherapy                                                                      | At night after 21:00       | 10 mg or 20mg oral MLT                                         | Placebo                          | QOL(FACT-L), Mucositis rate                                                   | 88  | 38  |
| Rasmussen <sup>33</sup>       | 2015 | Advanced cancer patients who reported significantly tired in palliative care unit  | 64/65              | RCTs | 7 days                                                                                             | Every night                | 20 mg oral MLT                                                 | Placebo                          | Fatigue (MFI-20), QOL (EORTC QLQ-C15-PAL), Insomnia (EORTC QLQ-C15-PAL)       | 21  | 23  |
| Madsen <sup>34</sup>          | 2016 | Patients undergoing breast cancer surgery                                          | 51/59              | RCTs | 2weeks: 3 days preoperatively until 2 weeks postoperatively                                        | One hour before bedtime    | 6 mg oral MLT                                                  | Placebo                          | Sleep (VAS, KSS), pain (VAS)                                                  | 27  | 21  |
| Kurdi <sup>28</sup>           | 2016 | Cancer Patients with Insomnia                                                      | 55.2/49.64         | RCTs | 14 days                                                                                            | At 7 pm                    | 3mg oral MLT                                                   | Placebo                          | Sleep (AIS)                                                                   | 25  | 25  |
| Onseng <sup>35</sup>          | 2017 | Patients with head and neck cancer receiving concurrent chemoradiation             | 47.3/49.6          | RCTs | 35days: 5 days a week throughout the 7 weeks of chemoradiation                                     | At night after 21:00       | 10 mL of a 0.2% MLT niosome oral gargle plus 20 mg oral dosage | placebo                          | QOL (FACT—H&N), Mucositis rate, Mucositis severity (WHO-G)                    | 19  | 20  |
| Elsabagh H H <sup>25</sup>    | 2019 | Patients with head and neck cancer undergoing radiotherapy                         | 57.8/55.9          | RCTs | Six weeks                                                                                          | 30 minutes before sleeping | 20 mg oral MLT                                                 | Placebo                          | Stomatitis severity (WHO-G), Stomatitis rate, Pain (NRS)                      | 20  | 20  |
| Palmer <sup>36</sup>          | 2019 | Patients with breast cancer receiving chemotherapy                                 | 54.24/54.11        | RCTs | 10 days during treatment.                                                                          | One hour before bedtime    | 20 mg oral MLT                                                 | Placebo                          | Pain (NRS), Sleep (PSQI), Depression (BDI)                                    | 18  | 18  |
| Yennurajalingam <sup>42</sup> | 2019 | Patients with advanced cancer with poor sleep quality                              | Not clearly        | RCTs | 14d                                                                                                | At bedtime                 | 20mg oral MLT plus bright white light therapy                  | Bright white light therapy alone | Sleep (PSQI), insomnia (ISI), fatigue (FACIT-F), depression (HADS), QOL(FACT) | 6   | 8   |
| Palmer <sup>37</sup>          | 2020 | Patients with breast cancer undergoing chemotherapy after lumpectomy or mastectomy | 54.24/54.11        | RCTs | 10 days: three days prior to chemotherapy and seven following days                                 | One hour before bedtime    | 20 mg oral MLT                                                 | Placebo                          | Depressive symptoms (BDI-II), Sleep quality (PSQI), QOL (EORTC QLQ-C30)       | 18  | 18  |



|                        |      |                                                                                        |             |      |                                                                          |                         |                                                                    |                                                            |                                                                              |     |     |
|------------------------|------|----------------------------------------------------------------------------------------|-------------|------|--------------------------------------------------------------------------|-------------------------|--------------------------------------------------------------------|------------------------------------------------------------|------------------------------------------------------------------------------|-----|-----|
| Pashaki <sup>38</sup>  | 2021 | Patients with breast cancer during adjuvant chemotherapy and radiotherapy              | 50.47/46.05 | RCTs | 8weeks: from 1 week before until 1 month after the adjuvant radiotherapy | One hour before bedtime | 18 mg oral MLT                                                     | Placebo                                                    | Fatigue (BFI)                                                                | 38  | 36  |
| Seely <sup>39</sup>    | 2021 | Cancer patients following lung cancer resection                                        | 67.2/67.2   | RCTs | One year after surgery                                                   | One hour before bedtime | 20 mg oral MLT                                                     | Placebo                                                    | Fatigue (MFI-20), QOL(QLQ-LC13), Sleep (MOS), Depression (BDI 2), Pain (BPI) | 356 | 353 |
| Shahroki <sup>40</sup> | 2021 | Patients with colorectal cancer undergoing chemotherapy with sleep disorder            | 63.63/64.11 | RCTs | 4week of treatment                                                       | At bedtime              | 6 mg oral MLT                                                      | 10 mg zolpidem                                             | Sleep (GSQS, PSQI), Depression (HRSD)                                        | 45  | 45  |
| Grutsch <sup>26</sup>  | 2021 | NSCLC patients under chemotherapy                                                      | 60.3/63     | RCTs | From intervention to death                                               | At 8am or at 8pm        | 20 mg oral MLT                                                     | Placebo                                                    | QOL(QLQ-C30), Fatigue (QLQ-C30), Pain (QLQ-C30), Sleep (PSQI)                | 20  | 18  |
| Borbalas <sup>32</sup> | 2021 | Patients with head and neck cancer undergoing radiation therapy and chemical treatment | 59/56       | RCTs | 5days a week, lasting 7 weeks                                            | Not clearly             | 3% oral MLT gel plus standard symptomatic treatment for stomatitis | Placebo plus standard symptomatic treatment for stomatitis | Stomatitis severity (WHO-G), Stomatitis rate                                 | 40  | 39  |

N, number; Randomized controlled trials, RCTs; Melatonin, MLT; BDI-II, Beck Depression Inventory; PSQI, Pittsburgh Sleep Quality Index; EORTC QLQ-C30, European Organization for Cancer Research and Treatment of Cancer Quality of Life Questionnaire; MFI-20, Multidimensional Fatigue Inventory; EORTC QLQ-C15-PAL, European Organization for Research and Treatment of Cancer Quality of Life Questionnaire Core 15 Palliative Version; CES-D, Center for Epidemiologic Studies-Depression; BFI: Brief Fatigue Inventory; VAS, Visual Analogue Scale; KSS, Karolinska Sleepiness Scale; MDI, Major Depression Inventory; FACT—H&N, Functional Assessment of Cancer Therapy—H&N Version 4; FACT-L, Functional Assessment of Cancer Therapy – Lung; QLQ-LC13, Lung Cancer-13 modules; BDI 2, Beck Depression Inventory 2; MOS, Medical Outcomes Study Sleep Survey; BPI, Brief Pain Inventory; GSQS, Sleep Quality Scale; HRSD, Hamilton Rating Scale for Depression; NRS, Numeric Rating Scales; ISI, Insomnia Severity Index; FACIT-F, Functional Assessment of Cancer Illness Therapy-Fatigue subscale; HADS, Hospital Anxiety and Depression Scale; FACT, Functional Assessment of Cancer Illness Therapy; AIS, Athens insomnia scale; WHO-G, WHO grading system

## Participants

The publication dates ranged from 1997 to 2021. Among the 19 studies included in the systematic review, the mean age of the participants ranged from 46.05 to 67.2. The sample size ranged from 14 to 709 participants. Regarding treatment trajectory, 12 studies were conducted in cancer patients with adjuvant chemotherapy and/or radiotherapy,<sup>25 26 29-32 35-38 40 41</sup> 1 was in advanced cancer patients with fatigue,<sup>33</sup> 1 was in breast cancer survivors,<sup>24</sup> 3 were in cancer patients with surgery,<sup>27 34 39</sup> and 2 were in advanced cancer patients with poor sleep quality.<sup>28 42</sup> Regarding cancer diagnosis, 6 studies were in breast cancer,<sup>24 27 34 36-38</sup> 2 were in non-small-cell lung cancer,<sup>26 39</sup> 3 were in head and neck cancer,<sup>25 32 35</sup> 1 was in colorectal cancer,<sup>40</sup> and 7 studies were not restricted to cancer type but were mostly in advanced cancer patients.<sup>28-31 33 41 42</sup>

## Intervention

The follow-up period ranged from seven days to one year. The MLT dosage varied between 3 and 20 mg. Regarding the types of MLT administration, 17 involved oral MLT,<sup>24-31 33 34 36-42</sup> 1 involved MLT oral gargle,<sup>32</sup> and 1 was combined.<sup>35</sup> Nearly all studies gave the MLT at night, except one which compared dosage given both in the morning and at night<sup>26</sup>.

## Instruments

All studies used standardized and validated tools. QoL was measured by four validated tools: the European Organization for Cancer Research (EORTC QLQ-C30),<sup>26 37</sup> Treatment validated for the Brazilian population (QLQ-BR 23),<sup>37</sup> Functional Assessment of Cancer Therapy (FACT),<sup>41 42</sup> Ferrans and Powers Quality of Life Index (QLI)<sup>26</sup>, European Organization for Research and Treatment of Cancer Quality of Life Questionnaire Core 15 Palliative Version (EORTC QLQ-C15-PAL),<sup>33</sup> and Lung Cancer-13 (QLQ-LC13).<sup>39</sup> Sleep quality was measured by the Pittsburgh Sleep Quality Index (PSQI),<sup>24 26 36 37 40 42</sup> Visual Analogue Scale (VAS),<sup>27 34</sup> Karolinska Sleepiness Scale (KSS),<sup>27 34</sup> Sleep Quality Scale (GSQS),<sup>40</sup> Athens insomnia scale,<sup>28</sup> and Medical Outcomes Study (MOS) Sleep Survey.<sup>39</sup> Depression was measured by the Beck Depression Inventory (BDI-II),<sup>37 39</sup> Beck Depression Inventory (BDI),<sup>36</sup> Center for Epidemiologic Studies-Depression (CES-D),<sup>24</sup> Major Depression Inventory (MDI),<sup>27</sup> Hamilton Rating Scale for Depression (HRSD),<sup>40</sup> Hospital Anxiety and Depression Scale (HADS).<sup>42</sup> Fatigue was measured by the Multidimensional Fatigue Inventory (MFI-20),<sup>33</sup> EORTC QLQ-C15-PAL (fatigue domain),<sup>33</sup> Brief Fatigue Inventory (BFI),<sup>38</sup> VAS,<sup>27</sup> Multidimensional Fatigue Index 20 questionnaire,<sup>39</sup> QLQ-C30 (fatigue domain),<sup>26</sup> and Functional Assessment of Cancer Illness Therapy-Fatigue subscale (FACIT-F).<sup>42</sup> Pain was measured by VAS,<sup>27 34</sup> Brief Pain Inventory (BPI),<sup>39</sup> QLQ-C30 (pain domain),<sup>26</sup> and Numeric Rating Scales (NRS).<sup>25 36</sup> The incidence of stomatitis was calculated by the ratio of the occurrence number to the total number.<sup>25 29-32 35 41</sup>

## Meta-analysis

### Effect of MLT on QoL

Overall, 6 clinical trials evaluated the effect of MLT on QOL. The results showed that there was no statistically significant difference between the intervention and control groups [SMD = -0.01, 95% CI (-0.14, 0.11), P = 0.83] with no heterogeneity ( $I^2=0\%$ ,  $P=0.42$ ) (Fig. 4). All 6 studies used a 20mg MLT dosage. Subgroup analysis based on study durations ( $P=0.65-0.92$ ) and treatment types ( $P=0.45-0.6$ ) showed no significant differences.

### Effect of MLT on sleep quality

Nine clinical trials evaluated the effect of MLT on sleep quality. Pooled ES from the random effect model showed that there was no significant effect on sleep quality [SMD = -0.18, 95% CI (-0.62, 0.26), P = 0.42] (Fig. 5). There was significant heterogeneity between studies ( $I^2 = 87\%$ ,  $P < 0.001$ ). We deleted a study<sup>40</sup> with obvious heterogeneity and  $I^2$  decreased to 79% [SMD = -0.35, 95% CI (-0.73, 0.03), P = 0.07]. Subgroup analysis based on dosage, study durations, treatments, different

combinations of dosage and duration showed no significant differences between subgroups (Table 2).

**Table 2 Subgroup analyses of melatonin supplementation on sleep quality**

|                           | N | WMD (95% CI)         | Heterogeneity I <sup>2</sup> (P) | P within group |
|---------------------------|---|----------------------|----------------------------------|----------------|
| <b>Overall effect</b>     | 8 | -0.35 (-0.73, 0.03)  | 79% (P<0.0001)                   | 0.07           |
| <b>Dosage</b>             |   |                      |                                  |                |
| <10mg                     | 4 | -0.32 (-0.88, 0.23)  | 77% (P=0.005)                    | 0.25           |
| ≥10mg                     | 4 | -0.42 (-1.16, 0.32)  | 84% (P=0.0004)                   | 0.27           |
| <b>Duration</b>           |   |                      |                                  |                |
| <2 weeks                  | 2 | -0.01 (-0.33, 0.32)  | 0% (p=0.76)                      | 0.96           |
| ≥2 weeks                  | 6 | -0.51 (-1.07, 0.05)  | 85% (p<0.00001)                  | 0.08           |
| <b>Combination</b>        |   |                      |                                  |                |
| <10mg + ≥2 weeks          | 3 | -0.46 (-1.18, 0.27)  | 83% (P=0.003)                    | 0.22           |
| >10mg + ≥2 weeks          | 3 | -0.01 (-0.16, 0.13)  | 0% (P=1.00)                      | 0.86           |
| >10mg + <2 weeks          | 1 | -1.75 (-2.54, -0.97) | -                                | <0.01          |
| <10mg + <2 weeks          | 1 | 0.06 (-0.5, 0.62)    | -                                | 0.83           |
| <b>Combined treatment</b> |   |                      |                                  |                |
| <b>Under chemotherapy</b> | 2 | -0.87 (-2.57, 0.82)  | 91% (P=0.0009)                   | 0.31           |
| <b>Under surgery</b>      | 3 | -0.02 (-0.15, 0.12)  | 0% (P=0.89)                      | 0.83           |
| <b>With insomnia</b>      |   |                      |                                  |                |
| <b>Yes</b>                | 2 | -0.7 (-1.96, 0.57)   | 77% (P=0.04)                     | 0.28           |
| <b>No</b>                 | 6 | -0.23 (-0.58, 0.13)  | 73% (P=0.002)                    | 0.21           |

N, number of the literatures

### Effect of MLT on fatigue

The overall ES of MLT for fatigue alleviation was medium [SMD = -0.34, 95% CI (-0.73, 0.06), P = 0.10] with high heterogeneity (P = 0.002, I<sup>2</sup> = 74%). However, there was no significant difference. The study of Pashaki et al,<sup>38</sup> showed great heterogeneity because only this one proved a significantly lower level of fatigue in the intervention group. We removed it, and the heterogeneity decreased to 0% (Fig. 6).

### Effect of MLT on depression

Six clinical trials evaluated the effect of MLT on depression. Only Palmer et al, showed a significant effect on depression.<sup>37</sup> The overall treatment effect on depression showed that there was no statistically significant difference between the intervention and control groups [SMD = -0.24, 95% CI (-0.53, 0.05), P = 0.10] with high heterogeneity (P = 0.03, I<sup>2</sup> = 60%). A sensitivity analysis was performed by removing one study from the analysis (Fig. 7).<sup>37</sup> Regarding subgroup analysis, a significant difference was observed for different study durations and treatments, although both showed a slight ES. Patients who received an intervention duration greater than 14 days had significantly lower depression [SMD = -0.14, 95% CI (-0.27, -0.01), P = 0.03] with low heterogeneity (P = 0.4, I<sup>2</sup> = 0%) (Fig. 8). Meanwhile, MLT alleviated depression in cancer patients who underwent surgery [SMD = -0.17, 95% CI (-0.32, -0.03), P = 0.02] with low heterogeneity (P = 0.35, I<sup>2</sup> = 0%) compared to those received chemotherapy (Fig. 9). No significant difference was observed among studies on the different dosages (P = 0.27-0.43), cancer diagnosis (P = 0.20), and combined chemotherapy (P = 0.13-0.42).

### Effect of MLT on pain

Five clinical trials evaluated the effect of MLT on pain [SMD = -0.34, 95% CI (-0.7, 0.02), P = 0.06] with high heterogeneity among studies (P = 0.03, I<sup>2</sup> = 62%). No significant difference was observed among studies on the cancer diagnosis (P = 0.27-0.47), combined treatments (P = 0.37), durations (P = 0.11) and dosages (P = 0.16-0.27). Sensitivity analysis was performed by removing one study<sup>25</sup>, and the heterogeneity decreased to 0% (Fig. 10).

### Effect of MLT on stomatitis

1  
2  
3  
4 Regarding stomatitis, seven clinical trials evaluated the effect of MLT on the incidence of stomatitis.  
5 The finding showed that there was no significant ES [RR = 0.71, 95% CI (0.45, 1.13), P = 0.15]  
6 (Fig. 11), with high heterogeneity (P < 0.001, I<sup>2</sup> = 86%). All of the study durations were more than  
7 2 weeks, and all patients accepted chemotherapy or radiotherapy. In addition, nearly all these  
8 clinical trials gave an MLT of 20 mg, except one that used a 3% MLT oral gel.<sup>32</sup> However, removing  
9 it or not caused little change to heterogeneity and ES. Further subgroup analysis showed that the  
10 cancer type might be the main source of heterogeneity. MLT did not reduce the incidence of  
11 stomatitis among patients with head and neck cancer under adjuvant chemotherapy or radiotherapy  
12 [RR = 1.09, 95% CI (0.92, 1.29), P = 0.35], with low heterogeneity (P = 0.64, I<sup>2</sup> = 0%). However, it  
13 had significant value in patients with other kinds of tumours except head and neck cancer [RR = 0.47,  
14 95% CI (0.26, 0.88), P = 0.02] with high heterogeneity (P = 0.03, I<sup>2</sup> = 66%) (Fig. 12).  
15  
16  
17  
18  
19

20  
21 For stomatitis severity, three clinical trials evaluated the effect of MLT on reducing 3-4 grade  
22 (severe) stomatitis according to the WHO grading system.<sup>43</sup> The overall treatment effect showed  
23 that the intervention had no statistically significant difference between the intervention and control  
24 groups [RR = 0.78, 95% CI (0.47, 1.30), P = 0.35] with low heterogeneity (P = 0.22, I<sup>2</sup> = 35%)  
25 (Fig. 13).  
26  
27  
28  
29  
30

### 31 Discussion

32  
33 To the best of our knowledge, this study is the first meta-analysis to investigate the effect of MLT  
34 on QoL, sleep quality, and other symptoms, such as fatigue, depression, pain and stomatitis, in  
35 cancer patients. Unfortunately, in the current study, we did not prove the beneficial effect of MLT  
36 on QoL, sleep quality, fatigue or pain. However, it has the potential to improve depression and  
37 reduce the incidence of stomatitis with small ESs.  
38  
39  
40

41  
42 Most of the suffering that cancer patients now face comes from disturbing symptoms, such as  
43 poor sleep, fatigue, depression, pain and so on. Effective symptom control greatly improves QoL.  
44 Thus, the effect of MLT on QoL might be achieved through relieving symptoms. Innominato et al,  
45 revealed that bedtime MLT was associated with a significant improvement in sleep quality, fatigue  
46 severity, QoL, and social and cognitive function in advanced breast cancer patients.<sup>44</sup> However,  
47 contradictory conclusions revealed that MLT did not improve appetite, weight, or QoL in cachectic  
48 patients with advanced cancer.<sup>45</sup> In addition, a previous study reported beneficial short-term effects  
49 of MLT on sleep but not QoL.<sup>46</sup> Our review included six trials that regarded the QoL of cancer  
50 patients as a health outcome. None of them proved a significant improvement in QoL in the  
51 intervention group, although Grutsch et al,<sup>26</sup> and Sookprasert et al,<sup>41</sup> provided a trend for better QoL  
52 compared with baseline. For such invalid effectiveness, one of the possible interpretations might be  
53 the differences due to the study population, interventions and measurements. Another explanation  
54  
55  
56  
57  
58  
59  
60

1  
2  
3 might be the multidimensional properties of QoL, which contained domains of physical, psychology,  
4 spirit, and social. Thus, the mere elimination of symptoms played a limited role in improving the  
5 QoL, especially for cancer patients who were faced with many other disturbing aspects.  
6  
7

8  
9 Due to the important role in regulating the circadian rhythm and sleep, many studies have been  
10 conducted to verify the value of MLT on sleep. MLT may be preferable to traditional hypnotics in  
11 the management of insomnia.<sup>47</sup> A network meta-analysis supports the effectiveness of MLT in  
12 improving sleep-onset difficulties.<sup>48</sup> A review of the influence of dietary sources of MLT on sleep  
13 quality indicated that the sources of MLT consumption of milk and sour cherries may improve sleep  
14 quality.<sup>49</sup> There are many conflicting studies regarding different populations, dosages and durations.  
15 Fatemeh et al, found the significant effects of MLT on sleep quality in patients with respiratory  
16 diseases, metabolic disorders, and sleep disorders but not in mental disorders, neurodegenerative  
17 diseases and breast cancer.<sup>50</sup> Under the condition of using the Pittsburgh Sleep Quality Index as a  
18 unified measurement tool, 20mg MLT for 10 days in breast cancer patients under chemotherapy  
19 showed a positive sleeping improvement,<sup>37</sup> while the same dosage for at least 28 days revealed a  
20 meaningless result in patients with lung cancer.<sup>51</sup> Meanwhile, the optimal combination of dosage  
21 and duration remains unknown. Innominato et al, found that 5mg for two months has a positive  
22 effect on sleep quality and QoL in advanced breast cancer patients.<sup>44</sup> Similarly, in advanced cancer  
23 patients, the combination of 14-Day 20 mg MLT plus bright white light therapy did not improve  
24 sleep quality.<sup>42</sup> Under fewer doses, 14-Day 3mg MLT actually improved sleep in cancer patients  
25 with insomnia.<sup>28</sup> Our review revealed that MLT could not improve sleep. The subgroup analysis did  
26 not find a significant difference in different MLT durations, dosages, or combinations of dosage and  
27 duration. The optimal combination of dosage and duration in improving sleep for patients warrants  
28 further exploration. The administration type is another factor. It was found that a 2 mg prolonged  
29 release MLT formulation for 14 days resulted in significant and clinically meaningful improvements  
30 in sleep quality, morning alertness, and sleep onset latency in primary insomnia patients<sup>52</sup> and in  
31 Parkinson's disease patients with a poor sleep quality.<sup>53</sup> However, most of the studies we included  
32 used oral MLT. How the administration type affects effect on sleep in cancer patients remains to be  
33 studied. The effectiveness of the combination of bright light and MLT remains controversial.  
34 Yennurajalingam et al, proved that it could not work in advanced cancer patients with insomnia,<sup>42</sup>  
35 while it could improve subjective daytime sleepiness in patients with delayed sleep phase disorder.<sup>54</sup>  
36  
37  
38  
39  
40  
41  
42  
43  
44  
45  
46  
47  
48  
49

50 MLT may be an effective treatment for patients with chronic fatigue syndrome.<sup>55</sup> Nevertheless,  
51 in the current study, none of the studies showed any improvement in fatigue in cancer patients. Only  
52 a high-quality trial proved a significant effect of MLT on breast cancer patients undergoing adjuvant  
53 chemotherapy and radiotherapy,<sup>38</sup> with MLT doses of 18 mg a day from 1 week before until 1 month  
54 after adjuvant radiotherapy. The evidence supporting the usage of melatonin for cancer-related  
55 fatigue is limited. Short-term use of dexamethasone or methylprednisolone is recommended for the  
56  
57  
58  
59  
60

control of cancer-related fatigue (CRF) in metastatic cancer patients according to European Society for Medical Oncology (ESMO) guidelines,<sup>56</sup> while the use of eszopiclone, megestrol acetate and MLT is not recommended for the control of CRF. However, the preventive effect of MLT on cancer-related fatigue is still under study. Nonpharmaceutical interventions were also recommended,<sup>56</sup> such as relaxation exercise, massage, cognitive-behavioural therapy, and physical activity, which were demonstrated to have moderate-to-large ESs.<sup>57</sup> Multimodal therapy, qigong, aerobic exercise, and cognitive-behavioural therapy might be the best choices for cancer-related fatigue.<sup>58</sup>

MLT seems to be able to ease pain. However, the results have varied in different studies. Lee et al, found that the prophylactic administration of MLT conferred significant clinical benefits in reducing postoperative pain and opioid use, as well as improved sensory recovery following orthognathic surgery.<sup>59</sup> Tunay et al, found that preoperative oral MLT led to a reduction in pain scores, total morphine consumption and supplemental analgesic requirements after surgery.<sup>60</sup> MLT could also improve pain in females with primary dysmenorrhea.<sup>61</sup> However, the evidence was limited in critically ill patients in the ICU and patients after total knee arthroplasty.<sup>62 63</sup> For cancer patients, the evidence is also restricted. Our review revealed that MLT had no effect on pain relief. Only Elsabagh et al, found a beneficial effect of MLT on alleviating pain in head and neck cancer patients undergoing radiotherapy, with a dosage of 20 mg for six weeks.<sup>25</sup> At the same time, Palme et al, found a drop in pain scores from baseline in the intervention group.<sup>36</sup> The minor role of MLT on pain in cancer patients could be explained by the fact that cancer-related pain is one of the most common and troublesome symptoms affecting cancer patients with high severity.<sup>64</sup> For such sever pain, effective analgesics, such as opioids, are more helpful. In addition, despite the availability of effective treatments, cancer-related pain may be inadequately controlled in up to 50% of patients. Thus, multidisciplinary interventions are required<sup>65</sup>, and single MLT seems too weak for cancer pain.

Circadian rhythm disruption underlies the pathophysiology of psychiatric disorders, especially depression.<sup>6</sup> MLT is a pleiotropic regulator molecule, and its analogues have been observed to resynchronize the circadian rhythm and to alleviate depressive symptoms.<sup>66</sup> However, duration and treatment might affect the antidepressant effects of MLT, and both showed a slight ES. We found that MLT supplementation had a significant effect in patients who received more than 14 days of treatments and those who underwent surgery. Our assumption is that patients under operation tend to be in the early stages of the disease with lighter disease load and slight depression. The antidepressant effect of a long MLT duration in patients with less serious disease was shown in some studies. For example, MLT for 12 weeks had beneficial effects on decreasing depression in women with polycystic ovary syndrome,<sup>67</sup> patients with Parkinson's disease<sup>68</sup> and diabetic haemodialysis patients.<sup>69</sup> Nevertheless, it had no prophylactic antidepressant effect on acute coronary syndrome<sup>70</sup> or patients with acute mania.<sup>71</sup>



1  
2  
3  
4  
5  
6  
7  
8  
9  
10  
11  
12  
13  
14  
15  
16  
17  
18  
19  
20  
21  
22  
23  
24  
25  
26  
27  
28  
29  
30  
31  
32  
33  
34  
35  
36  
37  
38  
39  
40  
41  
42  
43  
44  
45  
46  
47  
48  
49  
50  
51  
52  
53  
54  
55  
56  
57  
58  
59  
60

Oral mucositis refers to inflammation and ulceration of the oral mucosa, which is a frequent side effect of cancer therapy.<sup>72</sup> Stomatitis, especially the grade 3 or 4 mucositis<sup>73</sup>, can hamper oral nutrition, resulting in malnutrition, reduce QoL, and introduce the need for dose reductions and interruption of chemotherapy.<sup>74</sup> MLT has potential direct antitumor activity and has been proven to modulate the effects of cancer chemotherapy by enhancing therapeutic efficacy and reducing toxicity.<sup>75</sup> Our review showed that MLT had no effect on mucositis. Further subgroup analysis showed that the cancer type was the major source of heterogeneity. MLT could not reduce the stomatitis rate among head and neck cancer patients, while it had a slightly significant effect in patients with other tumours. Among the studies conducted in head and neck cancer patients, Borbala et al, found that oral MLT gel demonstrated a consistent trend in lowering incidence and shortening mucositis duration.<sup>32</sup> Onseong et al, revealed that adjuvant MLT delayed the onset of oral mucositis.<sup>35</sup> ElSabagh et al, found that MLT reduced severe oral mucositis development.<sup>25</sup> None of them proved that MLT could reduce the incidence of stomatitis. The possible interpretation was the significant toxicity of systemic high doses of chemotherapy and radiotherapy for head and neck cancer.<sup>76</sup> Compared to other cancer patients who only received chemotherapy or radiotherapy, most head and neck cancer patients received the combined chemoradiotherapy. In addition, radiation in the head and neck increases the odds of stomatitis occurrence. We also found that in the MLT group, the reported incidence of stomatitis was higher in head and neck cancer patients (52.5%-90%) than in other cancer populations (5.12%-24%). Moreover, our review revealed that MLT could not reduce the severity of stomatitis. A meta-analysis showed that probiotics might reduce the incidence and mitigate the severity of cancer therapy-induced mucositis.<sup>77</sup> Additionally, photobiomodulation (PBM) was recommended for the prevention of mucositis.<sup>78 79</sup> However, how they affect patients with head and neck cancer under chemoradiotherapy is still unknown.

### Strengths and limitations

To the best of our knowledge, this study is the first meta-analysis to investigate the effect of MLT on QoL and symptoms in cancer patients. Eleven databases were widely searched for eligible studies. Risk of bias analysis was conducted independently by two reviewers using the validated Cochrane assessment tool. The trial quality was generally moderate, with most studies having a low risk of bias, which could further lend confidence to the current pooled results. In the subgroup analysis, we also widely explored the effectiveness of MLT in different populations, treatments, dosages, and durations. There are some limitations. The first is the insufficient literature. We reviewed many aspects of MLT, such as QoL, sleep, fatigue, depression, pain and stomatitis. A total of 19 articles were included in the final meta-analysis. However, for every dimension, the literature is limited, from only 5-9. This is mostly the result of the lack of RCTs of MLT in cancer patients. Thus, insufficient data were used for synthesis. There were 14 excluded articles without full text, which



limits the generality of the conclusion. Meanwhile, the assessment of publication bias was not allowed because no dimension had more than 10 references. Furthermore, the main significant results were from subgroup analysis, and the results should be interpreted prudently.

## Conclusion

Due to its nontoxic property and beneficial effects,<sup>80 81</sup> MLT is increasingly used as an adjuvant medicine in anticancer treatment. We included a moderate number of trials with varied populations and examined the effectiveness of MLT on cancer patients to provide evidence-based findings on using MLT in a real clinical setting. Our review showed that MLT did not improve QoL, sleep quality, fatigue, or pain among cancer patients. MLT has positive effects on decreasing the stomatitis incidence and depression, which may make it a reasonable option for stomatitis and depression prevention in the clinic. Even so, there are still many restrictions. Further large-scale RCTs are urgently needed. In addition, the effects of different combinations of MLT dosage and durations, administration types and joint measures are worthy of further study.

## Supplementary Material

Fig.1 Study flow diagram

Fig.2 The overall risk of bias

Fig.3 The individual risk of bias for each study

Fig.4 Forest plot of the effect of MLT on QoL among patients with cancer

Fig.5 Forest plot of the effect of MLT on sleep quality among patients with cancer

Fig.6 Forest plot of the effect of MLT on fatigue among patients with cancer

Fig.7 Forest plot of the effect of MLT on depression among patients with cancer

Fig.8 Forest plot of longer MLT duration on depression among patients with cancer

Fig.9 Forest plot of MLT on depression among cancer patients underwent surgery

Fig. 10 Forest plot of the effect of MLT on pain among patients with cancer

Fig. 11 Forest plot of the effect of MLT on stomatitis incidence among patients with cancer

Fig. 12 Forest plot of the effect of MLT on stomatitis incidence among cancer patients except head

1  
2  
3 and neck cancer  
4

5  
6 Fig. 13 Forest plot of the effect of MLT on stomatitis severity among patients with cancer  
7  
8  
9

#### 10 **Footnotes**

11  
12 **Funding:** The authors have not declared a specific grant for this research from any funding agency  
13 in the public, commercial or not-for-profit sectors.  
14  
15

16  
17  
18 **Conflicts of interest:** All the authors have declared that no competing interest exists.  
19  
20

21  
22  
23 **Provenance and peer review:** Not commissioned; externally peer reviewed.  
24  
25

26  
27  
28 **Supplemental material:** This content has been supplied by the author(s). It has not been vetted by  
29 BMJ Publishing Group Limited (BMJ) and may not have been peer-reviewed. Any opinions or  
30 recommendations discussed are solely those of the author(s) and are not endorsed by BMJ. BMJ  
31 disclaims all liability and responsibility arising from any reliance placed on the content. Where the  
32 content includes any translated material, BMJ does not warrant the accuracy and reliability of the  
33 translations (including but not limited to local regulations, clinical guidelines, terminology, drug  
34 names and drug dosages), and is not responsible for any error and/or omissions arising from  
35 translation and adaptation or otherwise.  
36  
37  
38  
39

#### 40 41 42 43 **Data availability statement:**

44  
45 All data relevant to the study are included in the article or uploaded as supplementary information.  
46 No additional data are available.  
47  
48  
49

#### 50 51 52 **Authors' contributions:**

53  
54 All authors had contributed to this study. Xuying Li and Rongrong Fan conceived and designed the  
55 original study protocol. Rongrong Fan and Xiaofan Bu performed literature search and and literature  
56 screening. Siyu Yang and Tongyu Wang takes responsibility for the integrity of the data and the  
57  
58  
59

1  
2  
3 data analysis. Xuying Li interpreted the results. Yan Tan and Hongyun Chen assessed the risk of  
4 bias of the studies. Rongrong Fan was responsible for writing the first draft of the paper and revision  
5 of the manuscript. Xuying Li is responsible for the overall content as guarantor. All authors  
6 ccritically reviewed and approved the final manuscript.  
7  
8  
9

### 10 11 12 **Ethics approval:**

13  
14 This is a meta-analysis. The Hunan Cancer Hospital Research Ethics Committee has confirmed that  
15 no ethical approval is required.  
16  
17

### 18 19 20 **Patient consent for publication:**

21  
22 Not applicable.  
23  
24  
25  
26  
27

### 28 29 **References**

- 30 1. Stacchiotti A, Favero G, Rodella LF. Impact of Melatonin on Skeletal Muscle and Exercise. *Cells* 2020;9(2) doi:  
31 10.3390/cells9020288 [published Online First: 2020/01/30]  
32
- 33 2. Mortezaee K, Majidpoor J, Daneshi E, et al. Post-treatment of melatonin with CCl(4) better reduces fibrogenic  
34 and oxidative changes in liver than melatonin co-treatment. *Journal of cellular biochemistry*  
35 2018;119(2):1716-25. doi: 10.1002/jcb.26331 [published Online First: 2017/08/08]  
36  
37
- 38 3. Mortezaee K, Pasbakhsh P, Ragerdi Kashani I, et al. Melatonin Pretreatment Enhances the Homing of Bone  
39 Marrow-derived Mesenchymal Stem Cells Following Transplantation in a Rat Model of Liver Fibrosis.  
40 *Iranian biomedical journal* 2016;20(4):207-16. doi: 10.7508/ibj.2016.04.004 [published Online First:  
41 2016/05/01]  
42  
43
- 44 4. Mortezaee K, Khanlarkhani N, Sabbaghziarani F, et al. Preconditioning with melatonin improves therapeutic  
45 outcomes of bone marrow-derived mesenchymal stem cells in targeting liver fibrosis induced by CCl4.  
46 *Cell and tissue research* 2017;369(2):303-12. doi: 10.1007/s00441-017-2604-1 [published Online First:  
47 2017/04/18]  
48  
49
- 50 5. Xie Z, Chen F, Li WA, et al. A review of sleep disorders and melatonin. *Neurological research* 2017;39(6):559-  
51 65. doi: 10.1080/01616412.2017.1315864 [published Online First: 2017/05/04]  
52  
53
- 54 6. Satyanarayanan SK, Su H, Lin YW, et al. Circadian Rhythm and Melatonin in the Treatment of Depression.  
55 *Current pharmaceutical design* 2018;24(22):2549-55. doi: 10.2174/1381612824666180803112304  
56  
57  
58  
59

[published Online First: 2018/08/04]

7. Maria S, Swanson MH, Enderby LT, et al. Melatonin-micronutrients Osteopenia Treatment Study (MOTS): a translational study assessing melatonin, strontium (citrate), vitamin D3 and vitamin K2 (MK7) on bone density, bone marker turnover and health related quality of life in postmenopausal osteopenic women following a one-year double-blind RCT and on osteoblast-osteoclast co-cultures. *Aging* 2017;9(1):256-85. doi: 10.18632/aging.101158 [published Online First: 2017/01/29]
8. Maria S, Samsonraj RM, Munmun F, et al. Biological effects of melatonin on osteoblast/osteoclast cocultures, bone, and quality of life: Implications of a role for MT2 melatonin receptors, MEK1/2, and MEK5 in melatonin-mediated osteoblastogenesis. *Journal of pineal research* 2018;64(3) doi: 10.1111/jpi.12465 [published Online First: 2017/12/30]
9. Bhattacharya S, Patel KK, Dehari D, et al. Melatonin and its ubiquitous anticancer effects. *Molecular and cellular biochemistry* 2019;462(1-2):133-55. doi: 10.1007/s11010-019-03617-5 [published Online First: 2019/08/28]
10. Veiga ECA, Simões R, Valenti VE, et al. Repercussions of melatonin on the risk of breast cancer: a systematic review and meta-analysis. *Revista da Associação Médica Brasileira (1992)* 2019;65(5):699-705. doi: 10.1590/1806-9282.65.5.699 [published Online First: 2019/06/06]
11. Reiter RJ, Rosales-Corral SA, Tan DX, et al. Melatonin, a Full Service Anti-Cancer Agent: Inhibition of Initiation, Progression and Metastasis. *International journal of molecular sciences* 2017;18(4) doi: 10.3390/ijms18040843 [published Online First: 2017/04/20]
12. Wu C, Li M, Meng H, et al. Analysis of status and countermeasures of cancer incidence and mortality in China. *Science China Life sciences* 2019;62(5):640-47. doi: 10.1007/s11427-018-9461-5 [published Online First: 2019/03/23]
13. Ginzac A, Dubois S, Hager MO, et al. Quality of life for older patients with cancer: a review of the evidence supporting melatonin use. *Aging clinical and experimental research* 2020;32(12):2459-68. doi: 10.1007/s40520-020-01532-0 [published Online First: 2020/04/03]
14. Posadzki PP, Bajpai R, Kyaw BM, et al. Melatonin and health: an umbrella review of health outcomes and biological mechanisms of action. *BMC medicine* 2018;16(1):18. doi: 10.1186/s12916-017-1000-8 [published Online First: 2018/02/06]
15. Seely D, Wu P, Fritz H, et al. Melatonin as adjuvant cancer care with and without chemotherapy: a systematic review and meta-analysis of randomized trials. *Integrative cancer therapies* 2012;11(4):293-303. doi: 10.1177/1534735411425484 [published Online First: 2011/10/25]
16. Palmer ACS, Zortea M, Souza A, et al. Clinical impact of melatonin on breast cancer patients undergoing

- 1  
2  
3 chemotherapy; effects on cognition, sleep and depressive symptoms: A randomized, double-blind,  
4 placebo-controlled trial. *PLoS one* 2020;15(4):e0231379. doi: 10.1371/journal.pone.0231379 [published  
5 Online First: 2020/04/18]  
6  
7  
8  
9 17. Sedighi Pashaki A, Mohammadian K, Afshar S, et al. A Randomized, Controlled, Parallel-Group, Trial on the  
10 Effects of Melatonin on Fatigue Associated with Breast Cancer and Its Adjuvant Treatments. *Integrative*  
11 *cancer therapies* 2021;20:1534735420988343. doi: 10.1177/1534735420988343 [published Online First:  
12 2021/02/06]  
13  
14  
15 18. Semiglazova TY, Osipov M, Krivorotko P, et al. Melatonin and metformin in neoadjuvant chemotherapy in  
16 locally advanced breast cancer. *Annals of Oncology* 2019;30:v100. doi: 10.1093/annonc/mdz241.003  
17  
18  
19 19. Lissoni P, Mandala M, Brivio F. Abrogation of the negative influence of opioids on IL-2 immunotherapy of  
20 renal cell cancer by melatonin. *European urology* 2000;38(1):115-8. doi: 10.1159/000020263  
21  
22  
23 20. Farshchian N, Shirzadi M, Farshchian F, et al. Evaluation of the melatonin effect on sleep quality in cancer  
24 patients. *Tehran University Medical Journal* 2020;78(1):38-42.  
25  
26  
27 21. McGrath S, Zhao X, Steele R, et al. Estimating the sample mean and standard deviation from commonly reported  
28 quantiles in meta-analysis. *Statistical methods in medical research* 2020;962280219889080. doi:  
29 10.1177/0962280219889080 [published Online First: 2020/04/16]  
30  
31  
32 22. Sedighi Pashaki A, Afshar S, Mohammadian K, et al. Effects of melatonin on IL-6 serum level changes and fatigue  
33 caused by adjuvant chemoradiotherapy in breast cancer women: A randomized controlled Trial. *Iranian*  
34 *Journal of Breast Diseases* 2021;13(4):23-32. doi: 10.30699/IJBD.13.4.23  
35  
36  
37 23. Innominato PF, Lim AS, Palesh O, et al. The effect of melatonin on sleep and quality of life in patients with  
38 advanced breast cancer. *Supportive care in cancer : official journal of the Multinational Association of*  
39 *Supportive Care in Cancer* 2016;24(3):1097-105. doi: 10.1007/s00520-015-2883-6  
40  
41  
42 24. Chen WY, Giobbie-Hurder A, Gantman K, et al. A randomized, placebo-controlled trial of melatonin on breast  
43 cancer survivors: impact on sleep, mood, and hot flashes. *Breast cancer research and treatment*  
44 2014;145(2):381-8. doi: 10.1007/s10549-014-2944-4 [published Online First: 2014/04/11]  
45  
46  
47 25. Elsbagh HH, Moussa E, Mahmoud SA, et al. Efficacy of Melatonin in prevention of radiation-induced oral  
48 mucositis: A randomized clinical trial. *Oral diseases* 2020;26(3):566-72. doi: 10.1111/odi.13265  
49 [published Online First: 2019/12/24]  
50  
51  
52 26. Grutsch J, Hrushesky W, Lis C, et al. Daily evening melatonin prolongs survival among patients with advanced  
53 non-small-cell lung cancer. *Biological Rhythm Research* 2021 doi: 10.1080/09291016.2021.1899485  
54  
55  
56 27. Hansen MV, Andersen LT, Madsen MT, et al. Effect of melatonin on depressive symptoms and anxiety in  
57  
58  
59  
60

- 1  
2  
3 patients undergoing breast cancer surgery: a randomized, double-blind, placebo-controlled trial. *Breast*  
4 *cancer research and treatment* 2014;145(3):683-95. doi: 10.1007/s10549-014-2962-2  
5  
6  
7 28. Kurdi MS, Muthukalai SP. The Efficacy of Oral Melatonin in Improving Sleep in Cancer Patients with Insomnia:  
8 A Randomized Double-Blind Placebo-Controlled Study. *Indian journal of palliative care* 2016;22(3):295-  
9 300. doi: 10.4103/0973-1075.185039  
10  
11  
12 29. Lissoni P. Is there a role for melatonin in supportive care? *Supportive care in cancer : official journal of the*  
13 *Multinational Association of Supportive Care in Cancer* 2002;10(2):110-6. doi: 10.1007/s005200100281  
14  
15  
16 30. Lissoni P, Barni S, Mandala M, et al. Decreased toxicity and increased efficacy of cancer chemotherapy using  
17 the pineal hormone melatonin in metastatic solid tumour patients with poor clinical status. *European*  
18 *journal of cancer (Oxford, England : 1990)* 1999;35(12):1688-92. doi: 10.1016/s0959-8049(99)00159-8  
19  
20  
21 31. Lissoni P, Tancini G, Barni S, et al. Treatment of cancer chemotherapy-induced toxicity with the pineal hormone  
22 melatonin. *Supportive care in cancer : official journal of the Multinational Association of Supportive Care*  
23 *in Cancer* 1997;5(2):126-9. doi: 10.1007/bf01262569  
24  
25  
26 32. Lozano A, Marruecos J, Rubió J, et al. Randomized placebo-controlled phase II trial of high-dose melatonin  
27 mucoadhesive oral gel for the prevention and treatment of oral mucositis in patients with head and neck  
28 cancer undergoing radiation therapy concurrent with systemic treatment. *Clinical and Translational*  
29 *Oncology* 2021;23(9):1801-10. doi: 10.1007/s12094-021-02586-w  
30  
31  
32  
33 33. Lund Rasmussen C, Klee Olsen M, Thit Johnsen A, et al. Effects of melatonin on physical fatigue and other  
34 symptoms in patients with advanced cancer receiving palliative care: A double-blind placebo-controlled  
35 crossover trial. *Cancer* 2015;121(20):3727-36. doi: 10.1002/cncr.29563  
36  
37  
38  
39 34. Madsen MT, Hansen MV, Andersen LT, et al. Effect of Melatonin on Sleep in the Perioperative Period after  
40 Breast Cancer Surgery: A Randomized, Double-Blind, Placebo-Controlled Trial. *Journal of Clinical Sleep*  
41 *Medicine* 2016;12(2):225-33. doi: 10.5664/jcsm.5490  
42  
43  
44 35. Onseong K, Johns NP, Khuayjarernpanishk T, et al. Beneficial Effects of Adjuvant Melatonin in Minimizing Oral  
45 Mucositis Complications in Head and Neck Cancer Patients Receiving Concurrent Chemoradiation.  
46 *Journal of alternative and complementary medicine (New York, NY)* 2017;23(12):957-63. doi:  
47 10.1089/acm.2017.0081 [published Online First: 2017/06/29]  
48  
49  
50  
51 36. Palmer ACS, Souza A, Dos Santos VS, et al. The Effects of Melatonin on the Descending Pain Inhibitory System  
52 and Neural Plasticity Markers in Breast Cancer Patients Receiving Chemotherapy: Randomized, Double-  
53 Blinded, Placebo-Controlled Trial. *Frontiers in pharmacology* 2019;10:1382. doi:  
54 10.3389/fphar.2019.01382  
55  
56  
57 37. Palmer ACS, Zortea M, Souza A, et al. Clinical impact of melatonin on breast cancer patients undergoing  
58  
59  
60

- 1  
2  
3 chemotherapy; effects on cognition, sleep and depressive symptoms: A randomized, double-blind,  
4 placebo-controlled trial. *PloS one* 2020;15(4):e0231379. doi: 10.1371/journal.pone.0231379  
5  
6  
7 38. Pashaki AS, Mohammadian K, Afshar S, et al. A Randomized, Controlled, Parallel-Group, Trial on the Effects  
8 of Melatonin on Fatigue Associated with Breast Cancer and Its Adjuvant Treatments. *Integrative cancer*  
9 *therapies* 2021;20 doi: 10.1177/1534735420988343  
10  
11  
12 39. Seely D, Legacy M, Auer RC, et al. Adjuvant melatonin for the prevention of recurrence and mortality following  
13 lung cancer resection (AMPLCaRe): A randomized placebo controlled clinical trial. *EClinicalMedicine*  
14 2021;33:100763. doi: 10.1016/j.eclinm.2021.100763  
15  
16  
17 40. Shahrokhi M, Ghaeli P, Arya P, et al. Comparing the Effects of Melatonin and Zolpidem on Sleep Quality,  
18 Depression, and Anxiety in Patients With Colorectal Cancer Undergoing Chemotherapy. *Basic and clinical*  
19 *neuroscience* 2021;12(1):105-14. doi: 10.32598/bcn.12.1.1650.2  
20  
21  
22 41. Sookprasert A, Johns NP, Pnunmanee A, et al. Melatonin in patients with cancer receiving chemotherapy: A  
23 randomized, double-blind, placebo-controlled trial. *Anticancer research* 2014;34(12):7327-37.  
24  
25  
26 42. Yennurajalingam S, Carmack C, Balachandran D, et al. Sleep disturbance in patients with cancer: a feasibility  
27 study of multimodal therapy. *BMJ supportive & palliative care* 2021;11(2):170-79. doi:  
28 10.1136/bmjspcare-2019-001877 [published Online First: 2020/01/12]  
29  
30  
31 43. The World Health Organization has developed a grading system for mucositis based on clinical appearance and  
32 functional status: The World Health Organization; 2018 [Available from:  
33 <http://www.gelclair.nl/Institutional.aspx?Pagina=239&SM=230&Lingua=EN> accessed 29/03 2022.  
34  
35  
36 44. Innominato PF, Lim AS, Palesh O, et al. The effect of melatonin on sleep and quality of life in patients with  
37 advanced breast cancer. *Supportive care in cancer : official journal of the Multinational Association of*  
38 *Supportive Care in Cancer* 2016;24(3):1097-105. doi: 10.1007/s00520-015-2883-6 [published Online  
39 First: 2015/08/12]  
40  
41  
42 45. Del Fabbro E, Dev R, Hui D, et al. Effects of melatonin on appetite and other symptoms in patients with advanced  
43 cancer and cachexia: a double-blind placebo-controlled trial. *Journal of clinical oncology : official journal*  
44 *of the American Society of Clinical Oncology* 2013;31(10):1271-6. doi: 10.1200/jco.2012.43.6766  
45  
46  
47 [published Online First: 2013/02/27]  
48  
49  
50 46. Russcher M, Koch BC, Nagtegaal JE, et al. Long-term effects of melatonin on quality of life and sleep in  
51 haemodialysis patients (Melody study): a randomized controlled trial. *British journal of clinical*  
52 *pharmacology* 2013;76(5):668-79. doi: 10.1111/bcp.12093 [published Online First: 2013/02/26]  
53  
54  
55 47. Sumsuzzman DM, Choi J, Jin Y, et al. Neurocognitive effects of melatonin treatment in healthy adults and  
56 individuals with Alzheimer's disease and insomnia: A systematic review and meta-analysis of randomized  
57  
58  
59  
60



- 1  
2  
3 controlled trials. *Neuroscience and biobehavioral reviews* 2021;127:459-73. doi:  
4 10.1016/j.neubiorev.2021.04.034 [published Online First: 2021/05/07]  
5  
6  
7 48. Baglioni C, Bostanova Z, Bacaro V, et al. A Systematic Review and Network Meta-Analysis of Randomized  
8 Controlled Trials Evaluating the Evidence Base of Melatonin, Light Exposure, Exercise, and  
9 Complementary and Alternative Medicine for Patients with Insomnia Disorder. *Journal of clinical  
10 medicine* 2020;9(6) doi: 10.3390/jcm9061949 [published Online First: 2020/06/26]  
11  
12  
13  
14 49. Pereira N, Naufel MF, Ribeiro EB, et al. Influence of Dietary Sources of Melatonin on Sleep Quality: A Review.  
15 *Journal of food science* 2020;85(1):5-13. doi: 10.1111/1750-3841.14952 [published Online First:  
16 2019/12/20]  
17  
18  
19 50. Fatemeh G, Sajjad M, Niloufar R, et al. Effect of melatonin supplementation on sleep quality: a systematic  
20 review and meta-analysis of randomized controlled trials. *Journal of neurology* 2021 doi: 10.1007/s00415-  
21 020-10381-w [published Online First: 2021/01/09]  
22  
23  
24 51. Hrushesky WJM, Lis CG, Levin RD, et al. Daily evening melatonin prolongs survival among patients with  
25 advanced non-small-cell lung cancer. *Biological Rhythm Research* 2021:1-15. doi:  
26 10.1080/09291016.2021.1899485  
27  
28  
29  
30 52. Wade AG, Ford I, Crawford G, et al. Efficacy of prolonged release melatonin in insomnia patients aged 55-80  
31 years: quality of sleep and next-day alertness outcomes. *Current medical research and opinion*  
32 2007;23(10):2597-605. doi: 10.1185/030079907x233098 [published Online First: 2007/09/19]  
33  
34  
35 53. Ahn JH, Kim M, Park S, et al. Prolonged-release melatonin in Parkinson's disease patients with a poor sleep  
36 quality: A randomized trial. *Parkinsonism & related disorders* 2020;75:50-54. doi:  
37 10.1016/j.parkreldis.2020.03.029 [published Online First: 2020/06/02]  
38  
39  
40 54. Wilhelmsen-Langeland A, Saxvig IW, Pallesen S, et al. A randomized controlled trial with bright light and  
41 melatonin for the treatment of delayed sleep phase disorder: effects on subjective and objective sleepiness  
42 and cognitive function. *Journal of biological rhythms* 2013;28(5):306-21. doi:  
43 10.1177/0748730413500126 [published Online First: 2013/10/18]  
44  
45  
46 55. van Heukelom RO, Prins JB, Smits MG, et al. Influence of melatonin on fatigue severity in patients with chronic  
47 fatigue syndrome and late melatonin secretion. *European journal of neurology* 2006;13(1):55-60. doi:  
48 10.1111/j.1468-1331.2006.01132.x [published Online First: 2006/01/20]  
49  
50  
51 56. Fabi A, Bhargava R, Fatigoni S, et al. Cancer-related fatigue: ESMO Clinical Practice Guidelines for diagnosis  
52 and treatment. *Annals of oncology : official journal of the European Society for Medical Oncology*  
53 2020;31(6):713-23. doi: 10.1016/j.annonc.2020.02.016 [published Online First: 2020/03/17]  
54  
55  
56  
57 57. Hilfiker R, Meichtry A, Eicher M, et al. Exercise and other non-pharmaceutical interventions for cancer-related



- 1  
2  
3 fatigue in patients during or after cancer treatment: a systematic review incorporating an indirect-  
4 comparisons meta-analysis. *British journal of sports medicine* 2018;52(10):651-58. doi: 10.1136/bjsports-  
5 2016-096422 [published Online First: 2017/05/16]  
6  
7  
8  
9 58. Wu C, Zheng Y, Duan Y, et al. Nonpharmacological Interventions for Cancer-Related Fatigue: A Systematic  
10 Review and Bayesian Network Meta-Analysis. *Worldviews on evidence-based nursing* 2019;16(2):102-  
11 10. doi: 10.1111/wvn.12352 [published Online First: 2019/03/29]  
12  
13  
14 59. Lee TYC, Curtin JP. The effects of melatonin prophylaxis on sensory recovery and postoperative pain following  
15 orthognathic surgery: a triple-blind randomized controlled trial and biochemical analysis. *International*  
16 *journal of oral and maxillofacial surgery* 2020;49(4):446-53. doi: 10.1016/j.ijom.2019.07.006 [published  
17 Online First: 2019/08/20]  
18  
19  
20  
21 60. Lafli Tunay D, Türkeün Ilginel M, Ünlügenç H, et al. Comparison of the effects of preoperative melatonin or  
22 vitamin C administration on postoperative analgesia. *Bosnian journal of basic medical sciences*  
23 2020;20(1):117-24. doi: 10.17305/bjbms.2019.4379 [published Online First: 2019/08/30]  
24  
25  
26 61. Keshavarzi F, Mahmoudzadeh F, Brand S, et al. Both melatonin and meloxicam improved sleep and pain in  
27 females with primary dysmenorrhea-results from a double-blind cross-over intervention pilot study.  
28 *Archives of women's mental health* 2018;21(6):601-09. doi: 10.1007/s00737-018-0838-x [published  
29 Online First: 2018/04/06]  
30  
31  
32  
33 62. Gandolfi JV, Di Bernardo APA, Chanes DAV, et al. The Effects of Melatonin Supplementation on Sleep Quality  
34 and Assessment of the Serum Melatonin in ICU Patients: A Randomized Controlled Trial. *Critical care*  
35 *medicine* 2020;48(12):e1286-e93. doi: 10.1097/ccm.0000000000004690 [published Online First:  
36 2020/10/14]  
37  
38  
39  
40 63. Kirksey MA, Yoo D, Danninger T, et al. Impact of Melatonin on Sleep and Pain After Total Knee Arthroplasty  
41 Under Regional Anesthesia With Sedation: A Double-Blind, Randomized, Placebo-Controlled Pilot Study.  
42 *The Journal of arthroplasty* 2015;30(12):2370-5. doi: 10.1016/j.arth.2015.06.034 [published Online First:  
43 2015/07/16]  
44  
45  
46 64. Neufeld NJ, Elnahal SM, Alvarez RH. Cancer pain: a review of epidemiology, clinical quality and value impact.  
47 *Future oncology (London, England)* 2017;13(9):833-41. doi: 10.2217/fon-2016-0423 [published Online  
48 First: 2016/11/24]  
49  
50  
51  
52 65. Yang J, Wahner-Roedler DL, Zhou X, et al. Acupuncture for palliative cancer pain management: systematic  
53 review. *BMJ supportive & palliative care* 2021;11(3):264-70. doi: 10.1136/bmjspcare-2020-002638  
54 [published Online First: 2021/01/15]  
55  
56  
57 66. Ali T, Rahman SU, Hao Q, et al. Melatonin prevents neuroinflammation and relieves depression by attenuating  
58  
59  
60

- 1  
2  
3 autophagy impairment through FOXO3a regulation. *Journal of pineal research* 2020;69(2):e12667. doi:  
4 10.1111/jpi.12667 [published Online First: 2020/05/07]  
5  
6  
7 67. Shabani A, Foroozafard F, Kavossian E, et al. Effects of melatonin administration on mental health parameters,  
8 metabolic and genetic profiles in women with polycystic ovary syndrome: A randomized, double-blind,  
9 placebo-controlled trial. *Journal of affective disorders* 2019;250:51-56. doi: 10.1016/j.jad.2019.02.066  
10 [published Online First: 2019/03/05]  
11  
12  
13  
14 68. Daneshvar Kakhaki R, Ostadmohammadi V, Kouchaki E, et al. Melatonin supplementation and the effects on  
15 clinical and metabolic status in Parkinson's disease: A randomized, double-blind, placebo-controlled trial.  
16 *Clinical neurology and neurosurgery* 2020;195:105878. doi: 10.1016/j.clineuro.2020.105878 [published  
17 Online First: 2020/05/18]  
18  
19  
20  
21 69. Ostadmohammadi V, Soleimani A, Bahmani F, et al. The Effects of Melatonin Supplementation on Parameters  
22 of Mental Health, Glycemic Control, Markers of Cardiometabolic Risk, and Oxidative Stress in Diabetic  
23 Hemodialysis Patients: A Randomized, Double-Blind, Placebo-Controlled Trial. *Journal of renal nutrition*  
24 : the official journal of the Council on Renal Nutrition of the National Kidney Foundation 2020;30(3):242-  
25 50. doi: 10.1053/j.jrn.2019.08.003 [published Online First: 2019/10/11]  
26  
27  
28  
29 70. Madsen MT, Zahid JA, Hansen CH, et al. The effect of melatonin on depressive symptoms and anxiety in patients  
30 after acute coronary syndrome: The MEDACIS randomized clinical trial. *Journal of psychiatric research*  
31 2019;119:84-94. doi: 10.1016/j.jpsychires.2019.09.014 [published Online First: 2019/10/07]  
32  
33  
34  
35 71. Quedstedt DJ, Gibson JC, Sharpley AL, et al. Melatonin In Acute Mania Investigation (MIAMI-UK). A  
36 randomized controlled trial of add-on melatonin in bipolar disorder. *Bipolar disorders* 2021;23(2):176-85.  
37 doi: 10.1111/bdi.12944 [published Online First: 2020/06/01]  
38  
39  
40  
41 72. Anderson PM, Lalla RV. Glutamine for Amelioration of Radiation and Chemotherapy Associated Mucositis  
42 during Cancer Therapy. *Nutrients* 2020;12(6) doi: 10.3390/nu12061675 [published Online First:  
43 2020/06/10]  
44  
45  
46 73. Akagi S, Fujiwara T, Nishida M, et al. The effectiveness of rebamipide mouthwash therapy for radiotherapy and  
47 chemoradiotherapy-induced oral mucositis in patients with head and neck cancer: a systematic review and  
48 meta-analysis. *Journal of pharmaceutical health care and sciences* 2019;5:16. doi: 10.1186/s40780-019-  
49 0146-2 [published Online First: 2019/08/02]  
50  
51  
52 74. Kuba S, Yamanouchi K, Matsumoto M, et al. Study protocol for efficacy and safety of steroid-containing  
53 mouthwash to prevent chemotherapy-induced stomatitis in women with breast cancer: a multicentre, open-  
54 label, randomised phase 2 study. *BMJ open* 2020;10(2):e033446. doi: 10.1136/bmjopen-2019-033446  
55 [published Online First: 2020/02/16]  
56  
57  
58  
59  
60

- 1  
2  
3  
4 75. Lissoni P, Chilelli M, Villa S, et al. Five years survival in metastatic non-small cell lung cancer patients treated  
5 with chemotherapy alone or chemotherapy and melatonin: a randomized trial. *J Pineal Res* 2003;35(1):12-  
6 5. doi: 10.1034/j.1600-079x.2003.00032.x [published Online First: 2003/06/26]  
7  
8  
9 76. Correa MEP, Cheng KKF, Chiang K, et al. Systematic review of oral cryotherapy for the management of oral  
10 mucositis in cancer patients and clinical practice guidelines. *Supportive care in cancer : official journal of*  
11 *the Multinational Association of Supportive Care in Cancer* 2020;28(5):2449-56. doi: 10.1007/s00520-  
12 019-05217-x [published Online First: 2019/12/15]  
13  
14  
15 77. Shu Z, Li P, Yu B, et al. The effectiveness of probiotics in prevention and treatment of cancer therapy-induced  
16 oral mucositis: A systematic review and meta-analysis. *Oral oncology* 2020;102:104559. doi:  
17 10.1016/j.oraloncology.2019.104559 [published Online First: 2020/01/11]  
18  
19  
20 78. Zadik Y, Arany PR, Fregnani ER, et al. Systematic review of photobiomodulation for the management of oral  
21 mucositis in cancer patients and clinical practice guidelines. *Supportive care in cancer : official journal of*  
22 *the Multinational Association of Supportive Care in Cancer* 2019;27(10):3969-83. doi: 10.1007/s00520-  
23 019-04890-2 [published Online First: 2019/07/10]  
24  
25  
26 79. Cronshaw M, Parker S, Anagnostaki E, et al. Photobiomodulation and Oral Mucositis: A Systematic Review.  
27 *Dentistry journal* 2020;8(3) doi: 10.3390/dj8030087 [published Online First: 2020/08/09]  
28  
29  
30 80. Gurunathan S, Qasim M, Kang MH, et al. Role and Therapeutic Potential of Melatonin in Various Type of  
31 Cancers. *OncoTargets and therapy* 2021;14:2019-52. doi: 10.2147/ott.S298512 [published Online First:  
32 2021/03/30]  
33  
34  
35 81. Li Y, Li S, Zhou Y, et al. Melatonin for the prevention and treatment of cancer. *Oncotarget* 2017;8(24):39896-  
36 921. doi: 10.18632/oncotarget.16379 [published Online First: 2017/04/19]  
37  
38  
39  
40  
41  
42  
43  
44  
45  
46  
47  
48  
49  
50  
51  
52  
53  
54  
55  
56  
57  
58  
59  
60

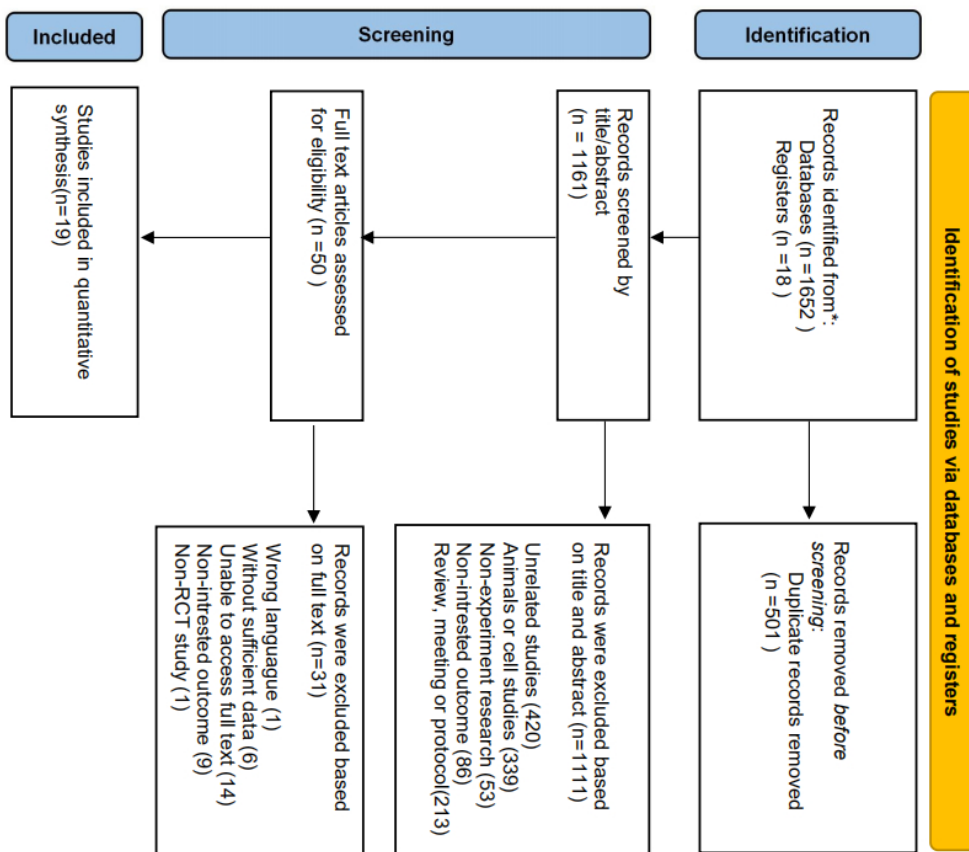

362x322mm (57 x 57 DPI)

1  
2  
3  
4  
5  
6  
7  
8  
9  
10  
11  
12  
13  
14  
15  
16  
17  
18  
19  
20  
21  
22  
23  
24  
25  
26  
27  
28  
29  
30  
31  
32  
33  
34  
35  
36  
37  
38  
39  
40  
41  
42  
43  
44  
45  
46  
47  
48  
49  
50  
51  
52  
53  
54  
55  
56  
57  
58  
59  
60

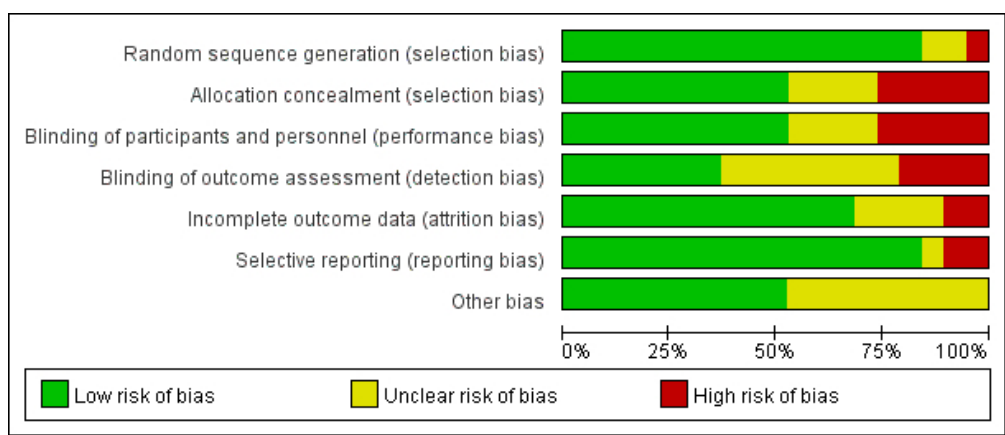

213x90mm (72 x 72 DPI)

1  
2  
3  
4  
5  
6  
7  
8  
9  
10  
11  
12  
13  
14  
15  
16  
17  
18  
19  
20  
21  
22  
23  
24  
25  
26  
27  
28  
29  
30  
31  
32  
33  
34  
35  
36  
37  
38  
39  
40  
41  
42  
43  
44  
45  
46  
47  
48  
49  
50  
51  
52  
53  
54  
55  
56  
57  
58  
59  
60

|                            | Random sequence generation (selection bias) | Allocation concealment (selection bias) | Blinding of participants and personnel (performance bias) | Blinding of outcome assessment (detection bias) | Incomplete outcome data (attrition bias) | Selective reporting (reporting bias) | Other bias |
|----------------------------|---------------------------------------------|-----------------------------------------|-----------------------------------------------------------|-------------------------------------------------|------------------------------------------|--------------------------------------|------------|
| Borbalas et al 2021        | +                                           | ?                                       | ?                                                         | ?                                               | +                                        | +                                    | +          |
| Chen et al 2014            | +                                           | ?                                       | +                                                         | ?                                               | +                                        | +                                    | ?          |
| Elsabagh et al 2019        | -                                           | -                                       | -                                                         | ?                                               | +                                        | +                                    | +          |
| Grutsch et al 2021         | +                                           | +                                       | +                                                         | +                                               | ?                                        | +                                    | ?          |
| Hansen et al 2014          | +                                           | +                                       | +                                                         | -                                               | ?                                        | +                                    | ?          |
| Kurdi et al 2016           | +                                           | +                                       | +                                                         | ?                                               | +                                        | +                                    | +          |
| Madsen et al 2016          | +                                           | +                                       | +                                                         | +                                               | +                                        | +                                    | +          |
| Onseng et al 2017          | +                                           | -                                       | ?                                                         | ?                                               | -                                        | -                                    | ?          |
| P. Lissoni et al 1997      | +                                           | -                                       | -                                                         | -                                               | +                                        | +                                    | ?          |
| P. Lissoni et al 1999      | +                                           | -                                       | -                                                         | -                                               | -                                        | -                                    | ?          |
| P. Lissoni et al 2002      | ?                                           | ?                                       | ?                                                         | ?                                               | +                                        | ?                                    | ?          |
| Palmer et al 2019          | +                                           | +                                       | +                                                         | +                                               | ?                                        | +                                    | +          |
| Palmer et al 2020          | +                                           | +                                       | +                                                         | +                                               | +                                        | +                                    | +          |
| Pashaki et al 2021         | +                                           | +                                       | +                                                         | ?                                               | +                                        | +                                    | ?          |
| Rasmussen et al 2015       | +                                           | +                                       | +                                                         | +                                               | +                                        | +                                    | +          |
| Seely et al 2021           | +                                           | +                                       | +                                                         | +                                               | +                                        | +                                    | +          |
| Shahrokhi et al 2021       | ?                                           | ?                                       | -                                                         | ?                                               | +                                        | +                                    | ?          |
| Sookprasert et al 2014     | +                                           | -                                       | ?                                                         | -                                               | +                                        | +                                    | +          |
| Yennurajalingam et al 2019 | +                                           | +                                       | -                                                         | +                                               | ?                                        | +                                    | +          |

136x321mm (72 x 72 DPI)

1  
2  
3  
4  
5  
6  
7  
8  
9  
10  
11  
12  
13  
14  
15  
16  
17  
18  
19  
20  
21  
22  
23  
24  
25  
26  
27  
28  
29  
30  
31  
32  
33  
34  
35  
36  
37  
38  
39  
40  
41  
42  
43  
44  
45  
46  
47  
48  
49  
50  
51  
52  
53  
54  
55  
56  
57  
58  
59  
60



160x36mm (144 x 144 DPI)

1  
2  
3  
4  
5  
6  
7  
8  
9  
10  
11  
12  
13  
14  
15  
16  
17  
18  
19  
20  
21  
22  
23  
24  
25  
26  
27  
28  
29  
30  
31  
32  
33  
34  
35  
36  
37  
38  
39  
40  
41  
42  
43  
44  
45  
46  
47  
48  
49  
50  
51  
52  
53  
54  
55  
56  
57  
58  
59  
60

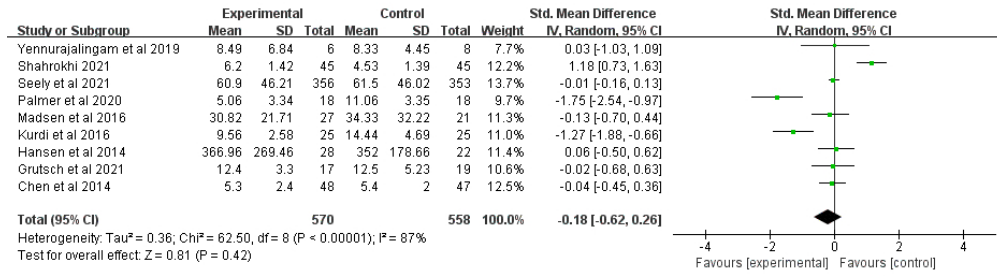

328x90mm (72 x 72 DPI)



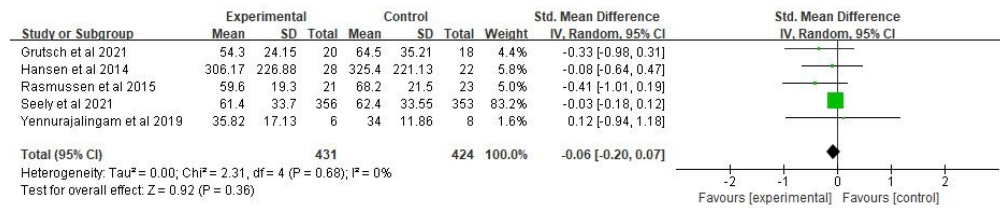

164x33mm (144 x 144 DPI)

1  
2  
3  
4  
5  
6  
7  
8  
9  
10  
11  
12  
13  
14  
15  
16  
17  
18  
19  
20  
21  
22  
23  
24  
25  
26  
27  
28  
29  
30  
31  
32  
33  
34  
35  
36  
37  
38  
39  
40  
41  
42  
43  
44  
45  
46  
47  
48  
49  
50  
51  
52  
53  
54  
55  
56  
57  
58  
59  
60



159x33mm (144 x 144 DPI)

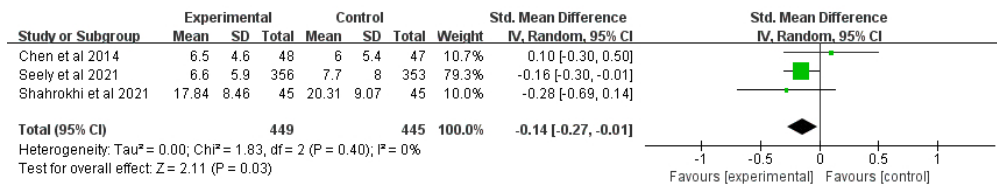

303x56mm (72 x 72 DPI)

1  
2  
3  
4  
5  
6  
7  
8  
9  
10  
11  
12  
13  
14  
15  
16  
17  
18  
19  
20  
21  
22  
23  
24  
25  
26  
27  
28  
29  
30  
31  
32  
33  
34  
35  
36  
37  
38  
39  
40  
41  
42  
43  
44  
45  
46  
47  
48  
49  
50  
51  
52  
53  
54  
55  
56  
57  
58  
59  
60

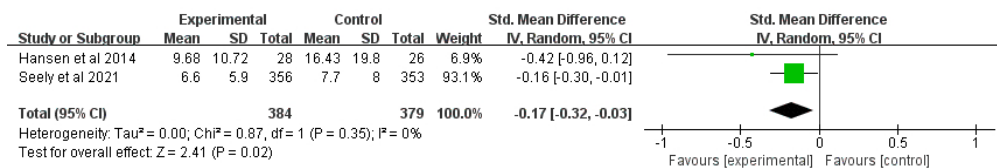

302x50mm (72 x 72 DPI)

1  
2  
3  
4  
5  
6  
7  
8  
9  
10  
11  
12  
13  
14  
15  
16  
17  
18  
19  
20  
21  
22  
23  
24  
25  
26  
27  
28  
29  
30  
31  
32  
33  
34  
35  
36  
37  
38  
39  
40  
41  
42  
43  
44  
45  
46  
47  
48  
49  
50  
51  
52  
53  
54  
55  
56  
57  
58  
59  
60

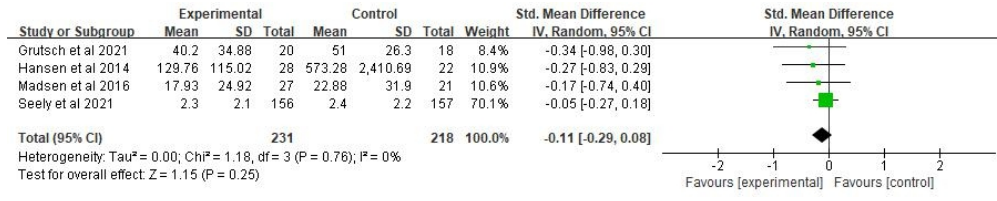

159x31mm (144 x 144 DPI)

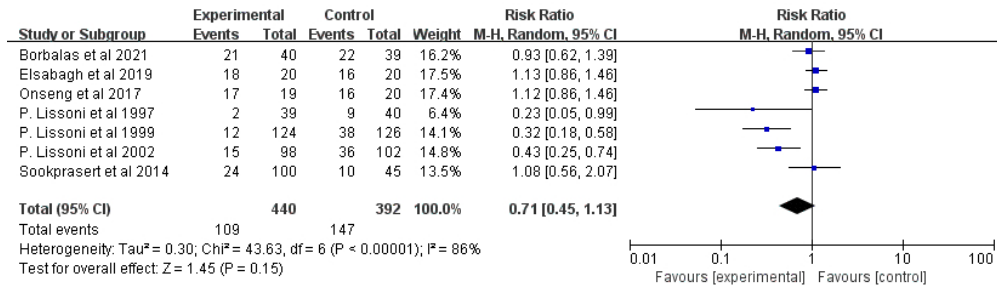

290x84mm (72 x 72 DPI)

1  
2  
3  
4  
5  
6  
7  
8  
9  
10  
11  
12  
13  
14  
15  
16  
17  
18  
19  
20  
21  
22  
23  
24  
25  
26  
27  
28  
29  
30  
31  
32  
33  
34  
35  
36  
37  
38  
39  
40  
41  
42  
43  
44  
45  
46  
47  
48  
49  
50  
51  
52  
53  
54  
55  
56  
57  
58  
59  
60

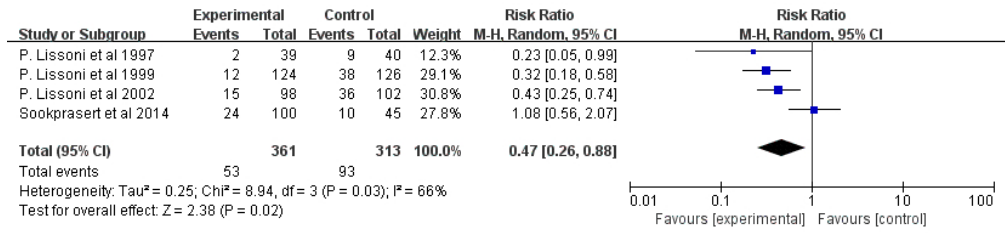

290x67mm (72 x 72 DPI)

1  
2  
3  
4  
5  
6  
7  
8  
9  
10  
11  
12  
13  
14  
15  
16  
17  
18  
19  
20  
21  
22  
23  
24  
25  
26  
27  
28  
29  
30  
31  
32  
33  
34  
35  
36  
37  
38  
39  
40  
41  
42  
43  
44  
45  
46  
47  
48  
49  
50  
51  
52  
53  
54  
55  
56  
57  
58  
59  
60

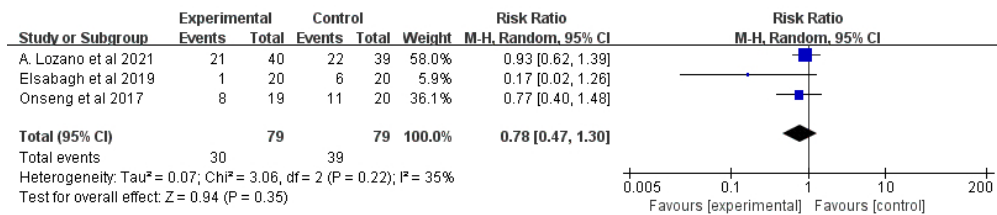

285x62mm (72 x 72 DPI)



| <b>Search strategy</b> |                                                                                        |
|------------------------|----------------------------------------------------------------------------------------|
| #1                     | TS=(neoplasm OR Neoplasia* OR Tumor* OR Cancer* OR Malignancy OR Malignancies)         |
| #2                     | TS=(melatonin)                                                                         |
| #3                     | TS=(Pain)                                                                              |
| #4                     | TS=(fatigue OR lassitude)                                                              |
| #5                     | TS=(oral mucositis OR mucosities OR stomatitis)                                        |
| #6                     | TS=(Depression* OR Depressive)                                                         |
| #7                     | TS=(Appetite* OR Alteration*)                                                          |
| #8                     | TS=(Quality of life OR Life Quality OR Health Related Quality Of Life OR HRQOL OR QOL) |
| #9                     | TS=(sleep disorder OR Insomnia OR sleep dysfunction OR Sleeplessness)                  |
| #10                    | TS=(randomized controlled trial OR randomized OR placebo OR trial OR controlled)       |
| #11                    | (((((#9) OR #8) OR #7) OR #6) OR #5) OR #4) OR #3                                      |
| #12                    | ((#11) AND #10) AND #1) AND #2                                                         |



## PRISMA 2020 Checklist

1  
2  
3  
4  
5  
6  
7  
8  
9  
10  
11  
12  
13  
14  
15  
16  
17  
18  
19  
20  
21  
22  
23  
24  
25  
26  
27  
28  
29  
30  
31  
32  
33  
34  
35  
36  
37  
38  
39  
40  
41  
42  
43  
44  
45  
46  
47

| Section and Topic             | Item # | Checklist item                                                                                                                                                                                                                                                                                       | Location where item is reported  |
|-------------------------------|--------|------------------------------------------------------------------------------------------------------------------------------------------------------------------------------------------------------------------------------------------------------------------------------------------------------|----------------------------------|
| <b>TITLE</b>                  |        |                                                                                                                                                                                                                                                                                                      |                                  |
| Title                         | 1      | Identify the report as a systematic review.                                                                                                                                                                                                                                                          | Page 1 in "Title"                |
| <b>ABSTRACT</b>               |        |                                                                                                                                                                                                                                                                                                      |                                  |
| Abstract                      | 2      | See the PRISMA 2020 for Abstracts checklist.                                                                                                                                                                                                                                                         | Page 1 in "Abstract"             |
| <b>INTRODUCTION</b>           |        |                                                                                                                                                                                                                                                                                                      |                                  |
| Rationale                     | 3      | Describe the rationale for the review in the context of existing knowledge.                                                                                                                                                                                                                          | Page 2 in "Introduction"         |
| Objectives                    | 4      | Provide an explicit statement of the objective(s) or question(s) the review addresses.                                                                                                                                                                                                               | Page 2 in "Introduction"         |
| <b>METHODS</b>                |        |                                                                                                                                                                                                                                                                                                      |                                  |
| Eligibility criteria          | 5      | Specify the inclusion and exclusion criteria for the review and how studies were grouped for the syntheses.                                                                                                                                                                                          | Page 3 in "Eligibility criteria" |
| Information sources           | 6      | Specify all databases, registers, websites, organisations, reference lists and other sources searched or consulted to identify studies. Specify the date when each source was last searched or consulted.                                                                                            | Page 3 in "Search strategy"      |
| Search strategy               | 7      | Present the full search strategies for all databases, registers and websites, including any filters and limits used.                                                                                                                                                                                 | Page 3 in "Search strategy"      |
| Selection process             | 8      | Specify the methods used to decide whether a study met the inclusion criteria of the review, including how many reviewers screened each record and each report retrieved, whether they worked independently, and if applicable, details of automation tools used in the process.                     | Page 3 in "Data extraction"      |
| Data collection process       | 9      | Specify the methods used to collect data from reports, including how many reviewers collected data from each report, whether they worked independently, any processes for obtaining or confirming data from study investigators, and if applicable, details of automation tools used in the process. | Page 3 in "Data extraction"      |
| Data items                    | 10a    | List and define all outcomes for which data were sought. Specify whether all results that were compatible with each outcome domain in each study were sought (e.g. for all measures, time points, analyses), and if not, the methods used to decide which results to collect.                        | Page 3 in "Data extraction"      |
|                               | 10b    | List and define all other variables for which data were sought (e.g. participant and intervention characteristics, funding sources). Describe any assumptions made about any missing or unclear information.                                                                                         | Page 5-6 in "table 1"            |
| Study risk of bias assessment | 11     | Specify the methods used to assess risk of bias in the included studies, including details of the tool(s) used, how many reviewers assessed each study and whether they worked independently, and if applicable, details of automation tools used in the process.                                    | Page 4 in "Quality assessment"   |
| Effect measures               | 12     | Specify for each outcome the effect measure(s) (e.g. risk ratio, mean difference) used in the synthesis or presentation of results.                                                                                                                                                                  | Page 3 in "Data analysis"        |
| Synthesis methods             | 13a    | Describe the processes used to decide which studies were eligible for each synthesis (e.g. tabulating the study intervention characteristics and comparing against the planned groups for each synthesis (item #5)).                                                                                 | Page 3 in "Data analysis"        |
|                               | 13b    | Describe any methods required to prepare the data for presentation or synthesis, such as handling of missing summary statistics, or data                                                                                                                                                             | Page 3 in                        |

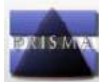

## PRISMA 2020 Checklist

| Section and Topic             | Item # | Checklist item                                                                                                                                                                                                                                                                       | Location where item is reported        |
|-------------------------------|--------|--------------------------------------------------------------------------------------------------------------------------------------------------------------------------------------------------------------------------------------------------------------------------------------|----------------------------------------|
|                               |        | conversions.                                                                                                                                                                                                                                                                         | "Data analysis"                        |
|                               | 13c    | Describe any methods used to tabulate or visually display results of individual studies and syntheses.                                                                                                                                                                               | Page 3 in "Data analysis"              |
|                               | 13d    | Describe any methods used to synthesize results and provide a rationale for the choice(s). If meta-analysis was performed, describe the model(s), method(s) to identify the presence and extent of statistical heterogeneity, and software package(s) used.                          | Page 3 in "Data analysis"              |
|                               | 13e    | Describe any methods used to explore possible causes of heterogeneity among study results (e.g. subgroup analysis, meta-regression).                                                                                                                                                 | Page 3 in "Data analysis"              |
|                               | 13f    | Describe any sensitivity analyses conducted to assess robustness of the synthesized results.                                                                                                                                                                                         | Page 3 in "Data analysis"              |
| Reporting bias assessment     | 14     | Describe any methods used to assess risk of bias due to missing results in a synthesis (arising from reporting biases).                                                                                                                                                              | Page 3 in "Data analysis"              |
| Certainty assessment          | 15     | Describe any methods used to assess certainty (or confidence) in the body of evidence for an outcome.                                                                                                                                                                                | Page 3 in "Risk of bias assessment"    |
| <b>RESULTS</b>                |        |                                                                                                                                                                                                                                                                                      |                                        |
| Study selection               | 16a    | Describe the results of the search and selection process, from the number of records identified in the search to the number of studies included in the review, ideally using a flow diagram.                                                                                         | Page 4 in "Literature search"          |
|                               | 16b    | Cite studies that might appear to meet the inclusion criteria, but which were excluded, and explain why they were excluded.                                                                                                                                                          | Page 4 in "Literature search"          |
| Study characteristics         | 17     | Cite each included study and present its characteristics.                                                                                                                                                                                                                            | Page 4 in "Literature characteristics" |
| Risk of bias in studies       | 18     | Present assessments of risk of bias for each included study.                                                                                                                                                                                                                         | Page 4 in "Quality assessment"         |
| Results of individual studies | 19     | For all outcomes, present, for each study: (a) summary statistics for each group (where appropriate) and (b) an effect estimate and its precision (e.g. confidence/credible interval), ideally using structured tables or plots.                                                     | Page 4 in "Literature characteristics" |
| Results of syntheses          | 20a    | For each synthesis, briefly summarise the characteristics and risk of bias among contributing studies.                                                                                                                                                                               | Page 4 in "Quality assessment"         |
|                               | 20b    | Present results of all statistical syntheses conducted. If meta-analysis was done, present for each the summary estimate and its precision (e.g. confidence/credible interval) and measures of statistical heterogeneity. If comparing groups, describe the direction of the effect. | Page 7-9                               |
|                               | 20c    | Present results of all investigations of possible causes of heterogeneity among study results.                                                                                                                                                                                       | Page 7-9                               |
|                               | 20d    | Present results of all sensitivity analyses conducted to assess the robustness of the synthesized results.                                                                                                                                                                           | Page 7-9                               |
| Reporting biases              | 21     | Present assessments of risk of bias due to missing results (arising from reporting biases) for each synthesis assessed.                                                                                                                                                              | Page 7-9                               |
| Certainty of                  | 22     | Present assessments of certainty (or confidence) in the body of evidence for each outcome assessed.                                                                                                                                                                                  | Page 7-9                               |



## PRISMA 2020 Checklist

1  
2  
3  
4  
5  
6  
7  
8  
9  
10  
11  
12  
13  
14  
15  
16  
17  
18  
19  
20  
21  
22  
23  
24  
25  
26  
27  
28  
29  
30  
31  
32  
33  
34  
35  
36  
37  
38  
39  
40  
41  
42  
43  
44  
45  
46  
47

| Section and Topic                              | Item # | Checklist item                                                                                                                                                                                                                             | Location where item is reported |
|------------------------------------------------|--------|--------------------------------------------------------------------------------------------------------------------------------------------------------------------------------------------------------------------------------------------|---------------------------------|
| evidence                                       |        |                                                                                                                                                                                                                                            |                                 |
| <b>DISCUSSION</b>                              |        |                                                                                                                                                                                                                                            |                                 |
| Discussion                                     | 23a    | Provide a general interpretation of the results in the context of other evidence.                                                                                                                                                          | Page 9-12                       |
|                                                | 23b    | Discuss any limitations of the evidence included in the review.                                                                                                                                                                            | Page 9-12                       |
|                                                | 23c    | Discuss any limitations of the review processes used.                                                                                                                                                                                      | Page 9-12                       |
|                                                | 23d    | Discuss implications of the results for practice, policy, and future research.                                                                                                                                                             | Page 9-12                       |
| <b>OTHER INFORMATION</b>                       |        |                                                                                                                                                                                                                                            |                                 |
| Registration and protocol                      | 24a    | Provide registration information for the review, including register name and registration number, or state that the review was not registered.                                                                                             | Page 2 in "method"              |
|                                                | 24b    | Indicate where the review protocol can be accessed, or state that a protocol was not prepared.                                                                                                                                             | Page 2 in "method"              |
|                                                | 24c    | Describe and explain any amendments to information provided at registration or in the protocol.                                                                                                                                            | Page 2 in "method"              |
| Support                                        | 25     | Describe sources of financial or non-financial support for the review, and the role of the funders or sponsors in the review.                                                                                                              | Page 13 in "Footnotes"          |
| Competing interests                            | 26     | Declare any competing interests of review authors.                                                                                                                                                                                         | Page 13 in "Footnotes"          |
| Availability of data, code and other materials | 27     | Report which of the following are publicly available and where they can be found: template data collection forms; data extracted from included studies; data used for all analyses; analytic code; any other materials used in the review. | Page 13 in "Footnotes"          |

From: Page MJ, McKenzie JE, Bossuyt PM, Boutron I, Hoffmann TC, Mulrow CD, et al. The PRISMA 2020 statement: an updated guideline for reporting systematic reviews. *BMJ* 2021;372:n71. doi: 10.1136/bmj.n71

For more information, visit: <http://www.prisma-statement.org/>
