# Supplementary material for: Effect of melatonin on quality of life and symptoms in patients with cancer: a systematic review and meta-analysis of randomised controlled trials
Source: PubMed Central journal article supplement — BMJ Open. 2022 Sep 14;12(9):e060912. doi: 10.1136/bmjopen-2022-060912 (PMC9476160; doi:10.1136/bmjopen-2022-060912), 2022-09-14
Supplement: bmjopen-2022-060912supp001.pdf [file bmjopen-2022-060912supp001.pdf]

| <b>Search strategy</b> |                                                                                        |
|------------------------|----------------------------------------------------------------------------------------|
| #1                     | TS=(neoplasm OR Neoplasia* OR Tumor* OR Cancer* OR Malignancy OR Malignancies)         |
| #2                     | TS=(melatonin)                                                                         |
| #3                     | TS=(Pain)                                                                              |
| #4                     | TS=(fatigue OR lassitude)                                                              |
| #5                     | TS=(oral mucositis OR mucosities OR stomatitis)                                        |
| #6                     | TS=(Depression* OR Depressive)                                                         |
| #7                     | TS=(Appetite* OR Alteration*)                                                          |
| #8                     | TS=(Quality of life OR Life Quality OR Health Related Quality Of Life OR HRQOL OR QOL) |
| #9                     | TS=(sleep disorder OR Insomnia OR sleep dysfunction OR Sleeplessness)                  |
| #10                    | TS=(randomized controlled trial OR randomized OR placebo OR trial OR controlled)       |
| #11                    | (((((#9) OR #8) OR #7) OR #6) OR #5) OR #4) OR #3                                      |
| #12                    | ((#11) AND #10) AND #1) AND #2                                                         |
